# Supplementary material for: Children are not like other loads: a cross-cultural perspective on the influence of burdens and companionship on human walking
Source: PeerJ. 2018 Sep 12;6:e5547. doi: 10.7717/peerj.5547 (PMC6139008; doi:10.7717/peerj.5547)
Supplement: Data S1 [file peerj-06-5547-s002.xlsx]

## Sheet: All Data Compiled 042617
DataCollector	Date	Time	Location	MeasuredDistance	WeatherSun0Clouds1Lt.Rain2HeavyRain3	DyadDescription0Granman1Granwoman2Man3Woman4Teenman5Teenwoman6Gi	WalkerSex	DyadAgeGroup0Grandparent1Adult2Teen3Child	Loaded	LoadPosition	LoadType	LoadSize	AgeGroupofChild	DyadParty0Alone1Group	PartyGranman	Partygranwoman	PartyMen	PartyWomen	PartyTeenman	PartyTeenwoman	PartyBoy	PartyGirl	PartyDog	PartyTotalMales	PartyTotalFemales	PartyTotal	Timesec	Speedmsec	OnlyMenPartners	OnlyWomenPartners	OnlyAdults	ChildrenPresent	GroupCompNotIncludingWalker	ChildTransportMode	GroupComposition
Leah Bouterse	09/23/2016	11:45:00	0	7.3m	1	2	0	1	0			0		0	0	0	1	0	0	0	0	0	0	1	0	1	7.2	1.01389	0	0	0	0	0	0	0
Leah Bouterse	09/23/2016	11:45:00	0	7.3m	1	2	0	1	0			0		0	0	0	1	0	0	0	0	0	0	1	0	1	5.5	1.32727	0	0	0	0	0	0	0
Leah Bouterse	09/23/2016	11:45:00	0	7.3m	1	2	0	1	0			0		0	0	0	1	0	0	0	0	0	0	1	0	1	6.17	1.18314	0	0	0	0	0	0	0
Leah Bouterse	09/23/2016	11:45:00	0	7.3m	1	2	0	1	0			0		0	0	0	1	0	0	0	0	0	0	1	0	1	5.4	1.35185	0	0	0	0	0	0	0
Leah Bouterse	09/23/2016	11:45:00	0	7.3m	1	2	0	1	0			0		0	0	0	1	0	0	0	0	0	0	1	0	1	6.58	1.10942	0	0	0	0	0	0	0
Leah Bouterse	09/23/2016	11:45:00	0	7.3m	1	3	1	1	0			0		0	0	0	0	1	0	0	0	0	0	0	1	1	9.95	0.733668	0	0	0	0	0	0	0
Leah Bouterse	09/23/2016	11:45:00	0	7.3m	1	3	1	1	0			0		0	0	0	0	1	0	0	0	0	0	0	1	1	7.23	1.00968	0	0	0	0	0	0	0
Leah Bouterse	09/23/2016	11:45:00	0	7.3m	1	2	0	1	1	2	0	3	1	0	0	0	1	0	0	0	0	0	0	1	0	1	7.7	0.948052	0	0	0	1	0	1	0
Leah Bouterse	09/23/2016	11:45:00	0	7.3m	1	3	1	1	1	0	0	2	0	0	0	0	0	1	0	0	0	0	0	0	1	1	19.04	0.383403	0	0	0	1	0	1	0
Leah Bouterse	09/23/2016	11:45:00	0	7.3m	1	3	1	1	1	0	0	2	0	0	0	0	0	1	0	0	0	0	0	0	1	1	8.57	0.851809	0	0	0	1	0	1	0
Leah Bouterse	09/23/2016	11:45:00	0	7.3m	1	3	1	1	1	0	0	2	0	0	0	0	0	1	0	0	0	0	0	0	1	1	8.43	0.865955	0	0	0	1	0	1	0
Leah Bouterse	09/23/2016	11:45:00	0	7.3m	1	3	1	1	1	0	0	2	0	0	0	0	0	1	0	0	0	0	0	0	1	1	7.97	0.915935	0	0	0	1	0	1	0
Leah Bouterse	09/23/2016	11:45:00	0	7.3m	1	3	1	1	1	0	0	2	0	0	0	0	0	1	0	0	0	0	0	0	1	1	7.9	0.924051	0	0	0	1	0	1	0
Leah Bouterse	09/23/2016	11:45:00	0	7.3m	1	3	1	1	1	0	0	2	0	0	0	0	0	1	0	0	0	0	0	0	1	1	8.08	0.903465	0	0	0	1	0	1	0
Leah Bouterse	09/23/2016	11:45:00	0	7.3m	1	3	1	1	1	0	0	2	0	0	0	0	0	1	0	0	0	0	0	0	1	1	12.4	0.58871	0	0	0	1	0	1	0
Leah Bouterse	09/23/2016	11:45:00	0	7.3m	1	3	1	1	1	1	0	2	0	0	0	0	0	1	0	0	0	0	0	0	1	1	6.73	1.0847	0	0	0	1	0	1	0
Leah Bouterse	09/23/2016	11:45:00	0	7.3m	1	3	1	1	1	1	0	2	0	0	0	0	0	1	0	0	0	0	0	0	1	1	10.52	0.693916	0	0	0	1	0	1	0
Leah Bouterse	09/23/2016	11:45:00	0	7.3m	1	3	1	1	1	2	0	2	0	0	0	0	0	1	0	0	0	0	0	0	1	1	8.67	0.841984	0	0	0	1	0	1	0
Leah Bouterse	09/23/2016	11:45:00	0	7.3m	1	3	1	1	1	2	0	2	0	0	0	0	0	1	0	0	0	0	0	0	1	1	8.93	0.817469	0	0	0	1	0	1	0
Leah Bouterse	09/23/2016	11:45:00	0	7.3m	1	3	1	1	1	2	0	3	2	0	0	0	0	1	0	0	0	0	0	0	1	1	9.6	0.760417	0	0	0	1	0	1	0
Leah Bouterse	09/23/2016	11:45:00	0	7.3m	1	3	1	1	1	2	0	3	1	0	0	0	0	1	0	0	0	0	0	0	1	1	8.37	0.872162	0	0	0	1	0	1	0
Leah Bouterse	09/23/2016	11:45:00	0	7.3m	1	2	0	1	1	1	2	1		0	0	0	1	0	0	0	0	0	0	1	0	1	7.2	1.01389	0	0	0	0	0	0	0
Leah Bouterse	09/23/2016	11:45:00	0	7.3m	1	2	0	1	1	1	2	1		0	0	0	1	0	0	0	0	0	0	1	0	1	12.39	0.589185	0	0	0	0	0	0	0
Leah Bouterse	09/23/2016	11:45:00	0	7.3m	1	2	0	1	1	2	2	1		0	0	0	1	0	0	0	0	0	0	1	0	1	7.08	1.03107	0	0	0	0	0	0	0
Leah Bouterse	09/23/2016	11:45:00	0	7.3m	1	2	0	1	1	3	2	1		0	0	0	1	0	0	0	0	0	0	1	0	1	5.33	1.36961	0	0	0	0	0	0	0
Leah Bouterse	09/23/2016	11:45:00	0	7.3m	1	2	0	1	1	0	2	2		0	0	0	1	0	0	0	0	0	0	1	0	1	6.78	1.0767	0	0	0	0	0	0	0
Leah Bouterse	09/23/2016	11:45:00	0	7.3m	1	2	0	1	1	1	2	2		0	0	0	1	0	0	0	0	0	0	1	0	1	7.6	0.960526	0	0	0	0	0	0	0
Leah Bouterse	09/23/2016	11:45:00	0	7.3m	1	2	0	1	1	1	2	2		0	0	0	1	0	0	0	0	0	0	1	0	1	7.02	1.03989	0	0	0	0	0	0	0
Leah Bouterse	09/23/2016	11:45:00	0	7.3m	1	2	0	1	1	2	2	2		0	0	0	1	0	0	0	0	0	0	1	0	1	5.85	1.24786	0	0	0	0	0	0	0
Leah Bouterse	09/23/2016	11:45:00	0	7.3m	1	2	0	1	1	3	2	2		0	0	0	1	0	0	0	0	0	0	1	0	1	4.32	1.68981	0	0	0	0	0	0	0
Leah Bouterse	09/23/2016	11:45:00	0	7.3m	1	2	0	1	1	2	2	3		0	0	0	1	0	0	0	0	0	0	1	0	1	7.78	0.938303	0	0	0	0	0	0	0
Leah Bouterse	09/23/2016	11:45:00	0	7.3m	1	2	0	1	1	2	2	3		0	0	0	1	0	0	0	0	0	0	1	0	1	6.86	1.06414	0	0	0	0	0	0	0
Leah Bouterse	09/23/2016	11:45:00	0	7.3m	1	2	0	1	1	2	2	3		0	0	0	1	0	0	0	0	0	0	1	0	1	6	1.21667	0	0	0	0	0	0	0
Leah Bouterse	09/23/2016	11:45:00	0	7.3m	1	2	0	1	1	3	2	3		0	0	0	1	0	0	0	0	0	0	1	0	1	7.55	0.966887	0	0	0	0	0	0	0
Leah Bouterse	09/23/2016	11:45:00	0	7.3m	1	3	1	1	1	2	2	1		0	0	0	0	1	0	0	0	0	0	0	1	1	6.43	1.1353	0	0	0	0	0	0	0
Leah Bouterse	09/23/2016	11:45:00	0	7.3m	1	3	1	1	1	2	2	1		0	0	0	0	1	0	0	0	0	0	0	1	1	5.36	1.36194	0	0	0	0	0	0	0
Leah Bouterse	09/23/2016	11:45:00	0	7.3m	1	3	1	1	1	2	2	1		0	0	0	0	1	0	0	0	0	0	0	1	1	7.37	0.990502	0	0	0	0	0	0	0
Leah Bouterse	09/23/2016	11:45:00	0	7.3m	1	3	1	1	1	2	2	1		0	0	0	0	1	0	0	0	0	0	0	1	1	6.78	1.0767	0	0	0	0	0	0	0
Leah Bouterse	09/23/2016	11:45:00	0	7.3m	1	3	1	1	1	2	2	1		0	0	0	0	1	0	0	0	0	0	0	1	1	7.08	1.03107	0	0	0	0	0	0	0
Leah Bouterse	09/23/2016	11:45:00	0	7.3m	1	3	1	1	1	0	2	2		0	0	0	0	1	0	0	0	0	0	0	1	1	5.75	1.26957	0	0	0	0	0	0	0
Leah Bouterse	09/23/2016	11:45:00	0	7.3m	1	3	1	1	1	2	2	2		0	0	0	0	1	0	0	0	0	0	0	1	1	8.04	0.90796	0	0	0	0	0	0	0
Leah Bouterse	09/23/2016	11:45:00	0	7.3m	1	3	1	1	1	2	2	2		0	0	0	0	1	0	0	0	0	0	0	1	1	7.38	0.98916	0	0	0	0	0	0	0
Leah Bouterse	09/23/2016	11:45:00	0	7.3m	1	3	1	1	1	2	2	2		0	0	0	0	1	0	0	0	0	0	0	1	1	6.02	1.21262	0	0	0	0	0	0	0
Leah Bouterse	09/23/2016	11:45:00	0	7.3m	1	3	1	1	1	2	2	2		0	0	0	0	1	0	0	0	0	0	0	1	1	14.84	0.491914	0	0	0	0	0	0	0
Leah Bouterse	09/23/2016	11:45:00	0	7.3m	1	3	1	1	1	2	2	2		0	0	0	0	1	0	0	0	0	0	0	1	1	8.33	0.876351	0	0	0	0	0	0	0
Leah Bouterse	09/23/2016	11:45:00	0	7.3m	1	3	1	1	1	2	2	2		0	0	0	0	1	0	0	0	0	0	0	1	1	11.31	0.645447	0	0	0	0	0	0	0
Leah Bouterse	09/23/2016	11:45:00	0	7.3m	1	3	1	1	1	3	2	2		0	0	0	0	1	0	0	0	0	0	0	1	1	8.72	0.837156	0	0	0	0	0	0	0
Leah Bouterse	09/23/2016	11:45:00	0	7.3m	1	3	1	1	1	3	2	2		0	0	0	0	1	0	0	0	0	0	0	1	1	7.65	0.954248	0	0	0	0	0	0	0
Leah Bouterse	09/23/2016	11:45:00	0	7.3m	1	3	1	1	1	3	2	3		0	0	0	0	1	0	0	0	0	0	0	1	1	8.52	0.856808	0	0	0	0	0	0	0
Leah Bouterse	09/23/2016	11:45:00	0	7.3m	1	6	1	3	1	1	2	3		0	0	0	0	0	0	0	0	1	0	0	1	1	11.12	0.656475	0	0	0	1	7	2	0
Leah Bouterse	09/23/2016	11:45:00	0	7.3m	1	2	0	1	1	2	2	1		1	0	0	2	0	0	0	0	0	0	2	0	2	8.52	0.856808	1	0	0	0	1	0	1
Leah Bouterse	09/23/2016	11:45:00	0	7.3m	1	2	0	1	1	2	2	1		1	0	0	2	0	0	0	0	0	0	2	0	2	7.25	1.0069	1	0	0	0	1	0	1
Leah Bouterse	09/23/2016	11:45:00	0	7.3m	1	2	0	1	1	2	2	1		1	0	0	2	0	0	0	0	0	0	2	0	2	6.75	1.08148	1	0	0	0	1	0	1
Leah Bouterse	09/23/2016	11:45:00	0	7.3m	1	4	0	2	1	2	2	1		1	0	0	0	0	2	0	0	0	0	2	0	2	6.85	1.06569	1	0	0	0	1	0	1
Leah Bouterse	09/23/2016	11:45:00	0	7.3m	1	2	0	1	1	3	2	1		1	0	0	2	0	0	0	0	0	0	2	0	2	8.08	0.903465	1	0	0	0	1	0	1
Leah Bouterse	09/23/2016	11:45:00	0	7.3m	1	3	1	1	1	1	2	2		1	0	0	1	1	0	0	0	0	0	1	1	2	7.87	0.927573	1	0	0	0	1	0	6
Leah Bouterse	09/23/2016	11:45:00	0	7.3m	1	3	1	1	1	2	2	2		1	0	0	1	1	0	0	0	0	0	1	1	2	10.07	0.724926	1	0	0	0	1	0	6
Leah Bouterse	09/23/2016	11:45:00	0	7.3m	1	3	1	1	1	2	2	1		1	0	0	0	2	0	0	0	0	0	0	2	2	12.19	0.598852	0	1	0	0	2	0	2
Leah Bouterse	09/23/2016	11:45:00	0	7.3m	1	3	1	1	1	2	2	1		1	0	0	0	2	0	0	0	0	0	0	2	2	11.2	0.651786	0	1	0	0	2	0	2
Leah Bouterse	09/23/2016	11:45:00	0	7.3m	1	3	1	1	1	2	2	1		1	0	0	0	2	0	0	0	0	0	0	2	2	7.92	0.921717	0	1	0	0	2	0	2
Leah Bouterse	09/23/2016	11:45:00	0	7.3m	1	3	1	1	1	3	2	2		1	0	0	0	2	0	0	0	0	0	0	2	2	7.45	0.979866	0	1	0	0	2	0	2
Leah Bouterse	09/23/2016	11:45:00	0	7.3m	1	2	0	1	0			0		1	0	0	1	0	0	0	1	0	0	2	0	2	13.05	0.559387	1	0	0	1	3	2	3
Leah Bouterse	09/23/2016	11:45:00	0	7.3m	1	3	1	1	1	2	0	2	0	1	0	0	1	1	0	0	0	0	0	1	1	2	8.42	0.866983	1	0	0	1	3	1	5
Leah Bouterse	09/23/2016	11:45:00	0	7.3m	1	3	1	1	1	0	2	1		1	0	0	0	1	0	0	1	0	0	1	1	2	10.85	0.672811	1	0	0	1	3	2	4
Leah Bouterse	09/23/2016	11:45:00	0	7.3m	1	3	1	1	1	2	2	1		1	0	0	0	1	0	0	1	0	0	1	1	2	11.23	0.650045	1	0	0	1	3	2	4
Leah Bouterse	09/23/2016	11:45:00	0	7.3m	1	3	1	1	0			0		1	0	0	0	1	0	0	0	1	0	0	2	2	8.58	0.850816	0	1	0	1	4	2	4
Leah Bouterse	09/23/2016	11:45:00	0	7.3m	1	2	0	1	1	0	0	2	0	1	0	0	1	1	0	0	0	0	0	1	1	2	9.33	0.782422	0	1	0	1	4	1	5
Leah Bouterse	09/23/2016	11:45:00	0	7.3m	1	3	1	1	1	0	0	2	0	1	0	0	0	2	0	0	0	0	0	0	2	2	9.2	0.793478	0	1	0	1	4	1	4
Leah Bouterse	09/23/2016	11:45:00	0	7.3m	1	3	1	1	1	0	0	3	1	1	0	0	0	1	0	0	0	1	0	0	2	2	7.55	0.966887	0	1	0	1	4	3	4
Leah Bouterse	09/23/2016	11:45:00	0	7.3m	1	3	1	1	1	2	0	3	1	1	0	0	0	2	0	0	0	0	0	0	2	2	15.6	0.467949	0	1	0	1	4	1	4
Leah Bouterse	09/23/2016	11:45:00	0	7.3m	1	3	1	1	1	2	2	2		1	0	0	0	1	0	0	0	1	0	0	2	2	6.88	1.06105	0	1	0	1	4	2	4
Leah Bouterse	09/23/2016	11:45:00	0	7.3m	1	2	0	1	1	0	0	2	0	1	0	0	1	1	0	0	1	0	0	2	1	3	8.42	0.866983	0	0	1	1	5	3	5
Leah Bouterse	09/23/2016	11:45:00	0	7.3m	1	3	1	1	1	2	2	2		1	0	0	0	1	0	0	1	1	0	1	2	3	9.27	0.787487	0	0	1	1	5	2	4
Leah Bouterse	09/23/2016	11:45:00	0	7.3m	1	3	1	1	1	2	2	1		1	0	0	1	2	0	0	0	0	0	1	2	3	9.3	0.784946	0	0	1	0	6	0	6
Leah Bouterse	09/23/2016	11:45:00	0	7.3m	1	3	1	1	1	2	2	2		1	0	0	1	2	0	0	0	0	0	1	2	3	8.2	0.890244	0	0	1	0	6	0	6
Leah Bouterse	09/23/2016	11:45:00	0	7.3m	1	7	1	3	1	2	2	1		1	0	0	0	0	0	0	2	2	0	2	2	4	10.82	0.674677	0	0	1	1	7	2	7
Leah Bouterse	10/24/2016	13:00:00	0	7.3m	0	2	0	1	0			0		0	0	0	1	0	0	0	0	0	0	1	0	1	6.53	1.11792	0	0	0	0	0	0	0
Leah Bouterse	10/24/2016	13:00:00	0	7.3m	0	2	0	1	0			0		0	0	0	1	0	0	0	0	0	0	1	0	1	7.62	0.958005	0	0	0	0	0	0	0
Leah Bouterse	10/24/2016	13:00:00	0	7.3m	0	2	0	1	0			0		0	0	0	1	0	0	0	0	0	0	1	0	1	5.67	1.28748	0	0	0	0	0	0	0
Leah Bouterse	10/24/2016	13:00:00	0	7.3m	0	2	0	1	0			0		0	0	0	1	0	0	0	0	0	0	1	0	1	7	1.04286	0	0	0	0	0	0	0
Leah Bouterse	10/24/2016	13:00:00	0	7.3m	0	2	0	1	0			0		0	0	0	1	0	0	0	0	0	0	1	0	1	6.28	1.16242	0	0	0	0	0	0	0
Leah Bouterse	10/24/2016	13:00:00	0	7.3m	0	2	0	1	0			0		0	0	0	1	0	0	0	0	0	0	1	0	1	7.07	1.03253	0	0	0	0	0	0	0
Leah Bouterse	10/24/2016	13:00:00	0	7.3m	0	3	1	1	0			0		0	0	0	0	1	0	0	0	0	0	0	1	1	6.43	1.1353	0	0	0	0	0	0	0
Leah Bouterse	10/24/2016	13:00:00	0	7.3m	0	3	1	1	0			0		0	0	0	0	1	0	0	0	0	0	0	1	1	7.22	1.01108	0	0	0	0	0	0	0
Leah Bouterse	10/24/2016	13:00:00	0	7.3m	0	3	1	1	1	0	0	2	0	0	0	0	0	1	0	0	0	0	0	0	1	1	9.92	0.735887	0	0	0	1	0	1	0
Leah Bouterse	10/24/2016	13:00:00	0	7.3m	0	3	1	1	1	0	0	2	0	0	0	0	0	1	0	0	0	0	0	0	1	1	9.12	0.800439	0	0	0	1	0	1	0
Leah Bouterse	10/24/2016	13:00:00	0	7.3m	0	3	1	1	1	0	0	2	0	0	0	0	0	1	0	0	0	0	0	0	1	1	9.32	0.783262	0	0	0	1	0	1	0
Leah Bouterse	10/24/2016	13:00:00	0	7.3m	0	3	1	1	1	0	0	2	0	0	0	0	0	1	0	0	0	0	0	0	1	1	13.1	0.557252	0	0	0	1	0	1	0
Leah Bouterse	10/24/2016	13:00:00	0	7.3m	0	3	1	1	1	0	0	2	0	0	0	0	0	1	0	0	0	0	0	0	1	1	8.38	0.871122	0	0	0	1	0	1	0
Leah Bouterse	10/24/2016	13:00:00	0	7.3m	0	3	1	1	1	0	0	2	0	0	0	0	0	1	0	0	0	0	0	0	1	1	9.39	0.777423	0	0	0	1	0	1	0
Leah Bouterse	10/24/2016	13:00:00	0	7.3m	0	3	1	1	1	0	0	2	0	0	0	0	0	1	0	0	0	0	0	0	1	1	8.78	0.831435	0	0	0	1	0	1	0
Leah Bouterse	10/24/2016	13:00:00	0	7.3m	0	3	1	1	1	0	0	2	0	0	0	0	0	1	0	0	0	0	0	0	1	1	13	0.561538	0	0	0	1	0	1	0
Leah Bouterse	10/24/2016	13:00:00	0	7.3m	0	3	1	1	1	0	0	2	0	0	0	0	0	1	0	0	0	0	0	0	1	1	9.19	0.794342	0	0	0	1	0	1	0
Leah Bouterse	10/24/2016	13:00:00	0	7.3m	0	3	1	1	1	0	0	2	0	0	0	0	0	1	0	0	0	0	0	0	1	1	10.27	0.710808	0	0	0	1	0	1	0
Leah Bouterse	10/24/2016	13:00:00	0	7.3m	0	3	1	1	1	0	0	2	0	0	0	0	0	1	0	0	0	0	0	0	1	1	12.02	0.607321	0	0	0	1	0	1	0
Leah Bouterse	10/24/2016	13:00:00	0	7.3m	0	3	1	1	1	0	0	2	0	0	0	0	0	1	0	0	0	0	0	0	1	1	11.01	0.663034	0	0	0	1	0	1	0
Leah Bouterse	10/24/2016	13:00:00	0	7.3m	0	3	1	1	1	0	0	2	0	0	0	0	0	1	0	0	0	0	0	0	1	1	8.63	0.845886	0	0	0	1	0	1	0
Leah Bouterse	10/24/2016	13:00:00	0	7.3m	0	3	1	1	1	1	0	2	0	0	0	0	0	1	0	0	0	0	0	0	1	1	9.2	0.793478	0	0	0	1	0	1	0
Leah Bouterse	10/24/2016	13:00:00	0	7.3m	0	3	1	1	1	1	0	2	0	0	0	0	0	1	0	0	0	0	0	0	1	1	9.39	0.777423	0	0	0	1	0	1	0
Leah Bouterse	10/24/2016	13:00:00	0	7.3m	0	3	1	1	1	1	0	2	0	0	0	0	0	1	0	0	0	0	0	0	1	1	7.46	0.978552	0	0	0	1	0	1	0
Leah Bouterse	10/24/2016	13:00:00	0	7.3m	0	3	1	1	1	2	0	2	0	0	0	0	0	1	0	0	0	0	0	0	1	1	9.63	0.758048	0	0	0	1	0	1	0
Leah Bouterse	10/24/2016	13:00:00	0	7.3m	0	3	1	1	1	2	0	2	0	0	0	0	0	1	0	0	0	0	0	0	1	1	9.23	0.790899	0	0	0	1	0	1	0
Leah Bouterse	10/24/2016	13:00:00	0	7.3m	0	3	1	1	1	2	0	2	0	0	0	0	0	1	0	0	0	0	0	0	1	1	6.92	1.05491	0	0	0	1	0	1	0
Leah Bouterse	10/24/2016	13:00:00	0	7.3m	0	3	1	1	1	2	0	2	0	0	0	0	0	1	0	0	0	0	0	0	1	1	9.78	0.746421	0	0	0	1	0	1	0
Leah Bouterse	10/24/2016	13:00:00	0	7.3m	0	3	1	1	1	2	0	2	0	0	0	0	0	1	0	0	0	0	0	0	1	1	8.09	0.902349	0	0	0	1	0	1	0
Leah Bouterse	10/24/2016	13:00:00	0	7.3m	0	3	1	1	1	2	0	2	0	0	0	0	0	1	0	0	0	0	0	0	1	1	9.62	0.758836	0	0	0	1	0	1	0
Leah Bouterse	10/24/2016	13:00:00	0	7.3m	0	3	1	1	1	2	0	2	0	0	0	0	0	1	0	0	0	0	0	0	1	1	7.92	0.921717	0	0	0	1	0	1	0
Leah Bouterse	10/24/2016	13:00:00	0	7.3m	0	3	1	1	1	2	0	2	0	0	0	0	0	1	0	0	0	0	0	0	1	1	11.3	0.646018	0	0	0	1	0	1	0
Leah Bouterse	10/24/2016	13:00:00	0	7.3m	0	3	1	1	1	2	0	2	0	0	0	0	0	1	0	0	0	0	0	0	1	1	10.09	0.723489	0	0	0	1	0	1	0
Leah Bouterse	10/24/2016	13:00:00	0	7.3m	0	3	1	1	1	2	0	2	0	0	0	0	0	1	0	0	0	0	0	0	1	1	11.02	0.662432	0	0	0	1	0	1	0
Leah Bouterse	10/24/2016	13:00:00	0	7.3m	0	3	1	1	1	0	0	3	1	0	0	0	0	1	0	0	0	0	0	0	1	1	8.35	0.874251	0	0	0	1	0	1	0
Leah Bouterse	10/24/2016	13:00:00	0	7.3m	0	3	1	1	1	0	0	3	1	0	0	0	0	1	0	0	0	0	0	0	1	1	7.73	0.944373	0	0	0	1	0	1	0
Leah Bouterse	10/24/2016	13:00:00	0	7.3m	0	3	1	1	1	1	0	3	2	0	0	0	0	1	0	0	0	0	0	0	1	1	11.02	0.662432	0	0	0	1	0	1	0
Leah Bouterse	10/24/2016	13:00:00	0	7.3m	0	3	1	1	1	1	0	3	1	0	0	0	0	1	0	0	0	0	0	0	1	1	9.08	0.803965	0	0	0	1	0	1	0
Leah Bouterse	10/24/2016	13:00:00	0	7.3m	0	3	1	1	1	1	0	3	1	0	0	0	0	1	0	0	0	0	0	0	1	1	8.02	0.910224	0	0	0	1	0	1	0
Leah Bouterse	10/24/2016	13:00:00	0	7.3m	0	3	1	1	1	2	0	3	1	0	0	0	0	1	0	0	0	0	0	0	1	1	9.43	0.774125	0	0	0	1	0	1	0
Leah Bouterse	10/24/2016	13:00:00	0	7.3m	0	3	1	1	1	2	0	3	1	0	0	0	0	1	0	0	0	0	0	0	1	1	10.32	0.707364	0	0	0	1	0	1	0
Leah Bouterse	10/24/2016	13:00:00	0	7.3m	0	3	1	1	1	2	0	3	1	0	0	0	0	1	0	0	0	0	0	0	1	1	10.03	0.727817	0	0	0	1	0	1	0
Leah Bouterse	10/24/2016	13:00:00	0	7.3m	0	3	1	1	1	2	0	3	1	0	0	0	0	1	0	0	0	0	0	0	1	1	9.92	0.735887	0	0	0	1	0	1	0
Leah Bouterse	10/24/2016	13:00:00	0	7.3m	0	3	1	1	1	2	0	3	1	0	0	0	0	1	0	0	0	0	0	0	1	1	7.05	1.03546	0	0	0	1	0	1	0
Leah Bouterse	10/24/2016	13:00:00	0	7.3m	0	2	0	1	1	0	1	1		0	0	0	1	0	0	0	0	0	0	1	0	1	6.45	1.13178	0	0	0	0	0	0	0
Leah Bouterse	10/24/2016	13:00:00	0	7.3m	0	2	0	1	1	0	1	1		0	0	0	1	0	0	0	0	0	0	1	0	1	6.57	1.11111	0	0	0	0	0	0	0
Leah Bouterse	10/24/2016	13:00:00	0	7.3m	0	2	0	1	1	2	1	1		0	0	0	1	0	0	0	0	0	0	1	0	1	6.78	1.0767	0	0	0	0	0	0	0
Leah Bouterse	10/24/2016	13:00:00	0	7.3m	0	2	0	1	1	2	1	1		0	0	0	1	0	0	0	0	0	0	1	0	1	6.5	1.12308	0	0	0	0	0	0	0
Leah Bouterse	10/24/2016	13:00:00	0	7.3m	0	2	0	1	1	2	1	1		0	0	0	1	0	0	0	0	0	0	1	0	1	6.38	1.1442	0	0	0	0	0	0	0
Leah Bouterse	10/24/2016	13:00:00	0	7.3m	0	2	0	1	1	2	1	1		0	0	0	1	0	0	0	0	0	0	1	0	1	10.87	0.671573	0	0	0	0	0	0	0
Leah Bouterse	10/24/2016	13:00:00	0	7.3m	0	2	0	1	1	2	1	1		0	0	0	1	0	0	0	0	0	0	1	0	1	6.47	1.12828	0	0	0	0	0	0	0
Leah Bouterse	10/24/2016	13:00:00	0	7.3m	0	2	0	1	1	2	1	1		0	0	0	1	0	0	0	0	0	0	1	0	1	5.37	1.3594	0	0	0	0	0	0	0
Leah Bouterse	10/24/2016	13:00:00	0	7.3m	0	2	0	1	1	2	1	1		0	0	0	1	0	0	0	0	0	0	1	0	1	6.7	1.08955	0	0	0	0	0	0	0
Leah Bouterse	10/24/2016	13:00:00	0	7.3m	0	2	0	1	1	2	1	1		0	0	0	1	0	0	0	0	0	0	1	0	1	6.4	1.14062	0	0	0	0	0	0	0
Leah Bouterse	10/24/2016	13:00:00	0	7.3m	0	2	0	1	1	2	1	1		0	0	0	1	0	0	0	0	0	0	1	0	1	8.59	0.849825	0	0	0	0	0	0	0
Leah Bouterse	10/24/2016	13:00:00	0	7.3m	0	2	0	1	1	2	1	1		0	0	0	1	0	0	0	0	0	0	1	0	1	11.21	0.651204	0	0	0	0	0	0	0
Leah Bouterse	10/24/2016	13:00:00	0	7.3m	0	2	0	1	1	2	1	2		0	0	0	1	0	0	0	0	0	0	1	0	1	6.75	1.08148	0	0	0	0	0	0	0
Leah Bouterse	10/24/2016	13:00:00	0	7.3m	0	2	0	1	1	2	1	2		0	0	0	1	0	0	0	0	0	0	1	0	1	7	1.04286	0	0	0	0	0	0	0
Leah Bouterse	10/24/2016	13:00:00	0	7.3m	0	2	0	1	1	2	1	2		0	0	0	1	0	0	0	0	0	0	1	0	1	8.55	0.853801	0	0	0	0	0	0	0
Leah Bouterse	10/24/2016	13:00:00	0	7.3m	0	2	0	1	1	2	1	2		0	0	0	1	0	0	0	0	0	0	1	0	1	7.32	0.997268	0	0	0	0	0	0	0
Leah Bouterse	10/24/2016	13:00:00	0	7.3m	0	2	0	1	1	2	1	2		0	0	0	1	0	0	0	0	0	0	1	0	1	8.32	0.877404	0	0	0	0	0	0	0
Leah Bouterse	10/24/2016	13:00:00	0	7.3m	0	2	0	1	1	2	1	2		0	0	0	1	0	0	0	0	0	0	1	0	1	9.13	0.799562	0	0	0	0	0	0	0
Leah Bouterse	10/24/2016	13:00:00	0	7.3m	0	2	0	1	1	2	1	2		0	0	0	1	0	0	0	0	0	0	1	0	1	5.41	1.34935	0	0	0	0	0	0	0
Leah Bouterse	10/24/2016	13:00:00	0	7.3m	0	2	0	1	1	2	1	2		0	0	0	1	0	0	0	0	0	0	1	0	1	6.28	1.16242	0	0	0	0	0	0	0
Leah Bouterse	10/24/2016	13:00:00	0	7.3m	0	3	1	1	1	0	1	1		0	0	0	0	1	0	0	0	0	0	0	1	1	7.57	0.964333	0	0	0	0	0	0	0
Leah Bouterse	10/24/2016	13:00:00	0	7.3m	0	3	1	1	1	0	1	1		0	0	0	0	1	0	0	0	0	0	0	1	1	7.7	0.948052	0	0	0	0	0	0	0
Leah Bouterse	10/24/2016	13:00:00	0	7.3m	0	3	1	1	1	0	1	1		0	0	0	0	1	0	0	0	0	0	0	1	1	6.76	1.07988	0	0	0	0	0	0	0
Leah Bouterse	10/24/2016	13:00:00	0	7.3m	0	3	1	1	1	2	1	1		0	0	0	0	1	0	0	0	0	0	0	1	1	8.8	0.829545	0	0	0	0	0	0	0
Leah Bouterse	10/24/2016	13:00:00	0	7.3m	0	3	1	1	1	2	1	1		0	0	0	0	1	0	0	0	0	0	0	1	1	8.21	0.88916	0	0	0	0	0	0	0
Leah Bouterse	10/24/2016	13:00:00	0	7.3m	0	3	1	1	1	2	1	1		0	0	0	0	1	0	0	0	0	0	0	1	1	7.25	1.0069	0	0	0	0	0	0	0
Leah Bouterse	10/24/2016	13:00:00	0	7.3m	0	3	1	1	1	2	1	1		0	0	0	0	1	0	0	0	0	0	0	1	1	7.71	0.946822	0	0	0	0	0	0	0
Leah Bouterse	10/24/2016	13:00:00	0	7.3m	0	3	1	1	1	2	1	1		0	0	0	0	1	0	0	0	0	0	0	1	1	7.75	0.941935	0	0	0	0	0	0	0
Leah Bouterse	10/24/2016	13:00:00	0	7.3m	0	3	1	1	1	2	1	1		0	0	0	0	1	0	0	0	0	0	0	1	1	6.27	1.16427	0	0	0	0	0	0	0
Leah Bouterse	10/24/2016	13:00:00	0	7.3m	0	3	1	1	1	2	1	1		0	0	0	0	1	0	0	0	0	0	0	1	1	9.58	0.762004	0	0	0	0	0	0	0
Leah Bouterse	10/24/2016	13:00:00	0	7.3m	0	3	1	1	1	2	1	1		0	0	0	0	1	0	0	0	0	0	0	1	1	9.05	0.80663	0	0	0	0	0	0	0
Leah Bouterse	10/24/2016	13:00:00	0	7.3m	0	3	1	1	1	2	1	2		0	0	0	0	1	0	0	0	0	0	0	1	1	9.17	0.796074	0	0	0	0	0	0	0
Leah Bouterse	10/24/2016	13:00:00	0	7.3m	0	3	1	1	1	2	1	2		0	0	0	0	1	0	0	0	0	0	0	1	1	6.05	1.20661	0	0	0	0	0	0	0
Leah Bouterse	10/24/2016	13:00:00	0	7.3m	0	3	1	1	1	2	1	2		0	0	0	0	1	0	0	0	0	0	0	1	1	7.62	0.958005	0	0	0	0	0	0	0
Leah Bouterse	10/24/2016	13:00:00	0	7.3m	0	3	1	1	1	2	1	2		0	0	0	0	1	0	0	0	0	0	0	1	1	7.2	1.01389	0	0	0	0	0	0	0
Leah Bouterse	10/24/2016	13:00:00	0	7.3m	0	3	1	1	1	2	1	2		0	0	0	0	1	0	0	0	0	0	0	1	1	6.26	1.16613	0	0	0	0	0	0	0
Leah Bouterse	10/24/2016	13:00:00	0	7.3m	0	2	0	1	1	2	2	1		0	0	0	1	0	0	0	0	0	0	1	0	1	8.08	0.903465	0	0	0	0	0	0	0
Leah Bouterse	10/24/2016	13:00:00	0	7.3m	0	2	0	1	1	0	2	1		0	0	0	1	0	0	0	0	0	0	1	0	1	10.49	0.695901	0	0	0	0	0	0	0
Leah Bouterse	10/24/2016	13:00:00	0	7.3m	0	2	0	1	1	0	2	1		0	0	0	1	0	0	0	0	0	0	1	0	1	8.07	0.904585	0	0	0	0	0	0	0
Leah Bouterse	10/24/2016	13:00:00	0	7.3m	0	4	0	2	1	1	2	1		0	0	0	0	0	1	0	0	0	0	1	0	1	5.8	1.25862	0	0	0	0	0	0	0
Leah Bouterse	10/24/2016	13:00:00	0	7.3m	0	2	0	1	1	2	2	1		0	0	0	1	0	0	0	0	0	0	1	0	1	9.83	0.742625	0	0	0	0	0	0	0
Leah Bouterse	10/24/2016	13:00:00	0	7.3m	0	2	0	1	1	2	2	1		0	0	0	1	0	0	0	0	0	0	1	0	1	7.42	0.983827	0	0	0	0	0	0	0
Leah Bouterse	10/24/2016	13:00:00	0	7.3m	0	2	0	1	1	2	2	1		0	0	0	1	0	0	0	0	0	0	1	0	1	6.15	1.18699	0	0	0	0	0	0	0
Leah Bouterse	10/24/2016	13:00:00	0	7.3m	0	2	0	1	1	2	2	1		0	0	0	1	0	0	0	0	0	0	1	0	1	9.27	0.787487	0	0	0	0	0	0	0
Leah Bouterse	10/24/2016	13:00:00	0	7.3m	0	2	0	1	1	2	2	1		0	0	0	1	0	0	0	0	0	0	1	0	1	6.71	1.08793	0	0	0	0	0	0	0
Leah Bouterse	10/24/2016	13:00:00	0	7.3m	0	2	0	1	1	2	2	1		0	0	0	1	0	0	0	0	0	0	1	0	1	6.77	1.07829	0	0	0	0	0	0	0
Leah Bouterse	10/24/2016	13:00:00	0	7.3m	0	2	0	1	1	2	2	1		0	0	0	1	0	0	0	0	0	0	1	0	1	7.8	0.935897	0	0	0	0	0	0	0
Leah Bouterse	10/24/2016	13:00:00	0	7.3m	0	2	0	1	1	2	2	1		0	0	0	1	0	0	0	0	0	0	1	0	1	9.17	0.796074	0	0	0	0	0	0	0
Leah Bouterse	10/24/2016	13:00:00	0	7.3m	0	2	0	1	1	2	2	1		0	0	0	1	0	0	0	0	0	0	1	0	1	6.48	1.12654	0	0	0	0	0	0	0
Leah Bouterse	10/24/2016	13:00:00	0	7.3m	0	2	0	1	1	3	2	1		0	0	0	1	0	0	0	0	0	0	1	0	1	5.52	1.32246	0	0	0	0	0	0	0
Leah Bouterse	10/24/2016	13:00:00	0	7.3m	0	2	0	1	1	3	2	1		0	0	0	1	0	0	0	0	0	0	1	0	1	5.97	1.22278	0	0	0	0	0	0	0
Leah Bouterse	10/24/2016	13:00:00	0	7.3m	0	2	0	1	1	0	2	2		0	0	0	1	0	0	0	0	0	0	1	0	1	8.78	0.831435	0	0	0	0	0	0	0
Leah Bouterse	10/24/2016	13:00:00	0	7.3m	0	2	0	1	1	1	2	2		0	0	0	1	0	0	0	0	0	0	1	0	1	6.05	1.20661	0	0	0	0	0	0	0
Leah Bouterse	10/24/2016	13:00:00	0	7.3m	0	2	0	1	1	1	2	2		0	0	0	1	0	0	0	0	0	0	1	0	1	7.62	0.958005	0	0	0	0	0	0	0
Leah Bouterse	10/24/2016	13:00:00	0	7.3m	0	2	0	1	1	1	2	2		0	0	0	1	0	0	0	0	0	0	1	0	1	10.29	0.709427	0	0	0	0	0	0	0
Leah Bouterse	10/24/2016	13:00:00	0	7.3m	0	2	0	1	1	1	2	2		0	0	0	1	0	0	0	0	0	0	1	0	1	7.67	0.95176	0	0	0	0	0	0	0
Leah Bouterse	10/24/2016	13:00:00	0	7.3m	0	2	0	1	1	1	2	2		0	0	0	1	0	0	0	0	0	0	1	0	1	6.62	1.10272	0	0	0	0	0	0	0
Leah Bouterse	10/24/2016	13:00:00	0	7.3m	0	0	0	0	1	2	2	2		0	1	0	0	0	0	0	0	0	0	1	0	1	7.98	0.914787	0	0	0	0	0	0	0
Leah Bouterse	10/24/2016	13:00:00	0	7.3m	0	2	0	1	1	2	2	2		0	0	0	1	0	0	0	0	0	0	1	0	1	7.58	0.963061	0	0	0	0	0	0	0
Leah Bouterse	10/24/2016	13:00:00	0	7.3m	0	4	0	2	1	2	2	2		0	0	0	0	0	1	0	0	0	0	1	0	1	5.48	1.33212	0	0	0	0	0	0	0
Leah Bouterse	10/24/2016	13:00:00	0	7.3m	0	2	0	1	1	3	2	2		0	0	0	1	0	0	0	0	0	0	1	0	1	6.83	1.06881	0	0	0	0	0	0	0
Leah Bouterse	10/24/2016	13:00:00	0	7.3m	0	2	0	1	1	0	2	3		0	0	0	1	0	0	0	0	0	0	1	0	1	7.92	0.921717	0	0	0	0	0	0	0
Leah Bouterse	10/24/2016	13:00:00	0	7.3m	0	2	0	1	1	2	2	3		0	0	0	1	0	0	0	0	0	0	1	0	1	6.73	1.0847	0	0	0	0	0	0	0
Leah Bouterse	10/24/2016	13:00:00	0	7.3m	0	2	0	1	1	2	2	3		0	0	0	1	0	0	0	0	0	0	1	0	1	8.28	0.881643	0	0	0	0	0	0	0
Leah Bouterse	10/24/2016	13:00:00	0	7.3m	0	2	0	1	1	2	2	3		0	0	0	1	0	0	0	0	0	0	1	0	1	5.47	1.33455	0	0	0	0	0	0	0
Leah Bouterse	10/24/2016	13:00:00	0	7.3m	0	2	0	1	1	3	2	3		0	0	0	1	0	0	0	0	0	0	1	0	1	4.89	1.49284	0	0	0	0	0	0	0
Leah Bouterse	10/24/2016	13:00:00	0	7.3m	0	2	0	1	1	3	2	3		0	0	0	1	0	0	0	0	0	0	1	0	1	7.97	0.915935	0	0	0	0	0	0	0
Leah Bouterse	10/24/2016	13:00:00	0	7.3m	0	3	1	1	1	0	2	1		0	0	0	0	1	0	0	0	0	0	0	1	1	8.65	0.843931	0	0	0	0	0	0	0
Leah Bouterse	10/24/2016	13:00:00	0	7.3m	0	3	1	1	1	0	2	1		0	0	0	0	1	0	0	0	0	0	0	1	1	11.32	0.644876	0	0	0	0	0	0	0
Leah Bouterse	10/24/2016	13:00:00	0	7.3m	0	3	1	1	1	0	2	1		0	0	0	0	1	0	0	0	0	0	0	1	1	9.37	0.779082	0	0	0	0	0	0	0
Leah Bouterse	10/24/2016	13:00:00	0	7.3m	0	3	1	1	1	0	2	1		0	0	0	0	1	0	0	0	0	0	0	1	1	9	0.811111	0	0	0	0	0	0	0
Leah Bouterse	10/24/2016	13:00:00	0	7.3m	0	3	1	1	1	1	2	1		0	0	0	0	1	0	0	0	0	0	0	1	1	7.28	1.00275	0	0	0	0	0	0	0
Leah Bouterse	10/24/2016	13:00:00	0	7.3m	0	3	1	1	1	1	2	1		0	0	0	0	1	0	0	0	0	0	0	1	1	8.6	0.848837	0	0	0	0	0	0	0
Leah Bouterse	10/24/2016	13:00:00	0	7.3m	0	1	1	0	1	2	2	1		0	0	1	0	0	0	0	0	0	0	0	1	1	12.02	0.607321	0	0	0	0	0	0	0
Leah Bouterse	10/24/2016	13:00:00	0	7.3m	0	3	1	1	1	2	2	1		0	0	0	0	1	0	0	0	0	0	0	1	1	8.88	0.822072	0	0	0	0	0	0	0
Leah Bouterse	10/24/2016	13:00:00	0	7.3m	0	3	1	1	1	2	2	1		0	0	0	0	1	0	0	0	0	0	0	1	1	7.18	1.01671	0	0	0	0	0	0	0
Leah Bouterse	10/24/2016	13:00:00	0	7.3m	0	3	1	1	1	2	2	1		0	0	0	0	1	0	0	0	0	0	0	1	1	7.9	0.924051	0	0	0	0	0	0	0
Leah Bouterse	10/24/2016	13:00:00	0	7.3m	0	3	1	1	1	2	2	1		0	0	0	0	1	0	0	0	0	0	0	1	1	5.28	1.38258	0	0	0	0	0	0	0
Leah Bouterse	10/24/2016	13:00:00	0	7.3m	0	3	1	1	1	2	2	1		0	0	0	0	1	0	0	0	0	0	0	1	1	11.1	0.657658	0	0	0	0	0	0	0
Leah Bouterse	10/24/2016	13:00:00	0	7.3m	0	3	1	1	1	2	2	1		0	0	0	0	1	0	0	0	0	0	0	1	1	9.78	0.746421	0	0	0	0	0	0	0
Leah Bouterse	10/24/2016	13:00:00	0	7.3m	0	3	1	1	1	2	2	1		0	0	0	0	1	0	0	0	0	0	0	1	1	10.75	0.67907	0	0	0	0	0	0	0
Leah Bouterse	10/24/2016	13:00:00	0	7.3m	0	3	1	1	1	2	2	1		0	0	0	0	1	0	0	0	0	0	0	1	1	7.93	0.920555	0	0	0	0	0	0	0
Leah Bouterse	10/24/2016	13:00:00	0	7.3m	0	3	1	1	1	2	2	1		0	0	0	0	1	0	0	0	0	0	0	1	1	8.5	0.858824	0	0	0	0	0	0	0
Leah Bouterse	10/24/2016	13:00:00	0	7.3m	0	3	1	1	1	2	2	1		0	0	0	0	1	0	0	0	0	0	0	1	1	8.15	0.895706	0	0	0	0	0	0	0
Leah Bouterse	10/24/2016	13:00:00	0	7.3m	0	3	1	1	1	2	2	1		0	0	0	0	1	0	0	0	0	0	0	1	1	9.5	0.768421	0	0	0	0	0	0	0
Leah Bouterse	10/24/2016	13:00:00	0	7.3m	0	3	1	1	1	2	2	1		0	0	0	0	1	0	0	0	0	0	0	1	1	7.85	0.929936	0	0	0	0	0	0	0
Leah Bouterse	10/24/2016	13:00:00	0	7.3m	0	3	1	1	1	2	2	1		0	0	0	0	1	0	0	0	0	0	0	1	1	6.29	1.16057	0	0	0	0	0	0	0
Leah Bouterse	10/24/2016	13:00:00	0	7.3m	0	3	1	1	1	2	2	1		0	0	0	0	1	0	0	0	0	0	0	1	1	8.27	0.882709	0	0	0	0	0	0	0
Leah Bouterse	10/24/2016	13:00:00	0	7.3m	0	3	1	1	1	2	2	1		0	0	0	0	1	0	0	0	0	0	0	1	1	8.95	0.815642	0	0	0	0	0	0	0
Leah Bouterse	10/24/2016	13:00:00	0	7.3m	0	3	1	1	1	3	2	1		0	0	0	0	1	0	0	0	0	0	0	1	1	8.5	0.858824	0	0	0	0	0	0	0
Leah Bouterse	10/24/2016	13:00:00	0	7.3m	0	3	1	1	1	3	2	1		0	0	0	0	1	0	0	0	0	0	0	1	1	9.53	0.766002	0	0	0	0	0	0	0
Leah Bouterse	10/24/2016	13:00:00	0	7.3m	0	3	1	1	1	3	2	1		0	0	0	0	1	0	0	0	0	0	0	1	1	8.65	0.843931	0	0	0	0	0	0	0
Leah Bouterse	10/24/2016	13:00:00	0	7.3m	0	3	1	1	1	3	2	1		0	0	0	0	1	0	0	0	0	0	0	1	1	9	0.811111	0	0	0	0	0	0	0
Leah Bouterse	10/24/2016	13:00:00	0	7.3m	0	3	1	1	1	3	2	1		0	0	0	0	1	0	0	0	0	0	0	1	1	7.28	1.00275	0	0	0	0	0	0	0
Leah Bouterse	10/24/2016	13:00:00	0	7.3m	0	3	1	1	1	1	2	2		0	0	0	0	1	0	0	0	0	0	0	1	1	7.45	0.979866	0	0	0	0	0	0	0
Leah Bouterse	10/24/2016	13:00:00	0	7.3m	0	3	1	1	1	1	2	2		0	0	0	0	1	0	0	0	0	0	0	1	1	8.26	0.883777	0	0	0	0	0	0	0
Leah Bouterse	10/24/2016	13:00:00	0	7.3m	0	3	1	1	1	2	2	2		0	0	0	0	1	0	0	0	0	0	0	1	1	8.4	0.869048	0	0	0	0	0	0	0
Leah Bouterse	10/24/2016	13:00:00	0	7.3m	0	3	1	1	1	2	2	2		0	0	0	0	1	0	0	0	0	0	0	1	1	8.68	0.841014	0	0	0	0	0	0	0
Leah Bouterse	10/24/2016	13:00:00	0	7.3m	0	3	1	1	1	2	2	2		0	0	0	0	1	0	0	0	0	0	0	1	1	9.6	0.760417	0	0	0	0	0	0	0
Leah Bouterse	10/24/2016	13:00:00	0	7.3m	0	1	1	0	1	3	2	2		0	0	1	0	0	0	0	0	0	0	0	1	1	11.02	0.662432	0	0	0	0	0	0	0
Leah Bouterse	10/24/2016	13:00:00	0	7.3m	0	3	1	1	1	3	2	2		0	0	0	0	1	0	0	0	0	0	0	1	1	8.47	0.861865	0	0	0	0	0	0	0
Leah Bouterse	10/24/2016	13:00:00	0	7.3m	0	3	1	1	1	3	2	2		0	0	0	0	1	0	0	0	0	0	0	1	1	10.89	0.67034	0	0	0	0	0	0	0
Leah Bouterse	10/24/2016	13:00:00	0	7.3m	0	3	1	1	1	3	2	2		0	0	0	0	1	0	0	0	0	0	0	1	1	8.2	0.890244	0	0	0	0	0	0	0
Leah Bouterse	10/24/2016	13:00:00	0	7.3m	0	3	1	1	1	3	2	2		0	0	0	0	1	0	0	0	0	0	0	1	1	7.62	0.958005	0	0	0	0	0	0	0
Leah Bouterse	10/24/2016	13:00:00	0	7.3m	0	3	1	1	1	3	2	2		0	0	0	0	1	0	0	0	0	0	0	1	1	6.35	1.14961	0	0	0	0	0	0	0
Leah Bouterse	10/24/2016	13:00:00	0	7.3m	0	3	1	1	1	3	2	2		0	0	0	0	1	0	0	0	0	0	0	1	1	7.95	0.918239	0	0	0	0	0	0	0
Leah Bouterse	10/24/2016	13:00:00	0	7.3m	0	3	1	1	1	3	2	2		0	0	0	0	1	0	0	0	0	0	0	1	1	9.63	0.758048	0	0	0	0	0	0	0
Leah Bouterse	10/24/2016	13:00:00	0	7.3m	0	3	1	1	1	3	2	2		0	0	0	0	1	0	0	0	0	0	0	1	1	7.93	0.920555	0	0	0	0	0	0	0
Leah Bouterse	10/24/2016	13:00:00	0	7.3m	0	3	1	1	1	3	2	2		0	0	0	0	1	0	0	0	0	0	0	1	1	10.23	0.713587	0	0	0	0	0	0	0
Leah Bouterse	10/24/2016	13:00:00	0	7.3m	0	3	1	1	1	3	2	2		0	0	0	0	1	0	0	0	0	0	0	1	1	9.2	0.793478	0	0	0	0	0	0	0
Leah Bouterse	10/24/2016	13:00:00	0	7.3m	0	3	1	1	1	3	2	2		0	0	0	0	1	0	0	0	0	0	0	1	1	8.75	0.834286	0	0	0	0	0	0	0
Leah Bouterse	10/24/2016	13:00:00	0	7.3m	0	3	1	1	1	0	2	3		0	0	0	0	1	0	0	0	0	0	0	1	1	9.03	0.808416	0	0	0	0	0	0	0
Leah Bouterse	10/24/2016	13:00:00	0	7.3m	0	3	1	1	1	0	2	3		0	0	0	0	1	0	0	0	0	0	0	1	1	11.67	0.625536	0	0	0	0	0	0	0
Leah Bouterse	10/24/2016	13:00:00	0	7.3m	0	3	1	1	1	1	2	3		0	0	0	0	1	0	0	0	0	0	0	1	1	8.05	0.906832	0	0	0	0	0	0	0
Leah Bouterse	10/24/2016	13:00:00	0	7.3m	0	3	1	1	1	2	1	2		1	0	0	0	2	0	0	1	0	0	1	2	3	15.57	0.46885	0	0	0	1	0	2	4
Leah Bouterse	10/24/2016	13:00:00	0	7.3m	0	2	0	1	0			0		1	0	0	2	0	0	0	0	0	0	2	0	2	5.27	1.3852	1	0	0	0	1	0	1
Leah Bouterse	10/24/2016	13:00:00	0	7.3m	0	2	0	1	0			0		1	0	0	2	0	0	0	0	0	0	2	0	2	9.18	0.795207	1	0	0	0	1	0	1
Leah Bouterse	10/24/2016	13:00:00	0	7.3m	0	2	0	1	1	2	1	1		1	0	0	2	0	0	0	0	0	0	2	0	2	7.02	1.03989	1	0	0	0	1	0	1
Leah Bouterse	10/24/2016	13:00:00	0	7.3m	0	2	0	1	1	2	1	1		1	0	0	2	0	0	0	0	0	0	2	0	2	7.67	0.95176	1	0	0	0	1	0	1
Leah Bouterse	10/24/2016	13:00:00	0	7.3m	0	2	0	1	1	2	1	1		1	0	0	2	0	0	0	0	0	0	2	0	2	11.42	0.639229	1	0	0	0	1	0	1
Leah Bouterse	10/24/2016	13:00:00	0	7.3m	0	3	1	1	1	2	1	2		1	0	0	1	1	0	0	0	0	0	1	1	2	8.72	0.837156	1	0	0	0	1	0	6
Leah Bouterse	10/24/2016	13:00:00	0	7.3m	0	2	0	1	1	0	2	1		1	0	0	2	0	0	0	0	0	0	2	0	2	8.22	0.888078	1	0	0	0	1	0	1
Leah Bouterse	10/24/2016	13:00:00	0	7.3m	0	2	0	1	1	1	2	2		1	0	0	2	0	0	0	0	0	0	2	0	2	8.01	0.911361	1	0	0	0	1	0	1
Leah Bouterse	10/24/2016	13:00:00	0	7.3m	0	4	0	2	1	1	2	2		1	0	0	0	0	2	0	0	0	0	2	0	2	5.57	1.31059	1	0	0	0	1	0	1
Leah Bouterse	10/24/2016	13:00:00	0	7.3m	0	2	0	1	1	3	2	2		1	0	0	2	0	0	0	0	0	0	2	0	2	8.42	0.866983	1	0	0	0	1	0	1
Leah Bouterse	10/24/2016	13:00:00	0	7.3m	0	2	0	1	1	3	2	3		1	0	0	2	0	0	0	0	0	0	2	0	2	8.35	0.874251	1	0	0	0	1	0	1
Leah Bouterse	10/24/2016	13:00:00	0	7.3m	0	3	1	1	1	2	2	1		1	0	0	1	1	0	0	0	0	0	1	1	2	10.7	0.682243	1	0	0	0	1	0	6
Leah Bouterse	10/24/2016	13:00:00	0	7.3m	0	3	1	1	1	3	2	1		1	0	0	1	1	0	0	0	0	0	1	1	2	9.22	0.791757	1	0	0	0	1	0	6
Leah Bouterse	10/24/2016	13:00:00	0	7.3m	0	3	1	1	1	3	2	1		1	0	0	1	1	0	0	0	0	0	1	1	2	10.05	0.726368	1	0	0	0	1	0	6
Leah Bouterse	10/24/2016	13:00:00	0	7.3m	0	3	1	1	1	1	2	2		1	0	0	1	1	0	0	0	0	0	1	1	2	8.52	0.856808	1	0	0	0	1	0	6
Leah Bouterse	10/24/2016	13:00:00	0	7.3m	0	3	1	1	1	2	2	2		1	0	0	1	1	0	0	0	0	0	1	1	2	7.35	0.993197	1	0	0	0	1	0	6
Leah Bouterse	10/24/2016	13:00:00	0	7.3m	0	3	1	1	1	3	2	2		1	0	0	1	1	0	0	0	0	0	1	1	2	8.9	0.820225	1	0	0	0	1	0	6
Leah Bouterse	10/24/2016	13:00:00	0	7.3m	0	2	0	1	1	0	2	1		1	0	0	1	1	0	0	0	0	0	1	1	2	8.73	0.836197	0	1	0	0	2	0	6
Leah Bouterse	10/24/2016	13:00:00	0	7.3m	0	2	0	1	1	1	2	2		1	0	0	1	1	0	0	0	0	0	1	1	2	10.08	0.724206	0	1	0	0	2	0	6
Leah Bouterse	10/24/2016	13:00:00	0	7.3m	0	3	1	1	1	2	2	1		1	0	0	0	2	0	0	0	0	0	0	2	2	11.44	0.638112	0	1	0	0	2	0	2
Leah Bouterse	10/24/2016	13:00:00	0	7.3m	0	3	1	1	1	2	2	1		1	0	0	0	2	0	0	0	0	0	0	2	2	8.85	0.824859	0	1	0	0	2	0	2
Leah Bouterse	10/24/2016	13:00:00	0	7.3m	0	3	1	1	1	2	2	1		1	0	0	0	2	0	0	0	0	0	0	2	2	8.85	0.824859	0	1	0	0	2	0	2
Leah Bouterse	10/24/2016	13:00:00	0	7.3m	0	3	1	1	1	3	2	1		1	0	0	0	2	0	0	0	0	0	0	2	2	10.02	0.728543	0	1	0	0	2	0	2
Leah Bouterse	10/24/2016	13:00:00	0	7.3m	0	3	1	1	1	1	2	2		1	0	0	0	2	0	0	0	0	0	0	2	2	7.21	1.01248	0	1	0	0	2	0	2
Leah Bouterse	10/24/2016	13:00:00	0	7.3m	0	3	1	1	1	3	2	2		1	0	0	0	2	0	0	0	0	0	0	2	2	9.55	0.764398	0	1	0	0	2	0	2
Leah Bouterse	10/24/2016	13:00:00	0	7.3m	0	3	1	1	0			0		1	0	0	0	1	0	0	1	0	0	1	1	2	7.06	1.03399	1	0	0	1	3	2	4
Leah Bouterse	10/24/2016	13:00:00	0	7.3m	0	3	1	1	1	1	0	3	1	1	0	0	1	1	0	0	1	0	0	2	1	3	7.73	0.944373	1	0	0	1	3	3	5
Leah Bouterse	10/24/2016	13:00:00	0	7.3m	0	3	1	1	1	3	2	2		1	0	0	1	1	0	0	1	0	0	2	1	3	7.27	1.00413	1	0	0	1	3	2	5
Leah Bouterse	10/24/2016	13:00:00	0	7.3m	0	3	1	1	1	2	0	2	0	1	0	0	0	2	0	0	0	0	0	0	2	2	10.93	0.667887	0	1	0	1	4	1	4
Leah Bouterse	10/24/2016	13:00:00	0	7.3m	0	3	1	1	1	2	0	3	1	1	0	0	0	1	0	0	0	1	0	0	2	2	13.19	0.55345	0	1	0	1	4	3	4
Leah Bouterse	10/24/2016	13:00:00	0	7.3m	0	2	0	1	1	2	2	1		1	0	0	1	0	0	0	0	1	0	1	1	2	12.1	0.603306	0	1	0	1	4	2	3
Leah Bouterse	10/24/2016	13:00:00	0	7.3m	0	3	1	1	1	0	2	2		1	0	0	0	1	0	0	0	1	0	0	2	2	9.75	0.748718	0	1	0	1	4	2	4
Leah Bouterse	10/24/2016	13:00:00	0	7.3m	0	3	1	1	1	3	2	2		1	0	0	0	1	0	0	0	1	0	0	2	2	10.25	0.712195	0	1	0	1	4	2	4
Leah Bouterse	10/24/2016	13:00:00	0	7.3m	0	3	1	1	1	2	0	2	0	1	0	0	0	2	0	0	1	0	0	1	2	3	10.92	0.668498	0	0	1	1	5	3	4
Leah Bouterse	10/24/2016	13:00:00	0	7.3m	0	3	1	1	1	2	0	3	1	1	0	0	0	2	0	0	1	0	0	1	2	3	12.3	0.593496	0	0	1	1	5	3	4
Leah Bouterse	10/24/2016	13:00:00	0	7.3m	0	3	1	1	1	1	0	2	0	1	0	0	0	1	0	0	1	2	0	1	3	4	11.42	0.639229	0	0	1	1	5	3	4
Leah Bouterse	10/24/2016	13:00:00	0	7.3m	0	3	1	1	1	2	1	1		1	0	0	1	2	0	0	0	0	0	1	2	3	9.13	0.799562	0	0	1	0	6	0	6
Leah Bouterse	10/24/2016	13:00:00	0	7.3m	0	3	1	1	1	2	1	2		1	0	0	1	2	0	0	0	0	0	1	2	3	9.4	0.776596	0	0	1	0	6	0	6
Leah Bouterse	10/31/2016	12:00:00	0	7.3m	0	2	0	1	0			0		0	0	0	1	0	0	0	0	0	0	1	0	1	13.69	0.533236	0	0	0	0	0	0	0
Leah Bouterse	10/31/2016	12:00:00	0	7.3m	0	2	0	1	0			0		0	0	0	1	0	0	0	0	0	0	1	0	1	6.67	1.09445	0	0	0	0	0	0	0
Leah Bouterse	10/31/2016	12:00:00	0	7.3m	0	2	0	1	0			0		0	0	0	1	0	0	0	0	0	0	1	0	1	7.88	0.926396	0	0	0	0	0	0	0
Leah Bouterse	10/31/2016	12:00:00	0	7.3m	0	2	0	1	1	2	0	3	1	0	0	0	1	0	0	0	0	0	0	1	0	1	9.44	0.773305	0	0	0	1	0	1	0
Leah Bouterse	10/31/2016	12:00:00	0	7.3m	0	3	1	1	1	0	0	2	0	0	0	0	0	1	0	0	0	0	0	0	1	1	10.15	0.719212	0	0	0	1	0	1	0
Leah Bouterse	10/31/2016	12:00:00	0	7.3m	0	3	1	1	1	0	0	2	0	0	0	0	0	1	0	0	0	0	0	0	1	1	8.91	0.819304	0	0	0	1	0	1	0
Leah Bouterse	10/31/2016	12:00:00	0	7.3m	0	3	1	1	1	0	0	2	0	0	0	0	0	1	0	0	0	0	0	0	1	1	10.91	0.669111	0	0	0	1	0	1	0
Leah Bouterse	10/31/2016	12:00:00	0	7.3m	0	3	1	1	1	0	0	2	0	0	0	0	0	1	0	0	0	0	0	0	1	1	10.92	0.668498	0	0	0	1	0	1	0
Leah Bouterse	10/31/2016	12:00:00	0	7.3m	0	3	1	1	1	0	0	2	0	0	0	0	0	1	0	0	0	0	0	0	1	1	9.6	0.760417	0	0	0	1	0	1	0
Leah Bouterse	10/31/2016	12:00:00	0	7.3m	0	3	1	1	1	0	0	2	0	0	0	0	0	1	0	0	0	0	0	0	1	1	9.58	0.762004	0	0	0	1	0	1	0
Leah Bouterse	10/31/2016	12:00:00	0	7.3m	0	3	1	1	1	1	0	2	0	0	0	0	0	1	0	0	0	0	0	0	1	1	8.6	0.848837	0	0	0	1	0	1	0
Leah Bouterse	10/31/2016	12:00:00	0	7.3m	0	3	1	1	1	1	0	2	0	0	0	0	0	1	0	0	0	0	0	0	1	1	10.85	0.672811	0	0	0	1	0	1	0
Leah Bouterse	10/31/2016	12:00:00	0	7.3m	0	3	1	1	1	2	0	2	0	0	0	0	0	1	0	0	0	0	0	0	1	1	9.1	0.802198	0	0	0	1	0	1	0
Leah Bouterse	10/31/2016	12:00:00	0	7.3m	0	3	1	1	1	2	0	2	0	0	0	0	0	1	0	0	0	0	0	0	1	1	9.23	0.790899	0	0	0	1	0	1	0
Leah Bouterse	10/31/2016	12:00:00	0	7.3m	0	3	1	1	1	2	0	2	0	0	0	0	0	1	0	0	0	0	0	0	1	1	8	0.9125	0	0	0	1	0	1	0
Leah Bouterse	10/31/2016	12:00:00	0	7.3m	0	3	1	1	1	0	0	3	1	0	0	0	0	1	0	0	0	0	0	0	1	1	7.87	0.927573	0	0	0	1	0	1	0
Leah Bouterse	10/31/2016	12:00:00	0	7.3m	0	3	1	1	1	2	0	3	1	0	0	0	0	1	0	0	0	0	0	0	1	1	7.19	1.0153	0	0	0	1	0	1	0
Leah Bouterse	10/31/2016	12:00:00	0	7.3m	0	3	1	1	1	2	0	3	1	0	0	0	0	1	0	0	0	0	0	0	1	1	8.89	0.821147	0	0	0	1	0	1	0
Leah Bouterse	10/31/2016	12:00:00	0	7.3m	0	3	1	1	1	2	0	3	1	0	0	0	0	1	0	0	0	0	0	0	1	1	7	1.04286	0	0	0	1	0	1	0
Leah Bouterse	10/31/2016	12:00:00	0	7.3m	0	3	1	1	1	2	0	3	1	0	0	0	0	1	0	0	0	0	0	0	1	1	8.6	0.848837	0	0	0	1	0	1	0
Leah Bouterse	10/31/2016	12:00:00	0	7.3m	0	3	1	1	1	2	0	3	1	0	0	0	0	1	0	0	0	0	0	0	1	1	8.91	0.819304	0	0	0	1	0	1	0
Leah Bouterse	10/31/2016	12:00:00	0	7.3m	0	2	0	1	1	0	1	1		0	0	0	1	0	0	0	0	0	0	1	0	1	6.7	1.08955	0	0	0	0	0	0	0
Leah Bouterse	10/31/2016	12:00:00	0	7.3m	0	0	0	0	1	2	1	1		0	1	0	0	0	0	0	0	0	0	1	0	1	7.62	0.958005	0	0	0	0	0	0	0
Leah Bouterse	10/31/2016	12:00:00	0	7.3m	0	2	0	1	1	2	1	1		0	0	0	1	0	0	0	0	0	0	1	0	1	6.06	1.20462	0	0	0	0	0	0	0
Leah Bouterse	10/31/2016	12:00:00	0	7.3m	0	2	0	1	1	2	1	1		0	0	0	1	0	0	0	0	0	0	1	0	1	6.7	1.08955	0	0	0	0	0	0	0
Leah Bouterse	10/31/2016	12:00:00	0	7.3m	0	2	0	1	1	2	1	1		0	0	0	1	0	0	0	0	0	0	1	0	1	5.5	1.32727	0	0	0	0	0	0	0
Leah Bouterse	10/31/2016	12:00:00	0	7.3m	0	2	0	1	1	2	1	2		0	0	0	1	0	0	0	0	0	0	1	0	1	6.78	1.0767	0	0	0	0	0	0	0
Leah Bouterse	10/31/2016	12:00:00	0	7.3m	0	2	0	1	1	2	1	2		0	0	0	1	0	0	0	0	0	0	1	0	1	6.75	1.08148	0	0	0	0	0	0	0
Leah Bouterse	10/31/2016	12:00:00	0	7.3m	0	2	0	1	1	2	1	2		0	0	0	1	0	0	0	0	0	0	1	0	1	8.6	0.848837	0	0	0	0	0	0	0
Leah Bouterse	10/31/2016	12:00:00	0	7.3m	0	3	1	1	1	2	1	1		0	0	0	0	1	0	0	0	0	0	0	1	1	7.48	0.975936	0	0	0	0	0	0	0
Leah Bouterse	10/31/2016	12:00:00	0	7.3m	0	3	1	1	1	2	1	1		0	0	0	0	1	0	0	0	0	0	0	1	1	10.1	0.722772	0	0	0	0	0	0	0
Leah Bouterse	10/31/2016	12:00:00	0	7.3m	0	3	1	1	1	2	1	2		0	0	0	0	1	0	0	0	0	0	0	1	1	5.8	1.25862	0	0	0	0	0	0	0
Leah Bouterse	10/31/2016	12:00:00	0	7.3m	0	3	1	1	1	2	1	2		0	0	0	0	1	0	0	0	0	0	0	1	1	10.12	0.721344	0	0	0	0	0	0	0
Leah Bouterse	10/31/2016	12:00:00	0	7.3m	0	2	0	1	1	0	2	1		0	0	0	1	0	0	0	0	0	0	1	0	1	8.77	0.832383	0	0	0	0	0	0	0
Leah Bouterse	10/31/2016	12:00:00	0	7.3m	0	2	0	1	1	0	2	1		0	0	0	1	0	0	0	0	0	0	1	0	1	6.03	1.21061	0	0	0	0	0	0	0
Leah Bouterse	10/31/2016	12:00:00	0	7.3m	0	2	0	1	1	2	2	1		0	0	0	1	0	0	0	0	0	0	1	0	1	6.47	1.12828	0	0	0	0	0	0	0
Leah Bouterse	10/31/2016	12:00:00	0	7.3m	0	2	0	1	1	2	2	1		0	0	0	1	0	0	0	0	0	0	1	0	1	6.43	1.1353	0	0	0	0	0	0	0
Leah Bouterse	10/31/2016	12:00:00	0	7.3m	0	2	0	1	1	2	2	1		0	0	0	1	0	0	0	0	0	0	1	0	1	7.62	0.958005	0	0	0	0	0	0	0
Leah Bouterse	10/31/2016	12:00:00	0	7.3m	0	2	0	1	1	1	2	2		0	0	0	1	0	0	0	0	0	0	1	0	1	5.73	1.274	0	0	0	0	0	0	0
Leah Bouterse	10/31/2016	12:00:00	0	7.3m	0	4	0	2	1	1	2	2		0	0	0	0	0	0	1	0	0	0	0	1	1	5.97	1.22278	0	0	0	0	0	0	0
Leah Bouterse	10/31/2016	12:00:00	0	7.3m	0	2	0	1	1	2	2	2		0	0	0	1	0	0	0	0	0	0	1	0	1	9.91	0.73663	0	0	0	0	0	0	0
Leah Bouterse	10/31/2016	12:00:00	0	7.3m	0	2	0	1	1	3	2	2		0	0	0	1	0	0	0	0	0	0	1	0	1	8.77	0.832383	0	0	0	0	0	0	0
Leah Bouterse	10/31/2016	12:00:00	0	7.3m	0	2	0	1	1	3	2	2		0	0	0	1	0	0	0	0	0	0	1	0	1	7.22	1.01108	0	0	0	0	0	0	0
Leah Bouterse	10/31/2016	12:00:00	0	7.3m	0	5	1	2	1	0	2	1		0	0	0	0	0	0	1	0	0	0	0	1	1	12.39	0.589185	0	0	0	0	0	0	0
Leah Bouterse	10/31/2016	12:00:00	0	7.3m	0	3	1	1	1	2	2	1		0	0	0	0	1	0	0	0	0	0	0	1	1	7.93	0.920555	0	0	0	0	0	0	0
Leah Bouterse	10/31/2016	12:00:00	0	7.3m	0	3	1	1	1	2	2	1		0	0	0	0	1	0	0	0	0	0	0	1	1	8.5	0.858824	0	0	0	0	0	0	0
Leah Bouterse	10/31/2016	12:00:00	0	7.3m	0	3	1	1	1	2	2	1		0	0	0	0	1	0	0	0	0	0	0	1	1	7.63	0.95675	0	0	0	0	0	0	0
Leah Bouterse	10/31/2016	12:00:00	0	7.3m	0	3	1	1	1	2	2	1		0	0	0	0	1	0	0	0	0	0	0	1	1	9.13	0.799562	0	0	0	0	0	0	0
Leah Bouterse	10/31/2016	12:00:00	0	7.3m	0	3	1	1	1	2	2	1		0	0	0	0	1	0	0	0	0	0	0	1	1	6.77	1.07829	0	0	0	0	0	0	0
Leah Bouterse	10/31/2016	12:00:00	0	7.3m	0	3	1	1	1	2	2	1		0	0	0	0	1	0	0	0	0	0	0	1	1	8.95	0.815642	0	0	0	0	0	0	0
Leah Bouterse	10/31/2016	12:00:00	0	7.3m	0	3	1	1	1	2	2	1		0	0	0	0	1	0	0	0	0	0	0	1	1	8.82	0.827664	0	0	0	0	0	0	0
Leah Bouterse	10/31/2016	12:00:00	0	7.3m	0	3	1	1	1	2	2	1		0	0	0	0	1	0	0	0	0	0	0	1	1	7.4	0.986486	0	0	0	0	0	0	0
Leah Bouterse	10/31/2016	12:00:00	0	7.3m	0	3	1	1	1	2	2	1		0	0	0	0	1	0	0	0	0	0	0	1	1	8.43	0.865955	0	0	0	0	0	0	0
Leah Bouterse	10/31/2016	12:00:00	0	7.3m	0	1	1	0	1	3	2	1		0	0	1	0	0	0	0	0	0	0	0	1	1	14.94	0.488621	0	0	0	0	0	0	0
Leah Bouterse	10/31/2016	12:00:00	0	7.3m	0	3	1	1	1	3	2	1		0	0	0	0	1	0	0	0	0	0	0	1	1	8.89	0.821147	0	0	0	0	0	0	0
Leah Bouterse	10/31/2016	12:00:00	0	7.3m	0	1	1	0	1	2	2	2		0	0	1	0	0	0	0	0	0	0	0	1	1	12.34	0.591572	0	0	0	0	0	0	0
Leah Bouterse	10/31/2016	12:00:00	0	7.3m	0	3	1	1	1	2	2	2		0	0	0	0	1	0	0	0	0	0	0	1	1	8.19	0.891331	0	0	0	0	0	0	0
Leah Bouterse	10/31/2016	12:00:00	0	7.3m	0	3	1	1	1	2	2	2		0	0	0	0	1	0	0	0	0	0	0	1	1	7.91	0.922882	0	0	0	0	0	0	0
Leah Bouterse	10/31/2016	12:00:00	0	7.3m	0	3	1	1	1	2	2	2		0	0	0	0	1	0	0	0	0	0	0	1	1	9.08	0.803965	0	0	0	0	0	0	0
Leah Bouterse	10/31/2016	12:00:00	0	7.3m	0	3	1	1	1	2	2	2		0	0	0	0	1	0	0	0	0	0	0	1	1	8.75	0.834286	0	0	0	0	0	0	0
Leah Bouterse	10/31/2016	12:00:00	0	7.3m	0	3	1	1	1	2	2	2		0	0	0	0	1	0	0	0	0	0	0	1	1	7.77	0.939511	0	0	0	0	0	0	0
Leah Bouterse	10/31/2016	12:00:00	0	7.3m	0	3	1	1	1	3	2	2		0	0	0	0	1	0	0	0	0	0	0	1	1	9.08	0.803965	0	0	0	0	0	0	0
Leah Bouterse	10/31/2016	12:00:00	0	7.3m	0	3	1	1	1	3	2	2		0	0	0	0	1	0	0	0	0	0	0	1	1	7.33	0.995907	0	0	0	0	0	0	0
Leah Bouterse	10/31/2016	12:00:00	0	7.3m	0	3	1	1	1	3	2	2		0	0	0	0	1	0	0	0	0	0	0	1	1	9.05	0.80663	0	0	0	0	0	0	0
Leah Bouterse	10/31/2016	12:00:00	0	7.3m	0	3	1	1	1	3	2	2		0	0	0	0	1	0	0	0	0	0	0	1	1	9.6	0.760417	0	0	0	0	0	0	0
Leah Bouterse	10/31/2016	12:00:00	0	7.3m	0	3	1	1	1	3	2	2		0	0	0	0	1	0	0	0	0	0	0	1	1	7.12	1.02528	0	0	0	0	0	0	0
Leah Bouterse	10/31/2016	12:00:00	0	7.3m	0	3	1	1	1	3	2	2		0	0	0	0	1	0	0	0	0	0	0	1	1	16.02	0.45568	0	0	0	0	0	0	0
Leah Bouterse	10/31/2016	12:00:00	0	7.3m	0	3	1	1	1	3	2	2		0	0	0	0	1	0	0	0	0	0	0	1	1	9.32	0.783262	0	0	0	0	0	0	0
Leah Bouterse	10/31/2016	12:00:00	0	7.3m	0	3	1	1	1	3	2	2		0	0	0	0	1	0	0	0	0	0	0	1	1	11.1	0.657658	0	0	0	0	0	0	0
Leah Bouterse	10/31/2016	12:00:00	0	7.3m	0	3	1	1	1	3	2	3		0	0	0	0	1	0	0	0	0	0	0	1	1	10.82	0.674677	0	0	0	0	0	0	0
Leah Bouterse	10/31/2016	12:00:00	0	7.3m	0	6	0	3	1	2	2	2		0	0	0	0	0	0	0	1	0	0	1	0	1	7.6	0.960526	0	0	0	1	7	2	0
Leah Bouterse	10/31/2016	12:00:00	0	7.3m	0	2	0	1	1	2	1	2		1	0	0	3	0	0	0	0	0	0	3	0	3	8.9	0.820225	1	0	0	0	1	0	1
Leah Bouterse	10/31/2016	12:00:00	0	7.3m	0	2	0	1	1	3	2	1		1	0	0	2	0	0	0	0	0	0	2	0	2	7.89	0.925222	1	0	0	0	1	0	1
Leah Bouterse	10/31/2016	12:00:00	0	7.3m	0	2	0	1	1	1	2	2		1	0	0	2	0	0	0	0	0	0	2	0	2	5.93	1.23103	1	0	0	0	1	0	1
Leah Bouterse	10/31/2016	12:00:00	0	7.3m	0	2	0	1	1	2	2	2		1	0	0	2	0	0	0	0	0	0	2	0	2	9.43	0.774125	1	0	0	0	1	0	1
Leah Bouterse	10/31/2016	12:00:00	0	7.3m	0	2	0	1	1	2	2	3		1	0	0	2	0	0	0	0	0	0	2	0	2	7.03	1.03841	1	0	0	0	1	0	1
Leah Bouterse	10/31/2016	12:00:00	0	7.3m	0	2	0	1	1	3	2	3		1	0	0	2	0	0	0	0	0	0	2	0	2	9.95	0.733668	1	0	0	0	1	0	1
Leah Bouterse	10/31/2016	12:00:00	0	7.3m	0	3	1	1	1	2	2	1		1	0	0	1	1	0	0	0	0	0	1	1	2	9.25	0.789189	1	0	0	0	1	0	6
Leah Bouterse	10/31/2016	12:00:00	0	7.3m	0	3	1	1	1	3	2	2		1	0	0	1	1	0	0	0	0	0	1	1	2	9.08	0.803965	1	0	0	0	1	0	6
Leah Bouterse	10/31/2016	12:00:00	0	7.3m	0	3	1	1	1	3	2	2		1	0	0	1	1	0	0	0	0	0	1	1	2	8.77	0.832383	1	0	0	0	1	0	6
Leah Bouterse	10/31/2016	12:00:00	0	7.3m	0	3	1	1	1	3	2	2		1	0	0	1	1	0	0	0	0	0	1	1	2	7.93	0.920555	1	0	0	0	1	0	6
Leah Bouterse	10/31/2016	12:00:00	0	7.3m	0	3	1	1	1	3	2	2		1	0	0	1	1	0	0	0	0	0	1	1	2	7.3	1	1	0	0	0	1	0	6
Leah Bouterse	10/31/2016	12:00:00	0	7.3m	0	3	1	1	1	2	2	1		1	0	0	2	1	0	0	0	0	0	2	1	3	9.35	0.780749	1	0	0	0	1	0	6
Leah Bouterse	10/31/2016	12:00:00	0	7.3m	0	2	0	1	1	2	1	1		1	0	0	1	1	0	0	0	0	0	1	1	2	8.25	0.884848	0	1	0	0	2	0	6
Leah Bouterse	10/31/2016	12:00:00	0	7.3m	0	3	1	1	1	2	1	1		1	0	0	0	2	0	0	0	0	0	0	2	2	9.12	0.800439	0	1	0	0	2	0	2
Leah Bouterse	10/31/2016	12:00:00	0	7.3m	0	3	1	1	1	2	1	2		1	0	0	0	2	0	0	0	0	0	0	2	2	8.95	0.815642	0	1	0	0	2	0	2
Leah Bouterse	10/31/2016	12:00:00	0	7.3m	0	2	0	1	1	2	2	1		1	0	0	1	1	0	0	0	0	0	1	1	2	9.1	0.802198	0	1	0	0	2	0	6
Leah Bouterse	10/31/2016	12:00:00	0	7.3m	0	3	1	1	1	2	2	1		1	0	0	0	2	0	0	0	0	0	0	2	2	8.22	0.888078	0	1	0	0	2	0	2
Leah Bouterse	10/31/2016	12:00:00	0	7.3m	0	3	1	1	1	2	2	1		1	0	0	0	2	0	0	0	0	0	0	2	2	9.02	0.809313	0	1	0	0	2	0	2
Leah Bouterse	10/31/2016	12:00:00	0	7.3m	0	3	1	1	1	3	2	1		1	0	0	0	2	0	0	0	0	0	0	2	2	11	0.663636	0	1	0	0	2	0	2
Leah Bouterse	10/31/2016	12:00:00	0	7.3m	0	3	1	1	1	3	2	1		1	0	0	0	2	0	0	0	0	0	0	2	2	9.23	0.790899	0	1	0	0	2	0	2
Leah Bouterse	10/31/2016	12:00:00	0	7.3m	0	3	1	1	1	0	0	2	0	1	0	0	0	1	0	0	1	0	0	1	1	2	10.91	0.669111	1	0	0	1	3	3	4
Leah Bouterse	10/31/2016	12:00:00	0	7.3m	0	3	1	1	1	0	0	2	0	1	0	0	1	1	0	0	0	0	0	1	1	2	11.41	0.63979	1	0	0	1	3	1	5
Leah Bouterse	10/31/2016	12:00:00	0	7.3m	0	3	1	1	1	0	2	1		1	0	0	0	1	0	0	1	0	0	1	1	2	11.65	0.626609	1	0	0	1	3	2	4
Leah Bouterse	10/31/2016	12:00:00	0	7.3m	0	2	0	1	0			0		1	0	0	1	1	0	0	0	1	0	1	2	3	9.22	0.791757	0	1	0	1	4	2	5
Leah Bouterse	10/31/2016	12:00:00	0	7.3m	0	2	0	1	1	2	0	3	1	1	0	0	1	1	0	0	0	0	0	1	1	2	11.75	0.621277	0	1	0	1	4	1	5
Leah Bouterse	10/31/2016	12:00:00	0	7.3m	0	3	1	1	1	2	0	2	0	1	0	0	0	2	0	0	0	0	0	0	2	2	10.42	0.700576	0	1	0	1	4	1	4
Leah Bouterse	10/31/2016	12:00:00	0	7.3m	0	3	1	1	1	1	0	3	1	1	0	0	0	2	0	0	0	0	0	0	2	2	9.47	0.770855	0	1	0	1	4	1	4
Leah Bouterse	10/31/2016	12:00:00	0	7.3m	0	3	1	1	1	0	0	2	0	1	0	0	0	3	0	0	0	0	0	0	3	3	9.42	0.774947	0	1	0	1	4	1	4
Leah Bouterse	10/31/2016	12:00:00	0	7.3m	0	3	1	1	1	0	0	2	0	1	0	0	0	3	0	0	0	0	0	0	3	3	11.9	0.613445	0	1	0	1	4	1	4
3	10/31/2016	12:00:00	0	7.3m	0	2	0	1	1	2	1	2		1	0	0	1	0	0	0	0	1	0	1	1	2	7.45	0.979866	0	1	0	1	4	2	3
Leah Bouterse	10/31/2016	12:00:00	0	7.3m	0	3	1	1	1	1	2	2		1	0	0	0	1	0	0	0	1	0	0	2	2	15.27	0.478062	0	1	0	1	4	2	4
Leah Bouterse	10/31/2016	12:00:00	0	7.3m	0	2	0	1	1	2	1	2		1	0	0	1	0	0	0	1	1	0	2	1	3	9.12	0.800439	0	0	1	1	5	2	3
Leah Bouterse	10/31/2016	12:00:00	0	7.3m	0	2	0	1	1	0	2	1		1	0	0	1	0	0	0	1	1	0	2	1	3	9.62	0.758836	0	0	1	1	5	2	3
Leah Bouterse	11/22/2016	17:00:00	0	7.3m	1	0	0	0	0			0		0	1	0	0	0	0	0	0	0	0	1	0	1	8.48	0.860849	0	0	0	0	0	0	0
Leah Bouterse	11/22/2016	17:00:00	0	7.3m	1	2	0	1	0			0		0	0	0	1	0	0	0	0	0	0	1	0	1	5.53	1.32007	0	0	0	0	0	0	0
Leah Bouterse	11/22/2016	17:00:00	0	7.3m	1	2	0	1	0			0		0	0	0	1	0	0	0	0	0	0	1	0	1	8.73	0.836197	0	0	0	0	0	0	0
Leah Bouterse	11/22/2016	17:00:00	0	7.3m	1	2	0	1	0			0		0	0	0	1	0	0	0	0	0	0	1	0	1	7	1.04286	0	0	0	0	0	0	0
Leah Bouterse	11/22/2016	17:00:00	0	7.3m	1	2	0	1	0			0		0	0	0	1	0	0	0	0	0	0	1	0	1	7.25	1.0069	0	0	0	0	0	0	0
Leah Bouterse	11/22/2016	17:00:00	0	7.3m	1	2	0	1	0			0		0	0	0	1	0	0	0	0	0	0	1	0	1	6.57	1.11111	0	0	0	0	0	0	0
Leah Bouterse	11/22/2016	17:00:00	0	7.3m	1	2	0	1	0			0		0	0	0	1	0	0	0	0	0	0	1	0	1	5.77	1.26516	0	0	0	0	0	0	0
Leah Bouterse	11/22/2016	17:00:00	0	7.3m	1	2	0	1	0			0		0	0	0	1	0	0	0	0	0	0	1	0	1	7.28	1.00275	0	0	0	0	0	0	0
Leah Bouterse	11/22/2016	17:00:00	0	7.3m	1	3	1	1	0			0		0	0	0	0	1	0	0	0	0	0	0	1	1	9.92	0.735887	0	0	0	0	0	0	0
Leah Bouterse	11/22/2016	17:00:00	0	7.3m	1	3	1	1	0			0		0	0	0	0	1	0	0	0	0	0	0	1	1	6.37	1.146	0	0	0	0	0	0	0
Leah Bouterse	11/22/2016	17:00:00	0	7.3m	1	3	1	1	1	0	0	2	0	0	0	0	0	1	0	0	0	0	0	0	1	1	8.6	0.848837	0	0	0	1	0	1	0
Leah Bouterse	11/22/2016	17:00:00	0	7.3m	1	3	1	1	1	0	0	2	0	0	0	0	0	1	0	0	0	0	0	0	1	1	11.12	0.656475	0	0	0	1	0	1	0
Leah Bouterse	11/22/2016	17:00:00	0	7.3m	1	3	1	1	1	0	0	2	0	0	0	0	0	1	0	0	0	0	0	0	1	1	10.91	0.669111	0	0	0	1	0	1	0
Leah Bouterse	11/22/2016	17:00:00	0	7.3m	1	3	1	1	1	1	0	2	0	0	0	0	0	1	0	0	0	0	0	0	1	1	10.63	0.686736	0	0	0	1	0	1	0
Leah Bouterse	11/22/2016	17:00:00	0	7.3m	1	3	1	1	1	2	0	2	0	0	0	0	0	1	0	0	0	0	0	0	1	1	10.22	0.714286	0	0	0	1	0	1	0
Leah Bouterse	11/22/2016	17:00:00	0	7.3m	1	3	1	1	1	2	0	3	1	0	0	0	0	1	0	0	0	0	0	0	1	1	9.4	0.776596	0	0	0	1	0	1	0
Leah Bouterse	11/22/2016	17:00:00	0	7.3m	1	2	0	1	1	2	1	1		0	0	0	1	0	0	0	0	0	0	1	0	1	11.8	0.618644	0	0	0	0	0	0	0
Leah Bouterse	11/22/2016	17:00:00	0	7.3m	1	2	0	1	1	2	1	1		0	0	0	1	0	0	0	0	0	0	1	0	1	7.05	1.03546	0	0	0	0	0	0	0
Leah Bouterse	11/22/2016	17:00:00	0	7.3m	1	2	0	1	1	2	1	2		0	0	0	1	0	0	0	0	0	0	1	0	1	8.5	0.858824	0	0	0	0	0	0	0
Leah Bouterse	11/22/2016	17:00:00	0	7.3m	1	2	0	1	1	2	1	2		0	0	0	1	0	0	0	0	0	0	1	0	1	5.93	1.23103	0	0	0	0	0	0	0
Leah Bouterse	11/22/2016	17:00:00	0	7.3m	1	3	1	1	1	2	1	1		0	0	0	0	1	0	0	0	0	0	0	1	1	8.3	0.879518	0	0	0	0	0	0	0
Leah Bouterse	11/22/2016	17:00:00	0	7.3m	1	3	1	1	1	2	1	1		0	0	0	0	1	0	0	0	0	0	0	1	1	10.22	0.714286	0	0	0	0	0	0	0
Leah Bouterse	11/22/2016	17:00:00	0	7.3m	1	3	1	1	1	2	1	2		0	0	0	0	1	0	0	0	0	0	0	1	1	7.3	1	0	0	0	0	0	0	0
Leah Bouterse	11/22/2016	17:00:00	0	7.3m	1	2	0	1	1	0	2	1		0	0	0	1	0	0	0	0	0	0	1	0	1	7.2	1.01389	0	0	0	0	0	0	0
Leah Bouterse	11/22/2016	17:00:00	0	7.3m	1	2	0	1	1	0	2	1		0	0	0	1	0	0	0	0	0	0	1	0	1	8.55	0.853801	0	0	0	0	0	0	0
Leah Bouterse	11/22/2016	17:00:00	0	7.3m	1	2	0	1	1	2	2	1		0	0	0	1	0	0	0	0	0	0	1	0	1	5.45	1.33945	0	0	0	0	0	0	0
Leah Bouterse	11/22/2016	17:00:00	0	7.3m	1	2	0	1	1	2	2	1		0	0	0	1	0	0	0	0	0	0	1	0	1	6.5	1.12308	0	0	0	0	0	0	0
Leah Bouterse	11/22/2016	17:00:00	0	7.3m	1	2	0	1	1	3	2	1		0	0	0	1	0	0	0	0	0	0	1	0	1	7.62	0.958005	0	0	0	0	0	0	0
Leah Bouterse	11/22/2016	17:00:00	0	7.3m	1	2	0	1	1	1	2	2		0	0	0	1	0	0	0	0	0	0	1	0	1	6.4	1.14062	0	0	0	0	0	0	0
Leah Bouterse	11/22/2016	17:00:00	0	7.3m	1	2	0	1	1	1	2	2		0	0	0	1	0	0	0	0	0	0	1	0	1	8.3	0.879518	0	0	0	0	0	0	0
Leah Bouterse	11/22/2016	17:00:00	0	7.3m	1	2	0	1	1	2	2	2		0	0	0	1	0	0	0	0	0	0	1	0	1	7.27	1.00413	0	0	0	1	0	0	0
Leah Bouterse	11/22/2016	17:00:00	0	7.3m	1	2	0	1	1	2	2	2		0	0	0	1	0	0	0	0	0	0	1	0	1	7.92	0.921717	0	0	0	0	0	0	0
Leah Bouterse	11/22/2016	17:00:00	0	7.3m	1	2	0	1	1	3	2	2		0	0	0	1	0	0	0	0	0	0	1	0	1	8.18	0.892421	0	0	0	0	0	0	0
Leah Bouterse	11/22/2016	17:00:00	0	7.3m	1	2	0	1	1	2	2	3		0	0	0	1	0	0	0	0	0	0	1	0	1	6.55	1.1145	0	0	0	0	0	0	0
Leah Bouterse	11/22/2016	17:00:00	0	7.3m	1	2	0	1	1	2	2	3		0	0	0	1	0	0	0	0	0	0	1	0	1	8.3	0.879518	0	0	0	0	0	0	0
Leah Bouterse	11/22/2016	17:00:00	0	7.3m	1	2	0	1	1	2	2	3		0	0	0	1	0	0	0	0	0	0	1	0	1	5.82	1.2543	0	0	0	0	0	0	0
Leah Bouterse	11/22/2016	17:00:00	0	7.3m	1	3	1	1	1	0	2	1		0	0	0	0	1	0	0	0	0	0	0	1	1	7.19	1.0153	0	0	0	0	0	0	0
Leah Bouterse	11/22/2016	17:00:00	0	7.3m	1	3	1	1	1	0	2	1		0	0	0	0	1	0	0	0	0	0	0	1	1	10.89	0.67034	0	0	0	0	0	0	0
Leah Bouterse	11/22/2016	17:00:00	0	7.3m	1	3	1	1	1	2	2	1		0	0	0	0	1	0	0	0	0	0	0	1	1	8.73	0.836197	0	0	0	0	0	0	0
Leah Bouterse	11/22/2016	17:00:00	0	7.3m	1	3	1	1	1	2	2	1		0	0	0	0	1	0	0	0	0	0	0	1	1	13.09	0.557678	0	0	0	0	0	0	0
Leah Bouterse	11/22/2016	17:00:00	0	7.3m	1	3	1	1	1	2	2	1		0	0	0	0	1	0	0	0	0	0	0	1	1	7.27	1.00413	0	0	0	0	0	0	0
Leah Bouterse	11/22/2016	17:00:00	0	7.3m	1	3	1	1	1	2	2	1		0	0	0	0	1	0	0	0	0	0	0	1	1	9.91	0.73663	0	0	0	0	0	0	0
Leah Bouterse	11/22/2016	17:00:00	0	7.3m	1	3	1	1	1	3	2	1		0	0	0	0	1	0	0	0	0	0	0	1	1	8.18	0.892421	0	0	0	0	0	0	0
Leah Bouterse	11/22/2016	17:00:00	0	7.3m	1	3	1	1	1	3	2	1		0	0	0	0	1	0	0	0	0	0	0	1	1	7.28	1.00275	0	0	0	0	0	0	0
Leah Bouterse	11/22/2016	17:00:00	0	7.3m	1	3	1	1	1	3	2	1		0	0	0	0	1	0	0	0	0	0	0	1	1	12.15	0.600823	0	0	0	0	0	0	0
Leah Bouterse	11/22/2016	17:00:00	0	7.3m	1	6	1	1	1	1	2	2		0	0	0	0	0	0	0	0	1	0	0	1	1	6.03	1.21061	0	0	0	1	0	2	0
Leah Bouterse	11/22/2016	17:00:00	0	7.3m	1	3	1	1	1	2	2	2		0	0	0	0	1	0	0	0	0	0	0	1	1	8.28	0.881643	0	0	0	0	0	0	0
Leah Bouterse	11/22/2016	17:00:00	0	7.3m	1	3	1	1	1	2	2	2		0	0	0	0	1	0	0	0	0	0	0	1	1	6.58	1.10942	0	0	0	0	0	0	0
Leah Bouterse	11/22/2016	17:00:00	0	7.3m	1	3	1	1	1	3	2	2		0	0	0	0	1	0	0	0	0	0	0	1	1	9.44	0.773305	0	0	0	0	0	0	0
Leah Bouterse	11/22/2016	17:00:00	0	7.3m	1	3	1	1	1	0	2	3		0	0	0	0	1	0	0	0	0	0	0	1	1	5.97	1.22278	0	0	0	0	0	0	0
Leah Bouterse	11/22/2016	17:00:00	0	7.3m	1	7	0	3	1	2	2	2		0	0	0	0	0	0	0	1	0	0	1	0	1	12.5	0.584	0	0	0	1	7	2	0
Leah Bouterse	11/22/2016	17:00:00	0	7.3m	1	6	1	3	1	1	2	2		0	0	0	0	0	0	0	0	1	0	0	1	1	6.43	1.1353	0	0	0	1	7	2	0
Leah Bouterse	11/22/2016	17:00:00	0	7.3m	1	6	1	3	1	1	2	2		0	0	0	0	0	0	0	0	1	0	0	1	1	7.76	0.940722	0	0	0	1	7	2	0
Leah Bouterse	11/22/2016	17:00:00	0	7.3m	1	6	1	3	1	2	2	2		0	0	0	0	0	0	0	0	1	0	0	1	1	10.52	0.693916	0	0	0	1	7	2	0
Leah Bouterse	11/22/2016	17:00:00	0	7.3m	1	6	1	3	1	1	2	3		0	0	0	0	0	0	0	0	1	0	0	1	1	7.6	0.960526	0	0	0	1	7	2	0
Leah Bouterse	11/22/2016	17:00:00	0	7.3m	1	2	0	1	1	1	1	2		1	0	0	2	0	0	0	0	0	0	2	0	2	6.37	1.146	1	0	0	0	1	0	1
Leah Bouterse	11/22/2016	17:00:00	0	7.3m	1	2	0	1	1	1	2	2		1	0	0	2	0	0	0	0	0	0	2	0	2	9.6	0.760417	1	0	0	0	1	0	1
Leah Bouterse	11/22/2016	17:00:00	0	7.3m	1	2	0	1	1	1	2	2		1	0	0	2	0	0	0	0	0	0	2	0	2	9.22	0.791757	1	0	0	0	1	0	1
Leah Bouterse	11/22/2016	17:00:00	0	7.3m	1	2	0	1	1	1	2	2		1	0	0	2	0	0	0	0	0	0	2	0	2	7.33	0.995907	1	0	0	0	1	0	1
Leah Bouterse	11/22/2016	17:00:00	0	7.3m	1	4	0	2	1	1	2	2		1	0	0	0	0	2	0	0	0	0	2	0	2	5.52	1.32246	1	0	0	0	1	0	1
Leah Bouterse	11/22/2016	17:00:00	0	7.3m	1	2	0	1	1	2	2	2		1	0	0	2	0	0	0	0	0	0	2	0	2	5.09	1.43418	1	0	0	0	1	0	1
Leah Bouterse	11/22/2016	17:00:00	0	7.3m	1	2	0	1	1	2	2	2		1	0	0	3	0	0	0	0	0	0	3	0	3	8.22	0.888078	1	0	0	0	1	0	1
Leah Bouterse	11/22/2016	17:00:00	0	7.3m	1	3	1	1	1	2	2	1		1	0	0	1	1	0	0	0	0	0	1	1	2	11.87	0.614996	1	0	0	0	1	0	6
Leah Bouterse	11/22/2016	17:00:00	0	7.3m	1	3	1	1	1	2	2	2		1	0	0	1	1	0	0	0	0	0	1	1	2	7.55	0.966887	1	0	0	0	1	0	6
Leah Bouterse	11/22/2016	17:00:00	0	7.3m	1	3	1	1	1	2	2	2		1	0	0	1	1	0	0	0	0	0	1	1	2	9.25	0.789189	1	0	0	0	1	0	6
Leah Bouterse	11/22/2016	17:00:00	0	7.3m	1	3	1	1	1	3	2	2		1	0	0	1	1	0	0	0	0	0	1	1	2	10.1	0.722772	1	0	0	0	1	0	6
Leah Bouterse	11/22/2016	17:00:00	0	7.3m	1	3	1	1	1	2	1	1		1	0	0	0	2	0	0	0	0	0	0	2	2	8.35	0.874251	0	1	0	0	2	0	2
Leah Bouterse	11/22/2016	17:00:00	0	7.3m	1	3	1	1	1	2	2	1		1	0	0	0	2	0	0	0	0	0	0	2	2	8.9	0.820225	0	1	0	0	2	0	2
Leah Bouterse	11/22/2016	17:00:00	0	7.3m	1	3	1	1	1	2	2	1		1	0	0	0	2	0	0	0	0	0	0	2	2	8.52	0.856808	0	1	0	0	2	0	2
Leah Bouterse	11/22/2016	17:00:00	0	7.3m	1	3	1	1	1	1	2	2		1	0	0	0	2	0	0	0	0	0	0	2	2	7.85	0.929936	0	1	0	0	2	0	2
Leah Bouterse	11/22/2016	17:00:00	0	7.3m	1	3	1	1	1	3	2	2		1	0	0	0	2	0	0	0	0	0	0	2	2	8.77	0.832383	0	1	0	0	2	0	2
Leah Bouterse	11/22/2016	17:00:00	0	7.3m	1	3	1	1	1	3	2	2		1	0	0	0	2	0	0	0	0	0	0	2	2	10.83	0.674054	0	1	0	0	2	0	2
Leah Bouterse	11/22/2016	17:00:00	0	7.3m	1	3	1	1	1	3	2	2		1	0	0	0	2	0	0	0	0	0	0	2	2	9.07	0.804851	0	1	0	0	2	0	2
Leah Bouterse	11/22/2016	17:00:00	0	7.3m	1	3	1	1	1	3	2	2		1	0	0	0	2	0	0	0	0	0	0	2	2	8.72	0.837156	0	1	0	0	2	0	2
Leah Bouterse	11/22/2016	17:00:00	0	7.3m	1	3	1	1	1	2	1	1		1	0	0	0	1	0	0	0	1	0	0	2	2	8.28	0.881643	0	1	0	1	4	2	4
Leah Bouterse	11/22/2016	17:00:00	0	7.3m	1	3	1	1	1	0	2	2		1	0	0	0	1	0	0	0	1	0	0	2	2	9.33	0.782422	0	1	0	1	4	2	4
Leah Bouterse	11/22/2016	17:00:00	0	7.3m	1	3	1	1	1	2	0	3	1	1	0	0	0	3	0	0	1	0	0	1	3	4	10.28	0.710117	0	0	1	1	5	3	4
Leah Bouterse	11/22/2016	17:00:00	0	7.3m	1	6	1	3	1	1	2	2		1	0	0	0	0	0	0	0	2	0	0	2	2	8.91	0.819304	0	1	0	1	7	2	7
Leah Bouterse	11/29/2016	17:30:00	0	7.3m	0	2	0	1	0			0		0	0	0	0	0	0	0	0	0	0	1	0	1	8.13	0.897909	0	0	0	0	0	0	0
Leah Bouterse	11/29/2016	17:30:00	0	7.3m	0	2	0	1	0			0		0	0	0	1	0	0	0	0	0	0	1	0	1	6.27	1.16427	0	0	0	0	0	0	0
Leah Bouterse	11/29/2016	17:30:00	0	7.3m	0	2	0	1	0			0		0	0	0	1	0	0	0	0	0	0	1	0	1	6.15	1.18699	0	0	0	0	0	0	0
Leah Bouterse	11/29/2016	17:30:00	0	7.3m	0	2	0	1	0			0		0	0	0	1	0	0	0	0	0	0	1	0	1	7.78	0.938303	0	0	0	0	0	0	0
Leah Bouterse	11/29/2016	17:30:00	0	7.3m	0	2	0	1	0			0		0	0	0	1	0	0	0	0	0	0	1	0	1	4.6	1.58696	0	0	0	0	0	0	0
Leah Bouterse	11/29/2016	17:30:00	0	7.3m	0	2	0	1	0			0		0	0	0	1	0	0	0	0	0	0	1	0	1	7.3	1	0	0	0	0	0	0	0
Leah Bouterse	11/29/2016	17:30:00	0	7.3m	0	2	0	1	0			0		0	0	0	1	0	0	0	0	0	0	1	0	1	8.42	0.866983	0	0	0	0	0	0	0
Leah Bouterse	11/29/2016	17:30:00	0	7.3m	0	2	0	1	0			0		0	0	0	1	0	0	0	0	0	0	1	0	1	9.47	0.770855	0	0	0	0	0	0	0
Leah Bouterse	11/29/2016	17:30:00	0	7.3m	0	2	0	1	0			0		0	0	0	1	0	0	0	0	0	0	1	0	1	6.93	1.05339	0	0	0	0	0	0	0
Leah Bouterse	11/29/2016	17:30:00	0	7.3m	0	3	1	1	1	0	0	2	0	0	0	0	0	1	0	0	0	0	0	0	1	1	10.86	0.672192	0	0	0	1	0	1	0
Leah Bouterse	11/29/2016	17:30:00	0	7.3m	0	3	1	1	1	1	0	2	0	0	0	0	0	1	0	0	0	0	0	0	1	1	9.91	0.73663	0	0	0	1	0	1	0
Leah Bouterse	11/29/2016	17:30:00	0	7.3m	0	3	1	1	1	1	0	2	0	0	0	0	0	1	0	0	0	0	0	0	1	1	11.14	0.655296	0	0	0	1	0	1	0
Leah Bouterse	11/29/2016	17:30:00	0	7.3m	0	3	1	1	1	2	0	3	1	0	0	0	0	1	0	0	0	0	0	0	1	1	10.63	0.686736	0	0	0	1	0	1	0
Leah Bouterse	11/29/2016	17:30:00	0	7.3m	0	2	0	1	1	2	1	1		0	0	0	1	0	0	0	0	0	0	1	0	1	5.73	1.274	0	0	0	0	0	0	0
Leah Bouterse	11/29/2016	17:30:00	0	7.3m	0	2	0	1	1	0	1	2		0	0	0	1	0	0	0	0	0	0	1	0	1	8.05	0.906832	0	0	0	0	0	0	0
Leah Bouterse	11/29/2016	17:30:00	0	7.3m	0	3	1	1	1	0	1	1		0	0	0	0	1	0	0	0	0	0	0	1	1	7.02	1.03989	0	0	0	0	0	0	0
Leah Bouterse	11/29/2016	17:30:00	0	7.3m	0	3	1	1	1	0	1	2		0	0	0	0	1	0	0	0	0	0	0	1	1	6.48	1.12654	0	0	0	0	0	0	0
Leah Bouterse	11/29/2016	17:30:00	0	7.3m	0	3	1	1	1	2	1	2		0	0	0	0	1	0	0	0	0	0	0	1	1	9.5	0.768421	0	0	0	0	0	0	0
Leah Bouterse	11/29/2016	17:30:00	0	7.3m	0	3	1	1	1	2	1	2		0	0	0	0	1	0	0	0	0	0	0	1	1	11.69	0.624465	0	0	0	0	0	0	0
Leah Bouterse	11/29/2016	17:30:00	0	7.3m	0	3	1	1	1	2	1	2		0	0	0	0	1	0	0	0	0	0	0	1	1	8.16	0.894608	0	0	0	0	0	0	0
Leah Bouterse	11/29/2016	17:30:00	0	7.3m	0	2	0	1	1	3	2	1		0	0	0	1	0	0	0	0	0	0	1	0	1	7.58	0.963061	0	0	0	0	0	0	0
Leah Bouterse	11/29/2016	17:30:00	0	7.3m	0	2	0	1	1	0	2	2		0	0	0	0	1	0	0	0	0	0	0	1	1	8	0.9125	0	0	0	0	0	0	0
Leah Bouterse	11/29/2016	17:30:00	0	7.3m	0	2	0	1	1	1	2	2		0	0	0	1	0	0	0	0	0	0	1	0	1	4.78	1.5272	0	0	0	0	0	0	0
Leah Bouterse	11/29/2016	17:30:00	0	7.3m	0	2	0	1	1	1	2	2		0	0	0	1	0	0	0	0	0	0	1	0	1	6.43	1.1353	0	0	0	0	0	0	0
Leah Bouterse	11/29/2016	17:30:00	0	7.3m	0	2	0	1	1	2	2	2		0	0	0	1	0	0	0	0	0	0	1	0	1	8.43	0.865955	0	0	0	0	0	0	0
Leah Bouterse	11/29/2016	17:30:00	0	7.3m	0	2	0	1	1	3	2	2		0	0	0	1	0	0	0	0	0	0	1	0	1	7.68	0.950521	0	0	0	0	0	0	0
Leah Bouterse	11/29/2016	17:30:00	0	7.3m	0	2	0	1	1	3	2	2		0	0	0	1	0	0	0	0	0	0	1	0	1	10.35	0.705314	0	0	0	0	0	0	0
Leah Bouterse	11/29/2016	17:30:00	0	7.3m	0	2	0	1	1	0	2	3		0	0	0	1	0	0	0	0	0	0	1	0	1	6.37	1.146	0	0	0	0	0	0	0
Leah Bouterse	11/29/2016	17:30:00	0	7.3m	0	3	1	1	1	0	2	1		0	0	0	0	1	0	0	0	0	0	0	1	1	7.55	0.966887	0	0	0	0	0	0	0
Leah Bouterse	11/29/2016	17:30:00	0	7.3m	0	3	1	1	1	2	2	1		0	0	0	0	1	0	0	0	0	0	0	1	1	6.91	1.05644	0	0	0	0	0	0	0
Leah Bouterse	11/29/2016	17:30:00	0	7.3m	0	3	1	1	1	0	2	2		0	0	0	0	1	0	0	0	0	0	0	1	1	11.57	0.630942	0	0	0	0	0	0	0
Leah Bouterse	11/29/2016	17:30:00	0	7.3m	0	3	1	1	1	1	2	2		0	0	0	0	1	0	0	0	0	0	0	1	1	9.07	0.804851	0	0	0	0	0	0	0
Leah Bouterse	11/29/2016	17:30:00	0	7.3m	0	3	1	1	1	1	2	2		0	0	0	0	1	0	0	0	0	0	0	1	1	9.3	0.784946	0	0	0	0	0	0	0
Leah Bouterse	11/29/2016	17:30:00	0	7.3m	0	3	1	1	1	2	2	2		0	0	0	0	1	0	0	0	0	0	0	1	1	10.35	0.705314	0	0	0	0	0	0	0
Leah Bouterse	11/29/2016	17:30:00	0	7.3m	0	3	1	1	1	2	2	2		0	0	0	0	1	0	0	0	0	0	0	1	1	6.12	1.19281	0	0	0	0	0	0	0
Leah Bouterse	11/29/2016	17:30:00	0	7.3m	0	1	1	0	1	3	2	2		0	0	1	0	0	0	0	0	0	0	0	1	1	8.96	0.814732	0	0	0	0	0	0	0
Leah Bouterse	11/29/2016	17:30:00	0	7.3m	0	3	1	1	1	3	2	2		0	0	0	0	1	0	0	0	0	0	0	1	1	9.82	0.743381	0	0	0	0	0	0	0
Leah Bouterse	11/29/2016	17:30:00	0	7.3m	0	3	1	1	1	3	2	2		0	0	0	0	1	0	0	0	0	0	0	1	1	10.82	0.674677	0	0	0	0	0	0	0
Leah Bouterse	11/29/2016	17:30:00	0	7.3m	0	3	1	1	1	3	2	2		0	0	0	0	1	0	0	0	0	0	0	1	1	7.15	1.02098	0	0	0	0	0	0	0
Leah Bouterse	11/29/2016	17:30:00	0	7.3m	0	3	1	1	1	3	2	2		0	0	0	0	1	0	0	0	0	0	0	1	1	7.15	1.02098	0	0	0	0	0	0	0
Leah Bouterse	11/29/2016	17:30:00	0	7.3m	0	3	1	1	1	3	2	2		0	0	0	0	1	0	0	0	0	0	0	1	1	7.38	0.98916	0	0	0	0	0	0	0
Leah Bouterse	11/29/2016	17:30:00	0	7.3m	0	3	1	1	1	3	2	2		0	0	0	0	1	0	0	0	0	0	0	1	1	7.55	0.966887	0	0	0	0	0	0	0
Leah Bouterse	11/29/2016	17:30:00	0	7.3m	0	3	1	1	1	3	2	2		0	0	0	0	1	0	0	0	0	0	0	1	1	9.78	0.746421	0	0	0	0	0	0	0
Leah Bouterse	11/29/2016	17:30:00	0	7.3m	0	3	1	1	1	3	2	2		0	0	0	0	1	0	0	0	0	0	0	1	1	10.15	0.719212	0	0	0	0	0	0	0
Leah Bouterse	11/29/2016	17:30:00	0	7.3m	0	3	1	1	1	0	2	3		0	0	0	0	1	0	0	0	0	0	0	1	1	9.38	0.778252	0	0	0	0	0	0	0
Leah Bouterse	11/29/2016	17:30:00	0	7.3m	0	3	1	1	1	3	2	3		0	0	0	0	1	0	0	0	0	0	0	1	1	6.1	1.19672	0	0	0	0	0	0	0
Leah Bouterse	11/29/2016	17:30:00	0	7.3m	0	2	0	1	1	0	2	1		1	0	0	2	0	0	0	0	0	0	2	0	2	8.07	0.904585	1	0	0	0	1	0	1
Leah Bouterse	11/29/2016	17:30:00	0	7.3m	0	2	0	1	1	3	2	2		1	0	0	2	0	0	0	0	0	0	2	0	2	9.72	0.751029	1	0	0	0	1	0	1
Leah Bouterse	11/29/2016	17:30:00	0	7.3m	0	2	0	1	1	3	2	3		1	0	0	2	0	0	0	0	0	0	2	0	2	8.65	0.843931	1	0	0	0	1	0	1
Leah Bouterse	11/29/2016	17:30:00	0	7.3m	0	3	1	1	1	2	2	1		1	0	0	1	1	0	0	0	0	0	1	1	2	11.33	0.644307	1	0	0	0	1	0	6
Leah Bouterse	11/29/2016	17:30:00	0	7.3m	0	3	1	1	1	2	2	1		1	0	0	1	1	0	0	0	0	0	1	1	2	8.78	0.831435	1	0	0	0	1	0	6
Leah Bouterse	11/29/2016	17:30:00	0	7.3m	0	3	1	1	1	3	2	1		1	0	0	1	1	0	0	0	0	0	1	1	2	8.58	0.850816	1	0	0	0	1	0	6
Leah Bouterse	11/29/2016	17:30:00	0	7.3m	0	2	0	1	0			0		1	0	0	1	1	0	0	0	0	0	1	1	2	6.05	1.20661	0	1	0	0	2	0	6
Leah Bouterse	11/29/2016	17:30:00	0	7.3m	0	2	0	1	1	0	1	2		1	0	0	1	1	0	0	0	0	0	1	1	2	5.92	1.23311	0	1	0	0	2	0	6
Leah Bouterse	11/29/2016	17:30:00	0	7.3m	0	3	1	1	1	2	1	2		1	0	0	0	2	0	0	0	0	0	0	2	2	5.08	1.43701	0	1	0	0	2	0	2
Leah Bouterse	11/29/2016	17:30:00	0	7.3m	0	3	1	1	1	2	1	2		1	0	0	0	2	0	0	0	0	0	0	2	2	9.88	0.738866	0	1	0	0	2	0	2
Leah Bouterse	11/29/2016	17:30:00	0	7.3m	0	3	1	1	1	2	1	2		1	0	0	0	2	0	0	0	0	0	0	2	2	13.59	0.53716	0	1	0	0	2	0	2
Leah Bouterse	11/29/2016	17:30:00	0	7.3m	0	3	1	1	1	2	1	2		1	0	0	0	3	0	0	0	0	0	0	3	3	10.3	0.708738	0	1	0	0	2	0	2
Leah Bouterse	11/29/2016	17:30:00	0	7.3m	0	3	1	1	1	0	2	1		1	0	0	0	2	0	0	0	0	0	0	2	2	7.48	0.975936	0	1	0	0	2	0	2
Leah Bouterse	11/29/2016	17:30:00	0	7.3m	0	3	1	1	1	2	2	1		1	0	0	0	2	0	0	0	0	0	0	2	2	8.36	0.873206	0	1	0	0	2	0	2
Leah Bouterse	11/29/2016	17:30:00	0	7.3m	0	3	1	1	1	2	2	1		1	0	0	0	2	0	0	0	0	0	0	2	2	11.42	0.639229	0	1	0	0	2	0	2
Leah Bouterse	11/29/2016	17:30:00	0	7.3m	0	3	1	1	1	3	2	1		1	0	0	0	2	0	0	0	0	0	0	2	2	9.17	0.796074	0	1	0	0	2	0	2
Leah Bouterse	11/29/2016	17:30:00	0	7.3m	0	3	1	1	1	3	2	1		1	0	0	0	2	0	0	0	0	0	0	2	2	11.77	0.620221	0	1	0	0	2	0	2
Leah Bouterse	11/29/2016	17:30:00	0	7.3m	0	3	1	1	1	3	2	1		1	0	0	0	2	0	0	0	0	0	0	2	2	6.45	1.13178	0	1	0	0	2	0	2
Leah Bouterse	11/29/2016	17:30:00	0	7.3m	0	3	1	1	1	2	2	2		1	0	0	0	2	0	0	0	0	0	0	2	2	7.6	0.960526	0	1	0	0	2	0	2
Leah Bouterse	11/29/2016	17:30:00	0	7.3m	0	3	1	1	1	2	2	2		1	0	0	0	2	0	0	0	0	0	0	2	2	9.12	0.800439	0	1	0	0	2	0	2
Leah Bouterse	11/29/2016	17:30:00	0	7.3m	0	3	1	1	1	3	2	2		1	0	0	0	2	0	0	0	0	0	0	2	2	11.01	0.663034	0	1	0	0	2	0	2
Leah Bouterse	11/29/2016	17:30:00	0	7.3m	0	1	1	0	1	2	2	2		1	0	4	0	0	0	0	0	0	0	0	4	4	10.13	0.720632	0	1	0	0	2	0	2
Leah Bouterse	11/29/2016	17:30:00	0	7.3m	0	3	1	1	1	1	0	3	1	1	0	0	0	1	0	0	1	0	0	1	1	2	14.14	0.516266	1	0	0	1	3	3	4
Leah Bouterse	11/29/2016	17:30:00	0	7.3m	0	2	0	1	1	0	0	2	0	1	0	0	1	1	0	0	0	0	0	1	1	2	7.32	0.997268	0	1	0	1	4	1	5
Leah Bouterse	11/29/2016	17:30:00	0	7.3m	0	2	0	1	1	2	0	3	1	1	0	0	1	1	0	0	0	1	0	1	2	3	10.45	0.698565	0	1	0	1	4	3	5
Leah Bouterse	11/29/2016	17:30:00	0	7.3m	0	3	1	1	1	1	0	2	0	1	0	0	0	2	0	0	0	0	0	0	2	2	10.32	0.707364	0	1	0	1	4	1	4
Leah Bouterse	11/29/2016	17:30:00	0	7.3m	0	3	1	1	1	0	0	2	0	1	0	0	0	3	0	0	0	0	0	0	3	3	16.25	0.449231	0	1	0	1	4	1	4
Leah Bouterse	11/29/2016	17:30:00	0	7.3m	0	2	0	1	1	3	2	1		1	0	0	1	0	0	0	1	0	0	1	1	2	10.91	0.669111	0	1	0	1	4	2	3
Leah Bouterse	11/29/2016	17:30:00	0	7.3m	0	3	1	1	1	3	2	2		1	0	0	0	1	0	0	0	1	0	0	2	2	10.95	0.666667	0	1	0	1	4	2	4
Leah Bouterse	11/29/2016	17:30:00	0	7.3m	0	3	1	1	1	3	2	2		1	0	0	0	1	0	0	1	0	0	0	2	2	8.19	0.891331	0	1	0	1	4	2	4
Leah Bouterse	11/29/2016	17:30:00	0	7.3m	0	3	1	1	1	2	1	2		1	0	0	0	3	0	0	1	1	0	1	4	5	12.27	0.594947	0	0	1	1	5	2	4
Leah Bouterse	11/29/2016	17:30:00	0	7.3m	0	6	1	3	1	2	1	2		1	0	0	0	0	0	0	0	1	0	0	1	1	10.11	0.722057	0	0	0	1	7	2	7
Leah Bouterse	28-FEB-17		1	5.4m	0.0	2	0	1	0			0		0	0	0	1	0	0	0	0	0	0	1	0	1	4.4	0.814815	0	0	0	0	0	0	0
Leah Bouterse	28-FEB-17		1	5.4m	1.0	2	0	3	1	1	1	2		0	0	0	0	1	0	0	1	0	0	1	0	1	3.85	0.712963	0	0	0	1	0	2	0
Leah Bouterse	28-FEB-17		1	5.4m	1.0	2	0	1	1	2	1	2		0	0	0	1	0	0	0	0	0	0	1	0	1	6.03	1.11667	0	0	0	0	0	0	0
Leah Bouterse	28-FEB-17		1	5.4m	1.0	2	0	1	1	2	1	2		0	0	0	1	0	0	0	0	0	0	1	0	1	4.28	0.792593	0	0	0	0	0	0	0
Leah Bouterse	28-FEB-17		1	5.4m	1.0	2	0	1	1	0	1	2		0	0	0	0	1	0	0	0	0	0	1	0	1	4.26	0.788889	0	0	0	0	0	0	0
Leah Bouterse	28-FEB-17		1	5.4m	1.0	2	0	1	1	2	1	2		0	0	0	1	0	0	0	0	0	0	1	0	1	3.96	0.733333	0	0	0	0	0	0	0
Leah Bouterse	28-FEB-17		1	5.4m	1.0	3	1	1	1	2	1	2		0	0	0	0	1	0	0	0	0	0	0	1	1	4.97	0.92037	0	0	0	0	0	0	0
Leah Bouterse	28-FEB-17		1	5.4m	1.0	3	1	1	1	2	1	2		0	0	0	0	1	0	0	0	0	0	0	1	1	4.41	0.816667	0	0	0	0	0	0	0
Leah Bouterse	28-FEB-17		1	5.4m	1.0	3	1	1	1	2	1	2		0	0	0	0	1	0	0	0	0	0	0	1	1	3.91	0.724074	0	0	0	0	0	0	0
Leah Bouterse	28-FEB-17		1	5.4m	1.0	3	1	1	1	2	1	2		0	0	0	0	1	0	0	0	0	0	0	1	1	3.57	0.661111	0	0	0	0	0	0	0
Leah Bouterse	28-FEB-17		1	5.4m	1.0	2	0	3	1	1	2	2		0	0	0	0	0	0	0	1	0	0	1	0	1	5.91	1.09444	0	0	0	1	0	2	0
Leah Bouterse	28-FEB-17		1	5.4m	1.0	2	0	3	1	1	2	2		0	0	0	0	0	0	0	1	0	0	1	0	1	5.31	0.983333	0	0	0	1	0	2	0
Leah Bouterse	28-FEB-17		1	5.4m	1.0	2	0	3	1	0	2	2		0	0	0	0	0	0	0	1	0	0	1	0	1	4	0.740741	0	0	0	1	0	2	0
Leah Bouterse	28-FEB-17		1	5.4m	1.0	2	0	1	1	1	2	2		0	0	0	1	0	0	0	0	0	0	1	0	1	5.28	0.977778	0	0	0	0	0	0	0
Leah Bouterse	28-FEB-17		1	5.4m	1.0	2	0	1	1	1	2	2		0	0	0	1	0	0	0	0	0	0	1	0	1	5.28	0.977778	0	0	0	0	0	0	0
Leah Bouterse	28-FEB-17		1	5.4m	1.0	2	0	1	1	0	2	2		0	0	0	1	0	0	0	0	0	0	1	0	1	5.24	0.97037	0	0	0	0	0	0	0
Leah Bouterse	28-FEB-17		1	5.4m	1.0	2	0	1	1	1	2	2		0	0	0	1	0	0	0	0	0	0	1	0	1	5.15	0.953704	0	0	0	0	0	0	0
Leah Bouterse	28-FEB-17		1	5.4m	1.0	2	0	1	1	1	2	2		0	0	0	1	0	0	0	0	0	0	1	0	1	5.11	0.946296	0	0	0	0	0	0	0
Leah Bouterse	28-FEB-17		1	5.4m	1.0	2	0	1	1	1	2	2		0	0	0	1	0	0	0	0	0	0	1	0	1	5.01	0.927778	0	0	0	0	0	0	0
Leah Bouterse	28-FEB-17		1	5.4m	1.0	7	0	1	1	1	2	2		0	0	0	1	0	0	0	0	0	0	1	0	1	4.82	0.892593	0	0	0	0	0	0	0
Leah Bouterse	28-FEB-17		1	5.4m	1.0	0	0	1	1	0	2	2		0	0	0	1	0	0	0	0	0	0	1	0	1	4.8	0.888889	0	0	0	0	0	0	0
Leah Bouterse	28-FEB-17		1	5.4m	1.0	0	0	1	1	1	2	2		0	0	0	1	0	0	0	0	0	0	1	0	1	4.74	0.877778	0	0	0	0	0	0	0
Leah Bouterse	28-FEB-17		1	5.4m	1.0	2	0	1	1	1	2	2		0	0	0	1	0	0	0	0	0	0	1	0	1	4.55	0.842593	0	0	0	0	0	0	0
Leah Bouterse	28-FEB-17		1	5.4m	1.0	2	0	1	1	1	2	2		0	0	0	1	0	0	0	0	0	0	1	0	1	4.39	0.812963	0	0	0	0	0	0	0
Leah Bouterse	28-FEB-17		1	5.4m	1.0	2	0	1	1	1	2	2		0	0	0	1	0	0	0	0	0	0	1	0	1	4.37	0.809259	0	0	0	0	0	0	0
Leah Bouterse	28-FEB-17		1	5.4m	1.0	2	0	1	1	1	2	2		0	0	0	1	0	0	0	0	0	0	1	0	1	4.36	0.807407	0	0	0	0	0	0	0
Leah Bouterse	28-FEB-17		1	5.4m	1.0	2	0	1	1	1	2	2		0	0	0	1	0	0	0	0	0	0	1	0	1	4.3	0.796296	0	0	0	0	0	0	0
Leah Bouterse	28-FEB-17		1	5.4m	1.0	2	0	0	1	1	2	2		0	1	0	0	0	0	0	0	0	0	1	0	1	4.3	0.796296	0	0	0	0	0	0	0
Leah Bouterse	28-FEB-17		1	5.4m	1.0	2	0	2	1	1	2	2		0	0	0	0	0	0	1	0	0	0	1	0	1	4.26	0.788889	0	0	0	0	0	0	0
Leah Bouterse	28-FEB-17		1	5.4m	1.0	2	0	1	1	1	2	2		0	0	0	1	0	0	0	0	0	0	1	0	1	4.21	0.77963	0	0	0	0	0	0	0
Leah Bouterse	28-FEB-17		1	5.4m	1.0	2	0	0	1	1	2	2		0	1	0	0	0	0	0	0	0	0	1	0	1	4.15	0.768519	0	0	0	0	0	0	0
Leah Bouterse	28-FEB-17		1	5.4m	1.0	2	0	1	1	1	2	2		0	0	0	1	0	0	0	0	0	0	1	0	1	4.14	0.766667	0	0	0	0	0	0	0
Leah Bouterse	28-FEB-17		1	5.4m	1.0	2	0	1	1	1	2	2		0	0	0	1	0	0	0	0	0	0	1	0	1	4.14	0.766667	0	0	0	0	0	0	0
Leah Bouterse	28-FEB-17		1	5.4m	1.0	2	0	1	1	0	2	2		0	0	0	1	0	0	0	0	0	0	1	0	1	4.04	0.748148	0	0	0	0	0	0	0
Leah Bouterse	28-FEB-17		1	5.4m	1.0	2	0	0	1	1	2	2		0	1	0	0	0	0	0	0	0	0	1	0	1	4.01	0.742593	0	0	0	0	0	0	0
Leah Bouterse	28-FEB-17		1	5.4m	1.0	2	0	1	1	1	2	2		0	0	0	1	0	0	0	0	0	0	1	0	1	3.95	0.731481	0	0	0	0	0	0	0
Leah Bouterse	28-FEB-17		1	5.4m	1.0	2	0	1	1	1	2	2		0	0	0	1	0	0	0	0	0	0	1	0	1	3.92	0.725926	0	0	0	0	0	0	0
Leah Bouterse	28-FEB-17		1	5.4m	1.0	2	0	1	1	1	2	2		0	0	0	1	0	0	0	0	0	0	1	0	1	3.91	0.724074	0	0	0	0	0	0	0
Leah Bouterse	28-FEB-17		1	5.4m	1.0	2	0	1	1	1	2	2		0	0	0	1	0	0	0	0	0	0	1	0	1	3.9	0.722222	0	0	0	0	0	0	0
Leah Bouterse	28-FEB-17		1	5.4m	1.0	2	0	2	1	1	2	2		0	0	0	0	0	0	1	0	0	0	1	0	1	3.76	0.696296	0	0	0	0	0	0	0
Leah Bouterse	28-FEB-17		1	5.4m	1.0	2	0	1	1	1	2	2		0	0	0	1	0	0	0	0	0	0	1	0	1	3.72	0.688889	0	0	0	0	0	0	0
Leah Bouterse	28-FEB-17		1	5.4m	1.0	2	0	0	1	1	2	2		0	1	0	0	0	0	0	0	0	0	1	0	1	3.58	0.662963	0	0	0	0	0	0	0
Leah Bouterse	28-FEB-17		1	5.4m	1.0	2	0	1	1	1	2	2		0	0	0	1	0	0	0	0	0	0	1	0	1	3.57	0.661111	0	0	0	0	0	0	0
Leah Bouterse	28-FEB-17		1	5.4m	1.0	3	1	3	1	1	2	2		0	0	0	0	0	0	0	0	1	0	0	1	1	4.87	0.901852	0	0	0	1	0	2	0
Leah Bouterse	28-FEB-17		1	5.4m	0.0	3	1	1	1	2	2	2		0	0	0	0	1	0	0	0	0	0	0	1	1	5.67	1.05	0	0	0	0	0	0	0
Leah Bouterse	28-FEB-17		1	5.4m	0.0	3	1	1	1	2	2	2		0	0	0	0	1	0	0	0	0	0	0	1	1	5.64	1.04444	0	0	0	0	0	0	0
Leah Bouterse	28-FEB-17		1	5.4m	1.0	3	1	1	1	1	2	2		0	0	0	0	1	0	0	0	0	0	0	1	1	5.51	1.02037	0	0	0	0	0	0	0
Leah Bouterse	28-FEB-17		1	5.4m	1.0	3	1	1	1	1	2	2		0	0	0	0	1	0	0	0	0	0	0	1	1	5.28	0.977778	0	0	0	0	0	0	0
Leah Bouterse	28-FEB-17		1	5.4m	0.0	3	1	1	1	2	2	2		0	0	0	0	1	0	0	0	0	0	0	1	1	4.98	0.922222	0	0	0	0	0	0	0
Leah Bouterse	28-FEB-17		1	5.4m	0.0	3	1	1	1	2	2	2		0	0	0	0	1	0	0	0	0	0	0	1	1	4.91	0.909259	0	0	0	0	0	0	0
Leah Bouterse	28-FEB-17		1	5.4m	0.0	3	1	1	1	2	2	2		0	0	0	0	1	0	0	0	0	0	0	1	1	4.91	0.909259	0	0	0	0	0	0	0
Leah Bouterse	28-FEB-17		1	5.4m	0.0	3	1	1	1	2	2	2		0	0	0	0	1	0	0	0	0	0	0	1	1	4.82	0.892593	0	0	0	0	0	0	0
Leah Bouterse	28-FEB-17		1	5.4m	1.0	3	1	1	1	1	2	2		0	0	0	0	1	0	0	0	0	0	0	1	1	4.73	0.875926	0	0	0	0	0	0	0
Leah Bouterse	28-FEB-17		1	5.4m	1.0	3	1	1	1	1	2	2		0	0	0	0	1	0	0	0	0	0	0	1	1	4.71	0.872222	0	0	0	0	0	0	0
Leah Bouterse	28-FEB-17		1	5.4m	1.0	3	1	1	1	1	2	2		0	0	0	0	1	0	0	0	0	0	0	1	1	4.7	0.87037	0	0	0	0	0	0	0
Leah Bouterse	28-FEB-17		1	5.4m	1.0	3	1	1	1	1	2	2		0	0	0	0	1	0	0	0	0	0	0	1	1	4.65	0.861111	0	0	0	0	0	0	0
Leah Bouterse	28-FEB-17		1	5.4m	0.0	3	1	1	1	2	2	2		0	0	0	0	1	0	0	0	0	0	0	1	1	4.6	0.851852	0	0	0	0	0	0	0
Leah Bouterse	28-FEB-17		1	5.4m	1.0	5	1	2	1	1	2	2		0	0	0	0	0	1	0	0	0	0	0	1	1	4.45	0.824074	0	0	0	0	0	0	0
Leah Bouterse	28-FEB-17		1	5.4m	0.0	3	1	1	1	2	2	2		0	0	0	0	1	0	0	0	0	0	0	1	1	4.44	0.822222	0	0	0	0	0	0	0
Leah Bouterse	28-FEB-17		1	5.4m	0.0	3	1	1	1	2	2	2		0	0	0	0	1	0	0	0	0	0	0	1	1	4.43	0.82037	0	0	0	0	0	0	0
Leah Bouterse	28-FEB-17		1	5.4m	1.0	3	1	1	1	1	2	2		0	0	0	0	1	0	0	0	0	0	0	1	1	4.42	0.818519	0	0	0	0	0	0	0
Leah Bouterse	28-FEB-17		1	5.4m	0.0	3	1	1	1	2	2	2		0	0	0	0	1	0	0	0	0	0	0	1	1	4.38	0.811111	0	0	0	0	0	0	0
Leah Bouterse	28-FEB-17		1	5.4m	0.0	5	1	1	1	2	2	2		0	0	0	0	1	0	0	0	0	0	0	1	1	4.27	0.790741	0	0	0	0	0	0	0
Leah Bouterse	28-FEB-17		1	5.4m	0.0	3	1	1	1	2	2	2		0	0	0	0	1	0	0	0	0	0	0	1	1	4.23	0.783333	0	0	0	0	0	0	0
Leah Bouterse	28-FEB-17		1	5.4m	1.0	2	1	1	1	1	2	2		0	0	0	0	1	0	0	0	0	0	0	1	1	4.21	0.77963	0	0	0	0	0	0	0
Leah Bouterse	28-FEB-17		1	5.4m	1.0	5	1	2	1	1	2	2		0	0	0	0	0	1	0	0	0	0	0	1	1	4.2	0.777778	0	0	0	0	0	0	0
Leah Bouterse	28-FEB-17		1	5.4m	1.0	3	1	1	1	1	2	2		0	0	0	0	1	0	0	0	0	0	0	1	1	4.17	0.772222	0	0	0	0	0	0	0
Leah Bouterse	28-FEB-17		1	5.4m	0.0	3	1	1	1	2	2	2		0	0	0	0	1	0	0	0	0	0	0	1	1	4.15	0.768519	0	0	0	0	0	0	0
Leah Bouterse	28-FEB-17		1	5.4m	1.0	3	1	1	1	1	2	2		0	0	0	0	1	0	0	0	0	0	0	1	1	4.1	0.759259	0	0	0	0	0	0	0
Leah Bouterse	28-FEB-17		1	5.4m	1.0	3	1	1	1	0	2	1		0	0	0	0	1	0	0	0	0	0	0	1	1	4.04	0.748148	0	0	0	0	0	0	0
Leah Bouterse	28-FEB-17		1	5.4m	1.0	3	1	1	1	1	2	2		0	0	0	0	1	0	0	0	0	0	0	1	1	3.92	0.725926	0	0	0	0	0	0	0
Leah Bouterse	28-FEB-17		1	5.4m	1.0	3	1	1	1	1	2	2		0	0	0	0	1	0	0	0	0	0	0	1	1	3.86	0.714815	0	0	0	0	0	0	0
Leah Bouterse	28-FEB-17		1	5.4m	1.0	3	1	1	1	1	2	2		0	0	0	0	1	0	0	0	0	0	0	1	1	3.61	0.668519	0	0	0	0	0	0	0
Leah Bouterse	28-FEB-17		1	5.4m	0.0	3	1	1	1	3	2	2		0	0	0	0	1	0	0	0	0	0	0	1	1	3.49	0.646296	0	0	0	0	0	0	0
Leah Bouterse	28-FEB-17		1	5.4m	1.0	3	1	1	1	1	2	2		0	0	0	0	1	0	0	0	0	0	0	1	1	3.49	0.646296	0	0	0	0	0	0	0
Leah Bouterse	28-FEB-17		1	5.4m	1.0	5	1	1	1	1	2	2		0	0	0	1	0	0	0	0	0	0	1	0	1	3.45	0.638889	0	0	0	0	0	0	0
Leah Bouterse	28-FEB-17		1	5.4m	1.0	3	1	1	1	1	2	2		0	0	0	0	1	0	0	0	0	0	0	1	1	3.25	0.601852	0	0	0	0	0	0	0
Leah Bouterse	28-FEB-17		1	5.4m	1.0	3	1	1	1	0	2	2		0	0	0	0	1	0	0	0	0	0	0	1	1	3.24	0.6	0	0	0	0	0	0	0
Leah Bouterse	28-FEB-17		1	5.4m	0.0	3	1	1	1	2	2	2		0	0	0	0	1	0	0	0	0	0	0	1	1	3.18	0.588889	0	0	0	0	0	0	0
Leah Bouterse	28-FEB-17		1	5.4m	1.0	3	1	1	1	1	2	2		0	0	0	0	1	0	0	0	0	0	0	1	1	3.17	0.587037	0	0	0	0	0	0	0
Leah Bouterse	28-FEB-17		1	5.4m	1.0	3	1	1	1	3	2	2		0	0	0	0	1	0	0	0	0	0	0	1	1	3.08	0.57037	0	0	0	0	0	0	0
Leah Bouterse	28-FEB-17		1	5.4m	1.0	3	1	1	1	0	3	3		0	0	0	0	1	0	0	0	0	0	0	1	1	5.68	1.05185	0	0	0	1	0	4	0
Leah Bouterse	28-FEB-17		1	5.4m	1.0	3	1	1	1	0	3	3		0	0	0	0	1	0	0	0	0	0	0	1	1	4.9	0.907407	0	0	0	1	0	4	0
Leah Bouterse	28-FEB-17		1	5.4m	1.0	5	1	1	1	0	3	3		0	0	0	0	0	1	0	0	0	0	0	1	1	4.48	0.82963	0	0	0	1	0	4	0
Leah Bouterse	28-FEB-17		1	5.4m	1.0	3	1	1	1	2	1	2		1	0	0	1	1	0	0	0	0	1	0	1	1	4.65	0.861111	0	0	0	0	0	0	6
Leah Bouterse	28-FEB-17		1	5.4m	1.0	0	0	2	1	1	2	2		1	0	0	0	0	0	2	0	0	0	2	0	2	4.92	0.911111	1	0	0	0	1	0	1
Leah Bouterse	28-FEB-17		1	5.4m	0.0	2	0	1	1	2	2	2		1	0	0	2	0	0	0	0	0	0	2	0	2	4.05	0.75	1	0	0	0	1	0	1
Leah Bouterse	28-FEB-17		1	5.4m	1.0	3	1	1	1	1	2	2		1	0	0	1	1	0	0	0	0	0	1	1	2	6.81	1.26111	1	0	0	0	1	0	6
Leah Bouterse	28-FEB-17		1	5.4m	1.0	3	1	1	1	1	2	2		1	0	0	1	0	0	0	0	0	0	1	1	2	5.51	1.02037	1	0	0	0	1	0	6
Leah Bouterse	28-FEB-17		1	5.4m	1.0	3	1	1	1	0	2	2		1	0	0	1	1	0	0	0	0	0	1	1	2	5.11	0.946296	1	0	0	0	1	0	6
Leah Bouterse	28-FEB-17		1	5.4m	0.0	3	1	1	1	2	2	2		1	0	0	1	1	0	0	0	0	0	1	1	2	5.01	0.927778	1	0	0	0	1	0	6
Leah Bouterse	28-FEB-17		1	5.4m	0.0	2	1	1	1	2	2	2		1	0	0	1	1	0	0	0	0	0	1	1	2	4.76	0.881481	1	0	0	0	1	0	6
Leah Bouterse	28-FEB-17		1	5.4m	1.0	2	0	1	1	1	2	2		1	0	0	1	1	0	0	0	0	0	1	1	2	5.65	1.0463	0	1	0	0	2	0	6
Leah Bouterse	28-FEB-17		1	5.4m	1.0	2	0	1	1	1	2	2		1	0	0	1	1	0	0	0	0	0	1	1	2	5.38	0.996296	0	1	0	0	2	0	6
Leah Bouterse	28-FEB-17		1	5.4m	0.0	2	0	1	1	2	2	2		1	0	0	1	1	0	0	0	0	0	1	1	2	4.5	0.833333	0	1	0	0	2	0	6
Leah Bouterse	28-FEB-17		1	5.4m	1.0	2	0	1	1	1	2	2		1	0	0	1	1	0	0	0	0	0	1	1	2	4.17	0.772222	0	1	0	0	2	0	6
Leah Bouterse	28-FEB-17		1	5.4m	0.0	2	0	1	1	2	2	2		1	0	0	1	1	1	0	0	0	0	1	2	3	5.23	0.968519	0	1	0	0	2	0	6
Leah Bouterse	28-FEB-17		1	5.4m	1.0	5	1	2	1	1	2	2		1	0	0	0	0	2	0	0	0	0	0	2	2	6.58	1.21852	0	1	0	0	2	0	2
Leah Bouterse	28-FEB-17		1	5.4m	1.0	3	1	2	1	0	2	2		1	0	0	0	0	2	0	0	0	0	0	2	2	3.78	0.7	0	1	0	0	2	0	2
Leah Bouterse	28-FEB-17		1	5.4m	1.0	3	1	1	1	2	1	2		1	0	0	0	1	0	0	3	0	0	3	1	4	5.08	0.940741	1	0	0	1	3	2	4
Leah Bouterse	28-FEB-17		1	5.4m	0.0	2	0	1	1	2	2	2		1	0	0	1	0	0	0	1	0	0	2	0	2	6.17	1.14259	1	0	0	1	3	2	3
Leah Bouterse	28-FEB-17		1	5.4m	1.0	2	0	2	1	1	2	2		1	0	0	0	0	0	1	1	0	0	2	0	2	4.32	0.8	1	0	0	1	3	2	3
Leah Bouterse	28-FEB-17		1	5.4m	1.0	2	0	3	1	1	2	2		1	0	0	0	0	0	0	2	0	0	2	0	2	4.79	0.887037	1	0	0	1	3	2	7
Leah Bouterse	28-FEB-17		1	5.4m	1.0	2	0	3	1	1	2	2		1	0	0	0	0	0	0	3	0	0	3	0	3	5.23	0.968519	1	0	0	1	3	2	7
Leah Bouterse	28-FEB-17		1	5.4m	0.0	3	1	1	1	2	2	2		1	0	0	0	1	0	0	1	0	0	1	1	2	5.5	1.01852	1	0	0	1	3	2	4
Leah Bouterse	28-FEB-17		1	5.4m	0.0	3	1	1	1	2	2	2		1	0	0	0	1	0	0	1	0	0	1	1	2	5.39	0.998148	1	0	0	1	3	2	4
Leah Bouterse	28-FEB-17		1	5.4m	0.0	3	1	1	1	2	2	2		1	0	0	0	1	0	0	1	0	0	1	1	2	5.29	0.97963	1	0	0	1	3	2	4
Leah Bouterse	28-FEB-17		1	5.4m	0.0	3	1	1	1	2	2	2		1	0	0	0	1	0	0	0	1	0	1	1	2	4.94	0.914815	1	0	0	1	3	2	4
Leah Bouterse	28-FEB-17		1	5.4m	1.0	3	1	1	1	1	2	2		1	0	0	0	1	0	0	1	0	0	1	1	2	4.33	0.801852	1	0	0	1	3	2	4
Leah Bouterse	28-FEB-17		1	5.4m	1.0	3	1	3	1	1	2	2		1	0	0	0	0	0	0	1	1	0	1	1	2	5.74	1.06296	1	0	0	1	3	2	7
Leah Bouterse	28-FEB-17		1	5.4m	0.0	3	1	1	1	2	2	2		1	0	0	0	1	0	0	2	0	0	2	1	3	6.01	1.11296	1	0	0	1	3	2	4
Leah Bouterse	28-FEB-17		1	5.4m	0.0	2	0	1	1	2	2	2		1	0	0	0	1	0	0	1	0	0	1	1	2	5.17	0.957407	0	1	0	1	4	2	5
Leah Bouterse	28-FEB-17		1	5.4m	0.0	2	0	1	1	2	2	2		1	0	0	1	1	0	0	0	1	0	1	2	3	5.64	1.04444	0	1	0	1	4	2	5
Leah Bouterse	28-FEB-17		1	5.4m	0.0	3	1	1	1	2	2	2		1	0	0	0	1	0	0	0	1	0	0	2	2	5.91	1.09444	0	1	0	1	4	2	4
Leah Bouterse	28-FEB-17		1	5.4m	0.0	2	1	1	1	2	2	2		1	0	0	0	1	0	0	0	1	0	0	2	2	5.57	1.03148	0	1	0	1	4	2	4
Leah Bouterse	28-FEB-17		1	5.4m	1.0	3	1	1	1	0	2	1		1	0	0	0	1	0	0	0	1	0	0	2	2	4.81	0.890741	0	1	0	1	4	2	4
Leah Bouterse	28-FEB-17		1	5.4m	1.0	3	1	1	1	0	2	2		1	0	0	2	2	0	0	0	0	0	2	2	4	6.41	1.18704	0	0	1	0	6	0	6
A. Bellville	01-MAR-17		1	5.4m	1.0	2	0	1	0					0	0	0	1	0	0	0	0	0	0	1	0	1	3.78	0.7	0	0	0	0	0	0	0
A. Bellville	01-MAR-17		1	5.4m	1.0	2	0	1	0					0	0	0	1	0	0	0	0	0	0	1	0	1	6.34	1.17407	0	0	0	0	0	0	0
A. Bellville	01-MAR-17		1	5.4m	1.0	2	0	1	0					0	0	0	1	0	0	0	0	0	0	0	1	1	4.55	0.842593	0	0	0	0	0	0	0
A. Bellville	01-MAR-17		1	5.4m	1.0	2	0	1	0					0	0	0	1	0	0	0	0	0	0	1	0	1	4.53	0.838889	0	0	0	0	0	0	0
A. Bellville	01-MAR-17		1	5.4m	1.0	2	0	1	0					0	0	0	1	0	0	0	0	0	0	1	0	1	4.48	0.82963	0	0	0	0	0	0	0
A. Bellville	01-MAR-17		1	5.4m	1.0	2	0	1	0					0	0	0	1	0	0	0	0	0	0	1	0	1	3.08	0.57037	0	0	0	0	0	0	0
A. Bellville	01-MAR-17		1	5.4m	1.0	3	1	1	0					0	0	0	0	1	0	0	0	0	0	0	1	1	5.97	1.10556	0	0	0	0	0	0	0
A. Bellville	01-MAR-17		1	5.4m	1.0	3	1	1	0					0	0	0	0	1	0	0	0	0	0	0	1	1	4.5	0.833333	0	0	0	0	0	0	0
A. Bellville	01-MAR-17		1	5.4m	1.0	3	1	1	0					0	0	0	0	1	0	0	0	0	0	0	1	1	4.34	0.803704	0	0	0	0	0	0	0
A. Bellville	01-MAR-17		1	5.4m	1.0	3	1	1	0					0	0	0	0	1	0	0	0	0	0	0	1	1	3.79	0.701852	0	0	0	0	0	0	0
A. Bellville	01-MAR-17		1	5.4m	1.0	3	1	1	0					0	0	0	0	1	0	0	0	0	0	0	1	1	3.54	0.655556	0	0	0	0	0	0	0
A. Bellville	01-MAR-17		1	5.4m	1.0	3	1	1	1	1	1	2		0	0	0	0	1	0	0	0	0	0	0	1	1	4.21	0.77963	0	0	0	0	0	0	0
A. Bellville	01-MAR-17		1	5.4m	1.0	2	0	1	1	2	2	2		0	0	0	1	0	0	0	0	0	0	1	0	1	6.7	1.24074	0	0	0	0	0	0	0
A. Bellville	01-MAR-17		1	5.4m	1.0	2	0	1	1	2	2	2		0	0	0	1	0	0	0	0	0	0	1	0	1	5.74	1.06296	0	0	0	0	0	0	0
A. Bellville	01-MAR-17		1	5.4m	1.0	2	0	1	1	2	2	2		0	0	0	1	0	0	0	0	0	0	1	0	1	4.98	0.922222	0	0	0	0	0	0	0
A. Bellville	01-MAR-17		1	5.4m	1.0	2	0	1	1	2	2	2		0	0	0	1	0	0	0	0	0	0	1	0	1	4.61	0.853704	0	0	0	0	0	0	0
A. Bellville	01-MAR-17		1	5.4m	1.0	2	0	1	1	2	2	3		0	0	0	1	0	0	0	0	0	0	1	0	1	4.57	0.846296	0	0	0	0	0	0	0
A. Bellville	01-MAR-17		1	5.4m	1.0	2	0	1	1	2	2	2		0	0	0	1	0	0	0	0	0	0	1	0	1	3.88	0.718519	0	0	0	0	0	0	0
A. Bellville	01-MAR-17		1	5.4m	1.0	2	0	1	1	2	2	2		0	0	0	1	0	0	0	0	0	0	1	0	1	3.74	0.692593	0	0	0	0	0	0	0
A. Bellville	01-MAR-17		1	5.4m	1.0	2	0	1	1	2	2	1		0	0	0	1	0	0	0	0	0	0	1	0	1	3.25	0.601852	0	0	0	0	0	0	0
A. Bellville	01-MAR-17		1	5.4m	1.0	5	1	2	1	1	2	2		0	0	0	0	0	1	0	0	0	0	0	1	1	6.75	1.25	0	0	0	0	0	0	0
A. Bellville	01-MAR-17		1	5.4m	1.0	3	1	1	1	2	2	2		0	0	0	0	1	0	0	0	0	0	0	1	1	6.64	1.22963	0	0	0	0	0	0	0
A. Bellville	01-MAR-17		1	5.4m	1.0	3	1	1	1	1	2	2		0	0	0	0	1	0	0	0	0	0	0	1	1	6.51	1.20556	0	0	0	0	0	0	0
A. Bellville	01-MAR-17		1	5.4m	1.0	3	1	1	1	2	2	2		0	0	0	0	1	0	0	0	0	0	0	1	1	6.14	1.13704	0	0	0	0	0	0	0
A. Bellville	01-MAR-17		1	5.4m	1.0	3	1	1	1	2	2	2		0	0	0	0	1	0	0	0	0	0	0	1	1	5.51	1.02037	0	0	0	0	0	0	0
A. Bellville	01-MAR-17		1	5.4m	1.0	3	1	1	1	2	2	2		0	0	0	0	1	0	0	0	0	0	0	1	1	5.51	1.02037	0	0	0	0	0	0	0
A. Bellville	01-MAR-17		1	5.4m	1.0	3	1	1	1	2	2	2		0	0	0	0	1	0	0	0	0	0	0	1	1	4.63	0.857407	0	0	0	0	0	0	0
A. Bellville	01-MAR-17		1	5.4m	1.0	5	1	2	1	2	2	2		0	0	0	0	0	1	0	0	0	0	0	1	1	4.51	0.835185	0	0	0	0	0	0	0
A. Bellville	01-MAR-17		1	5.4m	1.0	3	1	1	1	1	2	2		0	0	0	0	1	0	0	0	0	0	0	1	1	4.4	0.814815	0	0	0	0	0	0	0
A. Bellville	01-MAR-17		1	5.4m	1.0	3	1	1	1	2	2	2		0	0	0	0	1	0	0	0	0	0	0	1	1	4.38	0.811111	0	0	0	0	0	0	0
A. Bellville	01-MAR-17		1	5.4m	1.0	3	1	1	1	1	2	2		0	0	0	0	1	0	0	0	0	0	0	1	1	4.18	0.774074	0	0	0	0	0	0	0
A. Bellville	01-MAR-17		1	5.4m	1.0	3	1	1	1	1	2	1		0	0	0	0	1	0	0	0	0	0	0	1	1	4.06	0.751852	0	0	0	0	0	0	0
A. Bellville	01-MAR-17		1	5.4m	1.0	3	1	1	1	2	2	2		0	0	0	0	1	0	0	0	0	0	0	1	1	3.97	0.735185	0	0	0	0	0	0	0
A. Bellville	01-MAR-17		1	5.4m	1.0	3	1	1	1	2	2	2		0	0	0	0	1	0	0	0	0	0	0	1	1	3.94	0.72963	0	0	0	0	0	0	0
A. Bellville	01-MAR-17		1	5.4m	1.0	3	1	1	1	2	2	2		0	0	0	0	1	0	0	0	0	0	0	1	1	3.85	0.712963	0	0	0	0	0	0	0
A. Bellville	01-MAR-17		1	5.4m	1.0	3	1	1	1	1	2	2		0	0	0	0	1	0	0	0	0	0	0	1	1	3.65	0.675926	0	0	0	0	0	0	0
A. Bellville	01-MAR-17		1	5.4m	1.0	3	1	1	1	2	2	2		0	0	0	0	1	0	0	0	0	0	0	1	1	3.6	0.666667	0	0	0	0	0	0	0
A. Bellville	01-MAR-17		1	5.4m	1.0	2	0	1	0					1	0	0	1	0	0	0	0	0	1	1	0	1	3.41	0.631481	0	0	0	0	0	0	6
A. Bellville	01-MAR-17		1	5.4m	1.0	3	1	1	1	2	2			1	0	0	0	0	0	0	0	0	1	0	1	1	4.44	0.822222	0	0	0	0	0	0	6
A. Bellville	01-MAR-17		1	5.4m	1.0	3	1	1	0					1	0	0	1	1	0	0	0	0	0	1	1	2	4.77	0.883333	1	0	0	0	1	0	6
A. Bellville	01-MAR-17		1	5.4m	1.0	4	0	2	1	1	2	2		1	0	0	0	0	0	2	0	0	0	2	0	2	8.94	1.65556	1	0	0	0	1	0	1
A. Bellville	01-MAR-17		1	5.4m	1.0	2	0	1	0					1	0	0	1	1	0	0	0	0	1	1	1	2	6.86	1.27037	0	1	0	0	2	0	6
A. Bellville	01-MAR-17		1	5.4m	1.0	2	0	1	0					1	0	0	1	1	0	0	0	0	1	1	1	2	3.6	0.666667	0	1	0	0	2	0	6
A. Bellville	01-MAR-17		1	5.4m	1.0	2	0	1	0					1	0	0	1	1	0	0	0	0	0	1	1	2	5.3	0.981481	0	1	0	0	2	0	6
A. Bellville	01-MAR-17		1	5.4m	1.0	3	1	1	0					1	0	0	0	2	0	0	0	0	0	0	2	2	4.17	0.772222	0	1	0	0	2	0	2
A. Bellville	01-MAR-17		1	5.4m	1.0	3	1	1	1	0	1	1		1	0	0	0	2	0	0	0	0	0	0	2	2	4.34	0.803704	0	1	0	0	2	0	2
A. Bellville	01-MAR-17		1	5.4m	1.0	3	1	1	1	2	1	2		1	0	0	0	3	0	0	0	0	0	0	3	3	6.68	1.23704	0	1	0	0	2	0	2
A. Bellville	01-MAR-17		1	5.4m	1.0	2	0	1	1	1	2	2		1	0	0	1	0	0	0	1	0	0	0	2	2	5.61	1.03889	0	0	0	1	3	2	3
A. Bellville	01-MAR-17		1	5.4m	1.0	3	1	1	1	0	3	3	0	1	0	0	1	1	0	0	0	0	0	1	1	2	4.94	0.914815	1	0	0	1	3	4	5
A. Bellville	01-MAR-17		1	5.4m	1.0	3	1	1	1	0	2	2		1	0	0	1	0	0	0	0	2	0	0	3	3	4.14	0.766667	0	1	0	1	4	2	4
A. Bellville	01-MAR-17		1	5.4m	1.0	3	1	1	1	0	3	3	0	1	0	0	0	1	0	0	1	1	0	1	2	3	5.58	1.03333	0	0	1	1	5	3	4
A. Bellville	01-MAR-17		1	5.4m	1.0	3	1	1	1	2	1	2		1	0	0	0	1	0	0	1	1	1	1	2	3	6.31	1.16852	0	0	1	1	10	2	4
A. Bellville	03-MAR-17		1	5.4m	1.0	2	0	1	0					0	0	0	1	0	0	0	0	0	0	1	0	1	4.28	0.792593	0	0	0	0	0	0	0
A. Bellville	03-MAR-17		1	5.4m	1.0	2	0	1	0					0	0	0	1	0	0	0	0	0	0	1	0	1	3.61	0.668519	0	0	0	0	0	0	0
A. Bellville	03-MAR-17		1	5.4m	1.0	2	0	1	0					0	0	0	1	0	0	0	0	0	0	1	0	1	3.41	0.631481	0	0	0	0	0	0	0
A. Bellville	03-MAR-17		1	5.4m	1.0	3	1	1	0					0	0	0	0	1	0	0	0	0	0	0	1	1	4.31	0.798148	0	0	0	0	0	0	0
A. Bellville	03-MAR-17		1	5.4m	1.0	3	1	1	0					0	0	0	0	1	0	0	0	0	0	0	1	1	4.67	0.864815	0	0	0	0	0	0	0
A. Bellville	03-MAR-17		1	5.4m	1.0	3	1	1	0					0	0	0	0	1	0	0	0	0	0	0	1	1	4.57	0.846296	0	0	0	0	0	0	0
A. Bellville	03-MAR-17		1	5.4m	1.0	2	0	1	1	2	1	1		0	0	0	1	0	0	0	0	0	0	1	0	1	4.21	0.77963	0	0	0	0	0	0	0
A. Bellville	03-MAR-17		1	5.4m	1.0	3	1	1	1	2	1	1		0	0	0	0	1	0	0	0	0	0	0	1	1	4.87	0.901852	0	0	0	0	0	0	0
A. Bellville	03-MAR-17		1	5.4m	1.0	3	1	1	1	0	1	1		0	0	0	0	1	0	0	0	0	0	0	1	1	3.97	0.735185	0	0	0	0	0	0	0
A. Bellville	03-MAR-17		1	5.4m	1.0	2	0	1	1	1	2	2		0	0	0	1	0	0	0	0	0	0	1	0	1	5.38	0.996296	0	0	0	0	0	0	0
A. Bellville	03-MAR-17		1	5.4m	1.0	2	0	1	1	2	2	2		0	0	0	1	0	0	0	0	0	0	1	0	1	5.04	0.933333	0	0	0	0	0	0	0
A. Bellville	03-MAR-17		1	5.4m	1.0	2	0	1	1	2	2	2		0	0	0	1	0	0	0	0	0	0	1	0	1	4.77	0.883333	0	0	0	0	0	0	0
A. Bellville	03-MAR-17		1	5.4m	1.0	2	0	1	1	1	2	2		0	0	0	1	0	0	0	0	0	0	1	0	1	4.18	0.774074	0	0	0	0	0	0	0
A. Bellville	03-MAR-17		1	5.4m	1.0	2	0	1	1	2	2	2		0	0	0	1	0	0	0	0	0	0	1	0	1	3.38	0.625926	0	0	0	0	0	0	0
A. Bellville	03-MAR-17		1	5.4m	1.0	2	0	1	1	1	2	2		0	0	0	1	0	0	0	0	0	0	0	1	1	3.26	0.603704	0	0	0	0	0	0	0
A. Bellville	03-MAR-17		1	5.4m	1.0	2	0	1	1	1	2	3		0	0	0	1	0	0	0	0	0	0	1	0	1	3.14	0.581481	0	0	0	0	0	0	0
A. Bellville	03-MAR-17		1	5.4m	1.0	2	0	1	1	2	2	3		0	0	0	1	0	0	0	0	0	0	1	0	1	2.87	0.531481	0	0	0	0	0	0	0
A. Bellville	03-MAR-17		1	5.4m	1.0	5	1	2	1	2	2	2		0	0	0	0	0	1	0	0	0	0	1	0	1	3.8	0.703704	0	0	0	0	0	0	0
A. Bellville	03-MAR-17		1	5.4m	1.0	3	1	1	1	2	2	2		0	0	0	0	1	0	0	0	0	0	0	1	1	5.54	1.02593	0	0	0	0	0	0	0
A. Bellville	03-MAR-17		1	5.4m	1.0	3	1	1	1	2	2	2		0	0	0	0	1	0	0	0	0	0	0	1	1	5.04	0.933333	0	0	0	0	0	0	0
A. Bellville	03-MAR-17		1	5.4m	1.0	3	1	1	1	2	2	2		0	0	0	0	1	0	0	0	0	0	0	1	1	4.88	0.903704	0	0	0	0	0	0	0
A. Bellville	03-MAR-17		1	5.4m	1.0	3	1	1	1	2	2	2		0	0	0	0	1	0	0	0	0	0	0	1	1	4.39	0.812963	0	0	0	0	0	0	0
A. Bellville	03-MAR-17		1	5.4m	1.0	3	1	1	1	1	2	2		0	0	0	0	1	0	0	0	0	0	0	1	1	4.17	0.772222	0	0	0	0	0	0	0
A. Bellville	03-MAR-17		1	5.4m	1.0	3	1	1	1	2	2			0	0	0	0	1	0	0	0	0	0	0	1	1	4.01	0.742593	0	0	0	0	0	0	0
A. Bellville	03-MAR-17		1	5.4m	1.0	3	1	1	1	2	2	2		0	0	0	0	1	0	0	0	0	0	0	1	1	3.73	0.690741	0	0	0	0	0	0	0
A. Bellville	03-MAR-17		1	5.4m	1.0	3	1	1	1	2	2	2		0	0	0	0	1	0	0	0	0	0	0	1	1	3.68	0.681481	0	0	0	0	0	0	0
A. Bellville	03-MAR-17		1	5.4m	1.0	3	1	1	1	2	2	2		0	0	0	0	1	0	0	0	0	0	0	1	1	3.4	0.62963	0	0	0	0	0	0	0
A. Bellville	03-MAR-17		1	5.4m	1.0	3	1	1	1	2	2	2		1	0	0	1	1	0	0	0	0	0	1	1	2	4.35	0.805556	1	0	0	0	1	0	6
A. Bellville	03-MAR-17		1	5.4m	1.0	3	1	1	1	2	2	1		1	0	0	1	1	0	0	0	0	0	1	1	2	4.32	0.8	1	0	0	0	1	0	6
A. Bellville	03-MAR-17		1	5.4m	1.0	5	1	2	1	1	2	2		1	0	0	0	0	1	2	0	0	0	2	1	3	4.3	0.796296	1	0	0	0	1	0	6
A. Bellville	03-MAR-17		1	5.4m	1.0	2	0	1	0					1	0	0	1	1	0	0	0	0	0	1	1	2	3.97	0.735185	0	1	0	0	2	0	6
A. Bellville	03-MAR-17		1	5.4m	1.0	2	0	1	1	0	1	1		1	0	0	1	1	0	0	0	0	0	1	1	2	5.51	1.02037	0	1	0	0	2	0	6
A. Bellville	03-MAR-17		1	5.4m	1.0	3	1	1	1	2	2	2		1	0	0	0	2	0	0	0	0	0	0	2	2	6.4	1.18519	0	1	0	0	2	0	2
A. Bellville	03-MAR-17		1	5.4m	1.0	3	1	1	1	1	2	2		1	0	0	0	2	0	0	0	0	0	0	2	2	4.79	0.887037	0	1	0	0	2	0	2
A. Bellville	03-MAR-17		1	5.4m	1.0	3	1	1	0					1	0	0	0	1	0	0	2		0	2	1	3	6.25	1.15741	1	0	0	1	3	3	4
A. Bellville	03-MAR-17		1	5.4m	1.0	3	1	1	1	2	2	2		1	0	0	0	1	0	0	1	0	0	1	1	2	5.39	0.998148	1	0	0	1	3	2	4
A. Bellville	03-MAR-17		1	5.4m	1.0	3	1	1	1	1	2	2		1	0	0	0	1	0	0	2	1	0	2	2	4	6.02	1.11481	0	0	1	1	5	2	4
A. Bellville	03-MAR-17		1	5.4m	1.0	3	1	1	1	0	3	3		1	0	0	0	1	0	0	0	0	1	0	1	1	4.61	0.853704	0	0	0	1	10	4	4
Leah Bouterse	08-MAR-17		1	5.4m	1.0	3	1	1	1	2	0	3	1	0	0	0	0	1	0	0	0	0	0	0	1	1	5.97	1.10556	0	0	0	1	0	1	0
Leah Bouterse	08-MAR-17		1	5.4m	1.0	3	1	1	1	0	0	3	1	0	0	0	0	1	0	0	0	0	0	0	1	1	4.99	0.924074	0	0	0	1	0	1	0
Leah Bouterse	08-MAR-17		1	5.4m	1.0	3	1	1	1	2	1	3		0	0	0	0	1	0	0	0	0	0	0	1	1	4.86	0.9	0	0	0	0	0	0	0
Leah Bouterse	08-MAR-17		1	5.4m	1.0	2	0	3	1	1	2	3		0	0	0	0	0	0	0	1	0	0	1	0	1	3.59	0.664815	0	0	0	1	0	2	0
Leah Bouterse	08-MAR-17		1	5.4m	1.0	2	0	0	1	3	2	3		0	1	1	0	0	0	0	0	0	0	0	1	1	7.81	1.4463	0	0	0	0	0	0	0
Leah Bouterse	08-MAR-17		1	5.4m	1.0	2	0	1	1	2	2	3		0	0	0	1	0	0	0	0	0	0	1	0	1	6.21	1.15	0	0	0	0	0	0	0
Leah Bouterse	08-MAR-17		1	5.4m	1.0	2	0	1	1	0	2	3		0	0	0	1	0	0	0	0	0	0	1	0	1	5.9	1.09259	0	0	0	0	0	0	0
Leah Bouterse	08-MAR-17		1	5.4m	1.0	0	0	1	1	2	2	3		0	0	0	1	0	0	0	0	0	0	1	0	1	5.78	1.07037	0	0	0	0	0	0	0
Leah Bouterse	08-MAR-17		1	5.4m	1.0	5	0	1	1	3	2	3		0	0	0	1	0	0	0	0	0	0	1	0	1	5.52	1.02222	0	0	0	0	0	0	0
Leah Bouterse	08-MAR-17		1	5.4m	1.0	2	0	1	1	3	2	2		0	0	0	1	0	0	0	0	0	0	1	0	1	4.97	0.92037	0	0	0	0	0	0	0
Leah Bouterse	08-MAR-17		1	5.4m	1.0	2	0	1	1	3	2	2		0	0	0	1	0	0	0	0	0	0	1	0	1	4.95	0.916667	0	0	0	0	0	0	0
Leah Bouterse	08-MAR-17		1	5.4m	1.0	2	0	1	1	3	2	2		0	0	0	1	0	0	0	0	0	0	1	0	1	4.38	0.811111	0	0	0	0	0	0	0
Leah Bouterse	08-MAR-17		1	5.4m	1.0	1	0	1	1	3	2	2		0	0	0	1	0	0	0	0	0	0	1	0	1	4.19	0.775926	0	0	0	0	0	0	0
Leah Bouterse	08-MAR-17		1	5.4m	1.0	2	0	1	1	3	2	2		0	0	0	1	0	0	0	0	0	0	1	0	1	4.18	0.774074	0	0	0	0	0	0	0
Leah Bouterse	08-MAR-17		1	5.4m	1.0	2	0	1	1	3	2	2		0	0	0	1	0	0	0	0	0	0	1	0	1	4.18	0.774074	0	0	0	0	0	0	0
Leah Bouterse	08-MAR-17		1	5.4m	1.0	6	0	1	1	0	2	3		0	0	0	1	0	0	0	0	0	0	1	0	1	4.11	0.761111	0	0	0	0	0	0	0
Leah Bouterse	08-MAR-17		1	5.4m	1.0	2	0	1	1	3	2	2		0	0	0	1	0	0	0	0	0	0	1	0	1	3.94	0.72963	0	0	0	0	0	0	0
Leah Bouterse	08-MAR-17		1	5.4m	1.0	2	0	1	1	0	2	3		0	0	0	1	0	0	0	0	0	0	1	0	1	3.87	0.716667	0	0	0	0	0	0	0
Leah Bouterse	08-MAR-17		1	5.4m	1.0	2	0	1	1	0	2	3		0	0	0	1	0	0	0	0	0	0	1	0	1	3.63	0.672222	0	0	0	0	0	0	0
Leah Bouterse	08-MAR-17		1	5.4m	1.0	3	1	0	1	2	2	3		0	0	1	0	0	0	0	0	0	0	0	1	1	6.31	1.16852	0	0	0	0	0	0	0
Leah Bouterse	08-MAR-17		1	5.4m	1.0	3	1	1	1	1	2	3		0	0	0	0	1	0	0	0	0	0	0	1	1	6.02	1.11481	0	0	0	0	0	0	0
Leah Bouterse	08-MAR-17		1	5.4m	1.0	3	1	1	1	3	2	2		0	0	0	0	1	0	0	0	0	0	0	1	1	5.81	1.07593	0	0	0	0	0	0	0
Leah Bouterse	08-MAR-17		1	5.4m	1.0	3	1	1	1	2	2	3		0	0	0	0	1	0	0	0	0	0	0	1	1	5.63	1.04259	0	0	0	0	0	0	0
Leah Bouterse	08-MAR-17		1	5.4m	1.0	3	1	1	1	3	2	2		0	0	0	0	1	0	0	0	0	0	0	1	1	5.1	0.944444	0	0	0	0	0	0	0
Leah Bouterse	08-MAR-17		1	5.4m	1.0	3	1	1	1	3	2	2		0	0	0	0	1	0	0	0	0	0	0	1	1	4.82	0.892593	0	0	0	0	0	0	0
Leah Bouterse	08-MAR-17		1	5.4m	1.0	3	1	1	1	3	2	2		0	0	0	0	1	0	0	0	0	0	0	1	1	4.82	0.892593	0	0	0	0	0	0	0
Leah Bouterse	08-MAR-17		1	5.4m	1.0	3	1	1	1	3	2	2		0	0	0	0	1	0	0	0	0	0	0	1	1	4.81	0.890741	0	0	0	0	0	0	0
Leah Bouterse	08-MAR-17		1	5.4m	1.0	3	1	1	1	1	2	3		0	0	0	0	1	0	0	0	0	0	0	1	1	4.71	0.872222	0	0	0	0	0	0	0
Leah Bouterse	08-MAR-17		1	5.4m	1.0	3	1	1	1	3	2	2		0	0	0	0	1	0	0	0	0	0	0	1	1	4.68	0.866667	0	0	0	0	0	0	0
Leah Bouterse	08-MAR-17		1	5.4m	1.0	3	1	1	1	3	2	2		0	0	0	0	1	0	0	0	0	0	0	1	1	4.5	0.833333	0	0	0	0	0	0	0
Leah Bouterse	08-MAR-17		1	5.4m	1.0	3	1	1	1	3	2	2		0	0	0	0	1	0	0	0	0	0	0	1	1	4.38	0.811111	0	0	0	0	0	0	0
Leah Bouterse	08-MAR-17		1	5.4m	1.0	3	1	1	1	3	2	3		0	0	0	0	1	0	0	0	0	0	0	1	1	4.15	0.768519	0	0	0	0	0	0	0
Leah Bouterse	08-MAR-17		1	5.4m	1.0	3	1	1	1	3	2	2		0	0	0	0	1	0	0	0	0	0	0	1	1	4.06	0.751852	0	0	0	0	0	0	0
Leah Bouterse	08-MAR-17		1	5.4m	1.0	3	1	1	1	3	2	2		0	0	0	0	1	0	0	0	0	0	0	1	1	3.55	0.657407	0	0	0	0	0	0	0
Leah Bouterse	08-MAR-17		1	5.4m	1.0	3	1	1	1	3	2	2		0	0	0	0	1	0	0	0	0	0	0	1	1	3.53	0.653704	0	0	0	0	0	0	0
Leah Bouterse	08-MAR-17		1	5.4m	1.0	3	1	1	1	3	2	2		0	0	0	0	1	0	0	0	0	0	0	1	1	3.45	0.638889	0	0	0	0	0	0	0
Leah Bouterse	08-MAR-17		1	5.4m	1.0	3	1	1	1	3	2	2		0	0	0	0	1	0	0	0	0	0	0	1	1	3.24	0.6	0	0	0	0	0	0	0
Leah Bouterse	08-MAR-17		1	5.4m	1.0	3	1	0	1	0	3	3		0	0	0	1	0	0	0	0	0	0	0	1	1	5.65	1.0463	0	0	0	1	0	4	0
Leah Bouterse	08-MAR-17		1	5.4m	1.0	5	1	2	1	1	2	2		1	0	0	0	0	2	0	0	0	0	0	2	2	4.92	0.911111	0	1	0	0	2	0	2
Leah Bouterse	08-MAR-17		1	5.4m	1.0	3	1	1	1	1	2	3		1	0	0	0	2	0	0	0	0	0	0	2	2	4.14	0.766667	0	1	0	0	2	0	2
Leah Bouterse	08-MAR-17		1	5.4m	1.0	1	1	0	1	0	3	3		1	1	1	0	0	0	0	0	0	0	1	1	2	5.13	0.95	1	0	0	1	3	4	6
Leah Bouterse	08-MAR-17		1	5.4m	1.0	3	1	1	1	0	0	3	1	1	0	1	0	1	0	0	0	0	0	0	2	2	6.11	1.13148	0	1	0	1	4	1	4
Leah Bouterse	08-MAR-17		1	5.4m	1.0	3	1	1	1	0	3	3		1	0	0	0	1	0	0	0	1	0	0	2	2	6.27	1.16111	0	1	0	1	4	4	4
Leah Bouterse	08-MAR-17		1	5.4m	1.0	3	1	1	1	0	3	3		1	0	0	0	2	0	0	0	0	0	0	2	2	5.38	0.996296	0	1	0	1	4	4	4
Leah Bouterse	08-MAR-17		1	5.4m	1.0	3	1	1	1	0	3	3		1	0	0	0	2	0	0	0	0	0	0	2	2	4.51	0.835185	0	1	0	1	4	4	4
Leah Bouterse	10-MAR-17		1	5.4m	0.0	2	0	1	1	2	2	2		0	0	0	1	0	0	0	0	0	0	1	0	1	6.01	1.11296	0	0	0	0	0	0	0
Leah Bouterse	10-MAR-17		1	5.4m	0.0	2	0	0	1	2	2	2		0	1	0	0	0	0	0	0	0	0	1	0	1	4.71	0.872222	0	0	0	0	0	0	0
Leah Bouterse	10-MAR-17		1	5.4m	0.0	2	0	1	1	2	2	2		0	0	0	1	0	0	0	0	0	0	1	0	1	4.45	0.824074	0	0	0	0	0	0	0
Leah Bouterse	10-MAR-17		1	5.4m	0.0	2	0	1	1	2	2	2		0	0	0	1	0	0	0	0	0	0	1	0	1	4.29	0.794444	0	0	0	0	0	0	0
Leah Bouterse	10-MAR-17		1	5.4m	0.0	2	0	1	1	2	2	2		0	0	0	1	0	0	0	0	0	0	1	0	1	3.84	0.711111	0	0	0	0	0	0	0
Leah Bouterse	10-MAR-17		1	5.4m	0.0	2	0	1	1	2	2	2		0	0	0	1	0	0	0	0	0	0	1	0	1	3.76	0.696296	0	0	0	0	0	0	0
Leah Bouterse	10-MAR-17		1	5.4m	0.0	2	0	1	1	2	2	2		0	0	0	1	0	0	0	0	0	0	1	0	1	3.61	0.668519	0	0	0	0	0	0	0
Leah Bouterse	10-MAR-17		1	5.4m	0.0	3	1	0	1	2	2	2		0	0	1	0	0	0	0	0	0	0	0	1	1	6.7	1.24074	0	0	0	0	0	0	0
Leah Bouterse	10-MAR-17		1	5.4m	0.0	3	1	1	1	3	2	2		0	0	0	0	1	0	0	0	0	0	0	1	1	5.64	1.04444	0	0	0	0	0	0	0
Leah Bouterse	10-MAR-17		1	5.4m	0.0	3	1	1	1	3	2	2		0	0	0	0	1	0	0	0	0	0	0	1	1	5.47	1.01296	0	0	0	0	0	0	0
Leah Bouterse	10-MAR-17		1	5.4m	0.0	3	1	1	1	3	2	2		0	0	0	0	1	0	0	0	0	0	0	1	1	5.12	0.948148	0	0	0	0	0	0	0
Leah Bouterse	10-MAR-17		1	5.4m	0.0	3	1	1	1	3	2	2		0	0	0	0	1	0	0	0	0	0	0	1	1	4.67	0.864815	0	0	0	0	0	0	0
Leah Bouterse	10-MAR-17		1	5.4m	0.0	3	1	1	1	3	2	2		0	0	0	0	1	0	0	0	0	0	0	1	1	4.45	0.824074	0	0	0	0	0	0	0
Leah Bouterse	10-MAR-17		1	5.4m	0.0	3	1	0	1	3	2	2		0	0	1	0	0	0	0	0	0	0	0	1	1	4.33	0.801852	0	0	0	0	0	0	0
Leah Bouterse	10-MAR-17		1	5.4m	0.0	3	1	1	1	3	2	2		0	0	0	0	1	0	0	0	0	0	0	1	1	4.31	0.798148	0	0	0	0	0	0	0
Leah Bouterse	10-MAR-17		1	5.4m	0.0	3	1	1	1	3	2	2		0	0	0	0	1	0	0	0	0	0	0	1	1	3.97	0.735185	0	0	0	0	0	0	0
Leah Bouterse	10-MAR-17		1	5.4m	0.0	3	1	1	1	2	2	2		0	0	0	1	0	0	0	0	0	0	0	1	1	3.9	0.722222	0	0	0	0	0	0	0
Leah Bouterse	10-MAR-17		1	5.4m	0.0	3	1	1	1	3	2	2		0	0	0	0	1	0	0	0	0	0	0	1	1	3.81	0.705556	0	0	0	0	0	0	0
Leah Bouterse	10-MAR-17		1	5.4m	0.0	3	1	1	1	3	2	2		0	0	0	0	1	0	0	0	0	0	0	1	1	3.78	0.7	0	0	0	0	0	0	0
Leah Bouterse	10-MAR-17		1	5.4m	0.0	3	1	1	1	3	2	2		0	0	0	0	1	0	0	0	0	0	0	1	1	3.46	0.640741	0	0	0	0	0	0	0
Leah Bouterse	10-MAR-17		1	5.4m	0.0	3	1	1	1	3	2	2		0	0	0	0	1	0	0	0	0	0	0	1	1	3.37	0.624074	0	0	0	0	0	0	0
Leah Bouterse	10-MAR-17		1	5.4m	1.0	3	1	1	1	2	2	1		0	0	0	0	1	0	0	0	0	0	0	1	1	3.14	0.581481	0	0	0	0	0	0	0
Leah Bouterse	10-MAR-17		1	5.4m	0.0	3	1	1	1	3	2	2		0	0	0	0	1	0	0	0	0	0	0	1	1	2.91	0.538889	0	0	0	0	0	0	0
Leah Bouterse	10-MAR-17		1	5.4m	0.0	2	0	1	1	2	2	2		1	0	0	1	1	0	0	0	0	0	1	1	2	5.33	0.987037	0	1	0	0	2	0	6
Leah Bouterse	10-MAR-17		1	5.4m	0.0	3	1	1	1	3	2	2		1	0	0	0	2	0	0	0	0	0	0	2	2	6.71	1.24259	0	1	0	0	2	0	2
Leah Bouterse	10-MAR-17		1	5.4m	0.0	3	1	1	1	3	2	2		1	0	0	0	2	0	0	0	0	0	0	2	2	6.17	1.14259	0	1	0	0	2	0	2
Leah Bouterse	10-MAR-17		1	5.4m	0.0	3	1	1	1	3	2	2		1	0	0	0	2	0	0	0	0	0	0	2	2	6.09	1.12778	0	1	0	0	2	0	2
Leah Bouterse	10-MAR-17		1	5.4m	0.0	3	1	1	1	3	2	2		1	0	0	0	2	0	0	0	0	0	0	2	2	5.37	0.994444	0	1	0	0	2	0	2
Leah Bouterse	10-MAR-17		1	5.4m	0.0	3	1	1	1	3	2	2		1	0	0	0	2	0	0	0	0	0	0	2	2	5.05	0.935185	0	1	0	0	2	0	2
Leah Bouterse	10-MAR-17		1	5.4m	0.0	3	1	1	1	3	2	2		1	0	0	0	2	0	0	0	0	0	0	2	2	4.58	0.848148	0	1	0	0	2	0	2
Leah Bouterse	10-MAR-17		1	5.4m	0.0	3	1	1	1	3	2	2		1	0	0	0	2	0	0	0	0	0	0	2	2	4.51	0.835185	0	1	0	0	2	0	2
Leah Bouterse	10-MAR-17		1	5.4m	0.0	3	1	1	1	3	2	2		1	0	0	0	2	0	0	0	0	0	0	2	2	4.3	0.796296	0	1	0	0	2	0	2
Leah Bouterse	10-MAR-17		1	5.4m	0.0	3	1	1	1	3	2	2		1	0	0	0	1	0	0	1	0	0	1	1	2	6.81	1.26111	1	0	0	1	3	2	4
Leah Bouterse	10-MAR-17		1	5.4m	0.0	1	1	1	1	3	2	2		1	1	0	0	1	0	0	0	1	0	0	2	2	5.8	1.07407	0	1	0	1	4	2	4
Leah Bouterse	10-MAR-17		1	5.4m	0.0	3	1	1	1	3	2	2		1	0	0	1	2	0	0	0	0	0	1	2	3	6.48	1.2	0	0	1	0	6	0	6
Leah Bouterse	10-MAR-17		1	5.4m	0.0	3	1	1	1	3	2	2		1	0	0	1	2	0	0	0	0	0	1	2	3	5.97	1.10556	0	0	1	0	6	0	6
Leah Bouterse	10-MAR-17		1	5.4m	0.0	3	1	1	1	3	2	2		1	0	0	2	2	0	0	0	0	0	2	2	4	7.52	1.39259	0	0	1	0	6	0	6
A. Bellville	11-MAR-17		1	5.4m	1.0	2	0	1	0					0	0	0	1	0	0	0	0	0	0	1	0	1	4.91	0.909259	0	0	0	0	0	0	0
A. Bellville	11-MAR-17		1	5.4m	3.0	2	0	1	0					0	0	0	1	0	0	0	0	0	0	1	0	1	4.65	0.861111	0	0	0	0	0	0	0
A. Bellville	11-MAR-17		1	5.4m	3.0	2	0	1	0					0	0	0	1	0	0	0	0	0	0	1	0	1	4.24	0.785185	0	0	0	0	0	0	0
A. Bellville	11-MAR-17		1	5.4m	3.0	2	0	1	0					0	0	0	1	0	0	0	0	0	0	1	0	1	4.15	0.768519	0	0	0	0	0	0	0
A. Bellville	11-MAR-17		1	5.4m	3.0	2	0	1	0					0	0	0	1	0	0	0	0	0	0	1	0	1	3.66	0.677778	0	0	0	0	0	0	0
A. Bellville	11-MAR-17		1	5.4m	3.0	3	1	1	0					0	0	0	0	1	0	0	0	0	0	0	1	1	3.91	0.724074	0	0	0	0	0	0	0
A. Bellville	11-MAR-17		1	5.4m	1.0	3	1	1	0					0	0	0	0	1	0	0	0	0	0	0	1	1	3.86	0.714815	0	0	0	0	0	0	0
A. Bellville	11-MAR-17		1	5.4m	3.0	3	1	1	0	0	1	1		0	0	0	0	1	0	0	0	0	0	0	1	1	3.95	0.731481	0	0	0	0	0	0	0
A. Bellville	11-MAR-17		1	5.4m	3.0	2	0	1	1	0	1	1		0	0	0	1	0	0	0	0	0	0	1	0	1	5.4	1	0	0	0	0	0	0	0
A. Bellville	11-MAR-17		1	5.4m	3.0	2	0	1	1	2	1	1		0	0	0	1	0	0	0	0	0	0	1	0	1	4.36	0.807407	0	0	0	0	0	0	0
A. Bellville	11-MAR-17		1	5.4m	3.0	2	0	1	1	2	2	2		0	0	0	1	0	0	0	0	0	0	1	0	1	4.98	0.922222	0	0	0	0	0	0	0
A. Bellville	11-MAR-17		1	5.4m	3.0	2	0	1	1	1	2	2		0	0	0	1	0	0	0	0	0	0	1	0	1	4.93	0.912963	0	0	0	0	0	0	0
A. Bellville	11-MAR-17		1	5.4m	1.0	2	0	1	1	1	2	2		0	0	0	1	0	0	0	0	0	0	1	0	1	3.97	0.735185	0	0	0	0	0	0	0
A. Bellville	11-MAR-17		1	5.4m	1.0	2	0	1	1	1	2	2		0	0	0	1	0	0	0	0	0	0	1	0	1	3.95	0.731481	0	0	0	0	0	0	0
A. Bellville	11-MAR-17		1	5.4m	3.0	2	0	1	1	2	2	2		0	0	0	1	0	0	0	0	0	0	1	0	1	3.75	0.694444	0	0	0	0	0	0	0
A. Bellville	11-MAR-17		1	5.4m	3.0	2	0	1	1	0	2	1		0	0	0	1	0	0	0	0	0	0	1	0	1	3.6	0.666667	0	0	0	0	0	0	0
A. Bellville	11-MAR-17		1	5.4m	3.0	2	0	1	1	2	2	2		0	0	0	1	0	0	0	0	0	0	1	0	1	3.45	0.638889	0	0	0	0	0	0	0
A. Bellville	11-MAR-17		1	5.4m	3.0	2	0	1	1	2	2	1		0	0	0	1	0	0	0	0	0	0	1	0	1	3.34	0.618519	0	0	0	0	0	0	0
A. Bellville	11-MAR-17		1	5.4m	3.0	3	1	1	1	0	2	1		0	0	0	0	1	0	0	0	0	0	0	1	1	5.4	1	0	0	0	0	0	0	0
A. Bellville	11-MAR-17		1	5.4m	1.0	3	1	1	1	0	2	2		0	0	0	0	1	0	0	0	0	0	0	1	1	5.39	0.998148	0	0	0	0	0	0	0
A. Bellville	11-MAR-17		1	5.4m	1.0	3	1	1	1	2	2	1		0	0	0	0	1	0	0	0	0	0	0	1	1	5.21	0.964815	0	0	0	0	0	0	0
A. Bellville	11-MAR-17		1	5.4m	3.0	3	1	1	1	2	2	1		0	0	0	0	1	0	0	0	0	0	0	1	1	4.78	0.885185	0	0	0	0	0	0	0
A. Bellville	11-MAR-17		1	5.4m	1.0	3	1	1	1	2	2	2		0	0	0	0	1	0	0	0	0	0	0	1	1	4.38	0.811111	0	0	0	0	0	0	0
A. Bellville	11-MAR-17		1	5.4m	3.0	3	1	1	1	2	2	1		0	0	0	0	1	0	0	0	0	0	0	1	1	4.32	0.8	0	0	0	0	0	0	0
A. Bellville	11-MAR-17		1	5.4m	3.0	3	1	1	1	2	2	2		0	0	0	0	1	0	0	0	0	0	0	1	1	4.28	0.792593	0	0	0	0	0	0	0
A. Bellville	11-MAR-17		1	5.4m	3.0	3	1	1	1	2	2	2		0	0	0	0	1	0	0	0	0	0	0	1	1	4.26	0.788889	0	0	0	0	0	0	0
A. Bellville	11-MAR-17		1	5.4m	1.0	3	1	1	1	2	2	1		0	0	0	0	1	0	0	0	0	0	0	1	1	4.25	0.787037	0	0	0	0	0	0	0
A. Bellville	11-MAR-17		1	5.4m	1.0	3	1	1	1	1	2	2		0	0	0	0	1	0	0	0	0	0	0	1	1	4.04	0.748148	0	0	0	0	0	0	0
A. Bellville	11-MAR-17		1	5.4m	1.0	3	1	1	1	1	2	2		0	0	0	0	1	0	0	0	0	0	0	1	1	3.81	0.705556	0	0	0	0	0	0	0
A. Bellville	11-MAR-17		1	5.4m	3.0	2	0	1	1	0	3	3	0	0	0	0	1	0	0	0	0	0	0	0	1	1	4.72	0.874074	0	0	0	1	0	4	0
A. Bellville	11-MAR-17		1	5.4m	1.0	2	0	1	1	0	3	3		0	0	0	1	0	0	0	0	0	0	1	0	1	4.36	0.807407	0	0	0	1	0	4	0
A. Bellville	11-MAR-17		1	5.4m	3.0	3	1	1	1	1	1	1		1	0	0	1	1	0	0	0	0	0	1	1	2	5.22	0.966667	1	0	0	0	1	0	6
A. Bellville	11-MAR-17		1	5.4m	3.0	2	0	1	0					1	0	0	1	1	0	0	0	0	0	1	1	2	4.91	0.909259	0	1	0	0	2	0	6
A. Bellville	11-MAR-17		1	5.4m	1.0	3	1	1	1	2	2	1		1	0	0	0	2	0	0	0	0	0	0	2	2	5.81	1.07593	0	1	0	0	2	0	2
A. Bellville	11-MAR-17		1	5.4m	3.0	2	0	1	0					1	0	0	2	0	0	0	1	0	0	2	0	2	5.72	1.05926	1	0	0	1	3	3	3
A. Bellville	15-MAR-17		1	5.4m	3.0	2	0	1	0					0	0	0	1	0	0	0	0	0	0	1	0	1	6.36	1.17778	0	0	0	0	0	0	0
A. Bellville	15-MAR-17		1	5.4m	1.0	2	0	1	0					0	0	0	1	0	0	0	0	0	0	1	0	1	5.47	1.01296	0	0	0	0	0	0	0
A. Bellville	15-MAR-17		1	5.4m	1.0	2	0	1	0					0	0	0	1	0	0	0	0	0	0	1	0	1	4.51	0.835185	0	0	0	0	0	0	0
A. Bellville	15-MAR-17		1	5.4m	1.0	2	0	1	0					0	0	0	1	0	0	0	0	0	0	1	0	1	3.93	0.727778	0	0	0	0	0	0	0
A. Bellville	15-MAR-17		1	5.4m	3.0	2	0	1	0					0	0	0	1	0	0	0	0	0	0	1	0	1	3.59	0.664815	0	0	0	0	0	0	0
A. Bellville	15-MAR-17		1	5.4m	3.0	3	1	1	0					0	0	0	0	1	0	0	0	0	0	0	1	1	6.27	1.16111	0	0	0	0	0	0	0
A. Bellville	15-MAR-17		1	5.4m	1.0	3	1	1	0					0	0	0	0	1	0	0	0	0	0	0	1	1	4.96	0.918519	0	0	0	0	0	0	0
A. Bellville	15-MAR-17		1	5.4m	1.0	3	1	1	0					0	0	0	0	1	0	0	0	0	0	0	1	1	4.38	0.811111	0	0	0	0	0	0	0
A. Bellville	15-MAR-17		1	5.4m	3.0	2	0	1	1	2	0	2	0	0	0	0	2	0	0	0	0	0	0	1	0	1	5.31	0.983333	0	0	0	1	0	1	0
A. Bellville	15-MAR-17		1	5.4m	1.0	2	0	1	1	0	0	2	0	0	0	0	2	0	0	0	0	0	0	1	0	1	5.16	0.955556	0	0	0	1	0	1	0
A. Bellville	15-MAR-17		1	5.4m	3.0	3	1	1	1	0	0	2	0	0	0	0	0	3	0	0	0	0	0	0	1	1	5.88	1.08889	0	0	0	1	0	1	0
A. Bellville	15-MAR-17		1	5.4m	3.0	3	1	1	1	0	0	2	0	0	0	0	0	3	0	0	0	0	0	0	1	1	5.8	1.07407	0	0	0	1	0	1	0
A. Bellville	15-MAR-17		1	5.4m	1.0	2	0	1	1	2	2	2		0	0	0	1	0	0	0	0	0	0	1	0	1	8.4	1.55556	0	0	0	0	0	0	0
A. Bellville	15-MAR-17		1	5.4m	3.0	2	0	1	1	2	2	3		0	0	0	1	0	0	0	0	0	0	1	0	1	6.26	1.15926	0	0	0	0	0	0	0
A. Bellville	15-MAR-17		1	5.4m	3.0	2	0	1	1	0	2	1		0	0	0	1	0	0	0	0	0	0	1	0	1	6.22	1.15185	0	0	0	0	0	0	0
A. Bellville	15-MAR-17		1	5.4m	1.0	2	0	1	1	1	2	2		0	0	0	1	0	0	0	0	0	0	1	0	1	5.35	0.990741	0	0	0	0	0	0	0
A. Bellville	15-MAR-17		1	5.4m	3.0	2	0	1	1	1	2	2		0	0	0	1	0	0	0	0	0	0	1	0	1	4.8	0.888889	0	0	0	0	0	0	0
A. Bellville	15-MAR-17		1	5.4m	1.0	2	0	1	1	0	2	1		0	0	0	1	0	0	0	0	0	0	1	0	1	4.76	0.881481	0	0	0	0	0	0	0
A. Bellville	15-MAR-17		1	5.4m	1.0	2	0	1	1	0	2	1		0	0	0	1	0	0	0	0	0	0	1	0	1	4.75	0.87963	0	0	0	0	0	0	0
A. Bellville	15-MAR-17		1	5.4m	3.0	2	0	1	1	1	2	2		0	0	0	1	0	0	0	0	0	0	1	0	1	4.63	0.857407	0	0	0	0	0	0	0
A. Bellville	15-MAR-17		1	5.4m	1.0	2	0	1	1	1	2	2		0	0	0	1	0	0	0	0	0	0	1	0	1	3.9	0.722222	0	0	0	0	0	0	0
A. Bellville	15-MAR-17		1	5.4m	1.0	2	0	1	1	1	2	2		0	0	0	1	0	0	0	0	0	0	1	0	1	3.7	0.685185	0	0	0	0	0	0	0
A. Bellville	15-MAR-17		1	5.4m	3.0	3	1	1	1	2	2	2		0	0	0	0	1	0	0	0	0	0	0	1	1	6.07	1.12407	0	0	0	0	0	0	0
A. Bellville	15-MAR-17		1	5.4m	1.0	3	1	1	1	2	2			0	0	0	0	1	0	0	0	0	0	0	1	1	5.65	1.0463	0	0	0	0	0	0	0
A. Bellville	15-MAR-17		1	5.4m	3.0	3	1	1	1	2	2	2		0	0	0	0	1	0	0	0	0	0	0	1	1	5.55	1.02778	0	0	0	0	0	0	0
A. Bellville	15-MAR-17		1	5.4m	1.0	3	1	1	1	2	2	2		0	0	0	0	1	0	0	0	0	0	0	1	1	5.45	1.00926	0	0	0	0	0	0	0
A. Bellville	15-MAR-17		1	5.4m	3.0	3	1	1	1	2	2	2		0	0	0	0	1	0	0	0	0	0	0	1	1	5.26	0.974074	0	0	0	0	0	0	0
A. Bellville	15-MAR-17		1	5.4m	3.0	3	1	1	1	2	2	1		0	0	0	0	1	0	0	0	0	0	0	1	1	5.13	0.95	0	0	0	0	0	0	0
A. Bellville	15-MAR-17		1	5.4m	3.0	3	1	1	1	0	2	1		0	0	0	0	1	0	0	0	0	0	0	1	1	5.12	0.948148	0	0	0	0	0	0	0
A. Bellville	15-MAR-17		1	5.4m	1.0	3	1	1	1	1	2	2		0	0	0	0	1	0	0	0	0	0	0	1	1	5.11	0.946296	0	0	0	0	0	0	0
A. Bellville	15-MAR-17		1	5.4m	3.0	3	1	1	1	2	2	2		0	0	0	0	1	0	0	0	0	0	0	1	1	4.95	0.916667	0	0	0	0	0	0	0
A. Bellville	15-MAR-17		1	5.4m	3.0	3	1	1	1	1	2	2		0	0	0	0	1	0	0	0	0	0	0	1	1	4.83	0.894444	0	0	0	0	0	0	0
A. Bellville	15-MAR-17		1	5.4m	1.0	3	1	1	1	1	2	2		0	0	0	0	1	0	0	0	0	0	0	1	1	4.8	0.888889	0	0	0	0	0	0	0
A. Bellville	15-MAR-17		1	5.4m	1.0	3	1	1	1	1	2	2		0	0	0	0	1	0	0	0	0	0	0	1	1	4.58	0.848148	0	0	0	0	0	0	0
A. Bellville	15-MAR-17		1	5.4m	3.0	3	1	1	1	2	2	2		0	0	0	0	1	0	0	0	0	0	0	1	1	4.56	0.844444	0	0	0	0	0	0	0
A. Bellville	15-MAR-17		1	5.4m	3.0	3	1	1	1	0	2	1		0	0	0	0	1	0	0	0	0	0	0	1	1	4.53	0.838889	0	0	0	0	0	0	0
A. Bellville	15-MAR-17		1	5.4m	3.0	3	1	1	1	0	2	1		0	0	0	0	1	0	0	0	0	0	0	1	1	4.53	0.838889	0	0	0	0	0	0	0
A. Bellville	15-MAR-17		1	5.4m	3.0	3	1	1	1	2	2	2		0	0	0	0	1	0	0	0	0	0	0	1	1	4.51	0.835185	0	0	0	0	0	0	0
A. Bellville	15-MAR-17		1	5.4m	3.0	3	1	1	1	2	2	2		0	0	0	0	1	0	0	0	0	0	0	1	1	4.51	0.835185	0	0	0	0	0	0	0
A. Bellville	15-MAR-17		1	5.4m	3.0	3	1	1	1	0	2	1		0	0	0	0	1	0	0	0	0	0	0	1	1	4.42	0.818519	0	0	0	0	0	0	0
A. Bellville	15-MAR-17		1	5.4m	3.0	3	1	1	1	2	2	2		0	0	0	0	1	0	0	0	0	0	0	1	1	4.39	0.812963	0	0	0	0	0	0	0
A. Bellville	15-MAR-17		1	5.4m	3.0	3	1	1	1	0	2	1		0	0	0	0	1	0	0	0	0	0	0	1	1	4.22	0.781481	0	0	0	0	0	0	0
A. Bellville	15-MAR-17		1	5.4m	1.0	3	1	1	1	2	2	2		0	0	0	0	1	0	0	0	0	0	0	1	1	4.17	0.772222	0	0	0	0	0	0	0
A. Bellville	15-MAR-17		1	5.4m	3.0	3	1	1	1	2	2	2		0	0	0	0	1	0	0	0	0	0	0	1	1	3.99	0.738889	0	0	0	0	0	0	0
A. Bellville	15-MAR-17		1	5.4m	3.0	3	1	1	1	1	2	2		0	0	0	0	1	0	0	0	0	0	0	1	1	3.99	0.738889	0	0	0	0	0	0	0
A. Bellville	15-MAR-17		1	5.4m	1.0	3	1	1	1	1	2	2		0	0	0	0	1	0	0	0	0	0	0	1	1	3.96	0.733333	0	0	0	0	0	0	0
A. Bellville	15-MAR-17		1	5.4m	3.0	5	1	2	1	1	2	2		0	0	0	0	0	1	0	0	0	0	0	1	1	3.78	0.7	0	0	0	0	0	0	0
A. Bellville	15-MAR-17		1	5.4m	3.0	5	1	2	1	1	2	2		0	0	0	0	0	1	0	0	0	0	0	1	1	3.78	0.7	0	0	0	0	0	0	0
A. Bellville	15-MAR-17		1	5.4m	3.0	3	1	1	1	2	2	1		0	0	0	0	1	0	0	0	0	0	0	1	1	3.45	0.638889	0	0	0	0	0	0	0
A. Bellville	15-MAR-17		1	5.4m	3.0	3	1	1	1	0	3	3	0	0	0	0	0	1	0	0	0	0	0	0	1	1	4.54	0.840741	0	0	0	1	0	4	0
A. Bellville	15-MAR-17		1	5.4m	1.0	3	1	1	1	2	2	2	0	1	0	0	1	0	0	0	0	0	0	1	1	2	6.28	1.16296	1	0	0	0	1	0	6
A. Bellville	15-MAR-17		1	5.4m	1.0	3	1	1	0					1	0	0	0	2	0	0	0	0	0	0	2	2	5.71	1.05741	0	1	0	0	2	0	2
A. Bellville	15-MAR-17		1	5.4m	3.0	3	1	1	1	2	2	2		1	0	0	0	1	0	0	1	0	0	1	1	2	5.87	1.08704	1	0	0	1	3	2	4
A. Bellville	15-MAR-17		1	5.4m	3.0	3	1	1	1	2	2	2		1	0	0	0	1	0	0	1	0	0	1	1	2	5.87	1.08704	1	0	0	1	3	2	4
A. Bellville	15-MAR-17		1	5.4m	3.0	2	0	1	1	1	2	2		1	0	0	0	1	0	0	0	1	0	1	1	2	3.91	0.724074	0	1	0	1	4	2	5
A. Bellville	15-MAR-17		1	5.4m	3.0	7	0	3	1	1	2	2		1	0	0	0	0	0	0	1	1	0	1	1	2	3.91	0.724074	0	1	0	1	4	2	7
A. Bellville	15-MAR-17		1	5.4m	1.0	3	1	1	1	2	2	2		1	0	0	1	0	0	0	0	1	0	0	2	2	7.51	1.39074	0	1	0	1	4	2	4
A. Bellville	15-MAR-17		1	5.4m	3.0	3	1	1	1	2	2	2		1	0	0	0	1	0	0	0	1	0	0	2	2	6.07	1.12407	0	1	0	1	4	2	4
A. Bellville	15-MAR-17		1	5.4m	1.0	3	1	1	1	0	3	2	0	1	0	0	0	1	0	0	0	0	1	0	1	1	6.08	1.12593	0	0	0	1	10	4	4
A. Bellville	18-MAR-17		1	5.4m	3.0	2	0	1	0					0	0	0	1	0	0	0	0	0	0	1	0	1	5.13	0.95	0	0	0	0	0	0	0
A. Bellville	18-MAR-17		1	5.4m	3.0	2	0	1	0					0	0	0	1	0	0	0	0	0	0	1	0	1	4.33	0.801852	0	0	0	0	0	0	0
A. Bellville	18-MAR-17		1	5.4m	3.0	2	0	1	0					0	0	0	1	0	0	0	0	0	0	1	0	1	4.11	0.761111	0	0	0	0	0	0	0
A. Bellville	18-MAR-17		1	5.4m	3.0	2	0	1	0					0	0	0	1	0	0	0	0	0	0	1	0	1	3.6	0.666667	0	0	0	0	0	0	0
A. Bellville	18-MAR-17		1	5.4m	2.0	3	1	1	0					0	0	0	0	1	0	0	0	0	0	0	1	1	6.53	1.20926	0	0	0	0	0	0	0
A. Bellville	18-MAR-17		1	5.4m	3.0	3	1	1	0					0	0	0	0	1	0	0	0	0	0	0	1	1	5.5	1.01852	0	0	0	0	0	0	0
A. Bellville	18-MAR-17		1	5.4m	3.0	3	1	1	0					0	0	0	0	1	0	0	0	0	0	0	1	1	4.25	0.787037	0	0	0	0	0	0	0
A. Bellville	18-MAR-17		1	5.4m	2.0	3	1	1	0					0	0	0	0	1	0	0	0	1	0	0	2	2	4.79	0.887037	0	1	0	1	0	3	0
A. Bellville	18-MAR-17		1	5.4m	2.0	3	1	1	1	0	1	1		0	0	0	0	1	0	0	0	0	0	0	1	1	5.29	0.97963	0	0	0	0	0	0	0
A. Bellville	18-MAR-17		1	5.4m	3.0	3	1	1	1	0	1	1		0	0	0	0	1	0	0	0	0	0	0	1	1	5.2	0.962963	0	0	0	0	0	0	0
A. Bellville	18-MAR-17		1	5.4m	3.0	3	1	1	1	0	1	1		0	0	0	0	1	0	0	0	0	0	0	1	1	4.9	0.907407	0	0	0	0	0	0	0
A. Bellville	18-MAR-17		1	5.4m	2.0	2	0	1	1	0	2	1		0	0	0	1	0	0	0	0	0	0	1	0	1	5.71	1.05741	0	0	0	0	0	0	0
A. Bellville	18-MAR-17		1	5.4m	2.0	2	0	1	1	2	2	2		0	0	0	1	0	0	0	0	0	0	1	0	1	5.66	1.04815	0	0	0	0	0	0	0
A. Bellville	18-MAR-17		1	5.4m	2.0	2	0	1	1	1	2	2		0	0	0	1	0	0	0	0	0	0	1	0	1	4.8	0.888889	0	0	0	0	0	0	0
A. Bellville	18-MAR-17		1	5.4m	3.0	2	0	1	1	1	2	2		0	0	0	1	0	0	0	0	0	0	1	0	1	4.79	0.887037	0	0	0	0	0	0	0
A. Bellville	18-MAR-17		1	5.4m	3.0	2	0	1	1	2	2	2		0	0	0	1	0	0	0	0	0	0	1	0	1	4.39	0.812963	0	0	0	0	0	0	0
A. Bellville	18-MAR-17		1	5.4m	3.0	2	0	1	1	1	2	2		0	0	0	1	0	0	0	0	0	0	1	0	1	4.34	0.803704	0	0	0	0	0	0	0
A. Bellville	18-MAR-17		1	5.4m	2.0	2	0	1	1	2	2	2		0	0	0	1	0	0	0	0	0	0	1	0	1	4.22	0.781481	0	0	0	0	0	0	0
A. Bellville	18-MAR-17		1	5.4m	3.0	2	0	1	1	1	2	2		0	0	0	1	0	0	0	0	0	0	1	0	1	4.13	0.764815	0	0	0	0	0	0	0
A. Bellville	18-MAR-17		1	5.4m	3.0	2	0	1	1	1	2	2		0	0	0	1	0	0	0	0	0	0	1	0	1	3.77	0.698148	0	0	0	0	0	0	0
A. Bellville	18-MAR-17		1	5.4m	2.0	3	1	1	1	2	2	2		0	0	0	0	1	0	0	0	0	0	0	1	1	5.85	1.08333	0	0	0	0	0	0	0
A. Bellville	18-MAR-17		1	5.4m	2.0	3	1	1	1	2	2	2		0	0	0	0	1	0	0	0	0	0	0	1	1	4.91	0.909259	0	0	0	0	0	0	0
A. Bellville	18-MAR-17		1	5.4m	3.0	3	1	1	1	2	2	2		0	0	0	0	1	0	0	0	0	0	0	1	1	4.45	0.824074	0	0	0	0	0	0	0
A. Bellville	18-MAR-17		1	5.4m	3.0	3	1	1	1	2	2	2		0	0	0	0	1	0	0	0	0	0	0	1	1	4.36	0.807407	0	0	0	0	0	0	0
A. Bellville	18-MAR-17		1	5.4m	3.0	3	1	1	1	2	2	1		0	0	0	0	1	0	0	0	0	0	0	1	1	4.33	0.801852	0	0	0	0	0	0	0
A. Bellville	18-MAR-17		1	5.4m	3.0	3	1	1	1	2	2	2		0	0	0	0	1	0	0	0	0	0	0	1	1	4.2	0.777778	0	0	0	0	0	0	0
A. Bellville	18-MAR-17		1	5.4m	2.0	3	1	1	1	2	2	2		0	0	0	0	1	0	0	0	0	0	0	1	1	4.2	0.777778	0	0	0	0	0	0	0
A. Bellville	18-MAR-17		1	5.4m	3.0	3	1	1	1	1	2	2		0	0	0	0	1	0	0	0	0	0	0	1	1	4.2	0.777778	0	0	0	0	0	0	0
A. Bellville	18-MAR-17		1	5.4m	3.0	3	1	1	1	2	2	1		0	0	0	0	1	0	0	0	0	0	0	1	1	4.1	0.759259	0	0	0	0	0	0	0
A. Bellville	18-MAR-17		1	5.4m	3.0	3	1	1	1	2	2	1		0	0	0	0	1	0	0	0	0	0	0	1	1	4	0.740741	0	0	0	0	0	0	0
A. Bellville	18-MAR-17		1	5.4m	3.0	3	1	1	1	2	2	1		0	0	0	0	1	0	0	0	0	0	0	1	1	3.92	0.725926	0	0	0	0	0	0	0
A. Bellville	18-MAR-17		1	5.4m	3.0	3	1	1	1	2	2	2		0	0	0	0	1	0	0	0	0	0	0	1	1	3.73	0.690741	0	0	0	0	0	0	0
A. Bellville	18-MAR-17		1	5.4m	2.0	2	0	1	1	0	3	2	0	0	0	0	1	0	0	0	0	0	0	1	0	1	6.09	1.12778	0	0	0	1	0	4	0
A. Bellville	18-MAR-17		1	5.4m	2.0	2	0	1	0					1	0	0	2	0	0	0	0	0	0	2	0	2	7.79	1.44259	1	0	0	0	1	0	1
A. Bellville	18-MAR-17		1	5.4m	3.0	2	0	1	0					1	0	0	2	0	0	0	0	0	0	2	0	2	5.18	0.959259	1	0	0	0	1	0	1
A. Bellville	18-MAR-17		1	5.4m	2.0	3	1	1	0					1	0	0	1	1	0	0	0	0	0	1	1	2	4.73	0.875926	1	0	0	0	1	0	6
A. Bellville	18-MAR-17		1	5.4m	2.0	2	0	1	1	1	2	2		1	0	0	2	0	0	0	0	0	0	2	0	2	5.57	1.03148	1	0	0	0	1	0	1
A. Bellville	18-MAR-17		1	5.4m	2.0	2	0	1	1	2	2	1		1	0	0	2	0	0	0	0	0	0	2	0	2	4.76	0.881481	1	0	0	0	1	0	1
A. Bellville	18-MAR-17		1	5.4m	3.0	2	0	1	0					1	0	0	1	1	0	0	0	0	0	1	1	2	4.83	0.894444	0	1	0	0	2	0	6
A. Bellville	18-MAR-17		1	5.4m	3.0	2	0	1	0					1	0	0	1	1	0	0	0	0	0	1	1	2	4.28	0.792593	0	1	0	0	2	0	6
A. Bellville	18-MAR-17		1	5.4m	3.0	3	1	1	1	2	2	1		1	0	0	1	1	0	0	0	0	0	0	2	2	3.97	0.735185	0	1	0	0	2	0	2
A. Bellville	18-MAR-17		1	5.4m	2.0	3	1	1	1	2	2	2		1	0	0	0	2	0	0	0	0	0	0	2	2	4.81	0.890741	0	1	0	0	2	0	2
A. Bellville	18-MAR-17		1	5.4m	2.0	3	1	1	1	2	2	2		1	0	0	0	1	0	0	0	1	0	0	2	2	4.31	0.798148	0	1	0	1	4	2	4
A. Bellville	18-MAR-17		1	5.4m	2.0	3	1	1	0					1	0	0	1	0	0	0	1	1	1	1	2	3	4.8	0.888889	0	0	1	1	5	3	5
A. Bellville	18-MAR-17		1	5.4m	3.0	3	1	1	1	0	3	3		1	0	0	1	2	0	0	0	0	0	1	2	3	6.09	1.12778	0	0	1	1	5	4	5
A. Bellville	18-MAR-17		1	5.4m	3.0	3	1	1	0					1	0	0	1	2	0	0	0	0	0	1	2	3	5.16	0.955556	0	0	1	0	6	0	6
A. Bellville	18-MAR-17		1	5.4m	3.0	3	1	1	1	2	1	1		1	0	0	1	2	0	0	0	0	0	1	2	3	5.26	0.974074	0	0	1	0	6	0	6
A. Bellville	18-MAR-17		1	5.4m	3.0	2	0	1	1	1	2	2		1	0	0	2	1	0	0	0	0	0	2	1	3	6.34	1.17407	0	0	1	0	6	0	6
A. Bellville	19-MAR-17		1	5.4m	0.0	2	0	1	0					0	0	0	1	0	0	0	0	0	0	1	0	1	5.3	0.981481	0	0	0	0	0	0	0
A. Bellville	19-MAR-17		1	5.4m	0.0	2	0	1	0					0	0	0	1	0	0	0	0	0	0	1	0	1	4.73	0.875926	0	0	0	0	0	0	0
A. Bellville	19-MAR-17		1	5.4m	0.0	2	0	1	0					0	0	0	1	0	0	0	0	0	0	1	0	1	4.35	0.805556	0	0	0	0	0	0	0
A. Bellville	19-MAR-17		1	5.4m	0.0	2	0	1	0					0	0	0	1	0	0	0	0	0	0	1	0	1	4.21	0.77963	0	0	0	0	0	0	0
A. Bellville	19-MAR-17		1	5.4m	0.0	2	0	1	0					0	0	0	1	0	0	0	0	0	0	1	0	1	3.93	0.727778	0	0	0	0	0	0	0
A. Bellville	19-MAR-17		1	5.4m	0.0	2	0	1	0					0	0	0	1	0	0	0	0	0	0	1	0	1	3.85	0.712963	0	0	0	0	0	0	0
A. Bellville	19-MAR-17		1	5.4m	0.0	3	1	1	0					0	0	0	0	1	0	0	0	0	0	0	1	1	4.07	0.753704	0	0	0	0	0	0	0
A. Bellville	19-MAR-17		1	5.4m	0.0	2	0	1	1	2	2	2		0	0	0	0	1	0	0	0	0	0	1	0	1	5.49	1.01667	0	0	0	0	0	0	0
A. Bellville	19-MAR-17		1	5.4m	0.0	2	0	1	1	1	2	2		0	0	0	0	1	0	0	0	0	0	1	0	1	4.51	0.835185	0	0	0	0	0	0	0
A. Bellville	19-MAR-17		1	5.4m	0.0	3	1	1	1	2	2	1		0	0	0	0	1	0	0	0	0	0	0	1	1	5.64	1.04444	0	0	0	0	0	0	0
A. Bellville	19-MAR-17		1	5.4m	0.0	3	1	1	1	1	2	2		0	0	0	1	0	0	0	0	0	0	0	1	1	5.31	0.983333	0	0	0	0	0	0	0
A. Bellville	19-MAR-17		1	5.4m	0.0	3	1	1	1	1	2	2		0	0	0	0	1	0	0	0	0	0	0	1	1	4.89	0.905556	0	0	0	0	0	0	0
A. Bellville	19-MAR-17		1	5.4m	0.0	3	1	1	1	2	2	2		0	0	0	0	1	0	0	0	0	0	0	1	1	4.83	0.894444	0	0	0	0	0	0	0
A. Bellville	19-MAR-17		1	5.4m	0.0	3	1	1	1	2	2	1		0	0	0	1	0	0	0	0	0	0	0	1	1	4.74	0.877778	0	0	0	0	0	0	0
A. Bellville	19-MAR-17		1	5.4m	0.0	3	1	1	1	2	2	2		0	0	0	0	1	0	0	0	0	0	0	1	1	4.54	0.840741	0	0	0	0	0	0	0
A. Bellville	19-MAR-17		1	5.4m	0.0	3	1	1	1	2	2	2		0	0	0	0	1	0	0	0	0	0	0	1	1	4.5	0.833333	0	0	0	0	0	0	0
A. Bellville	19-MAR-17		1	5.4m	0.0	3	1	1	1	1	2	2		0	0	0	0	1	0	0	0	0	0	0	1	1	3.99	0.738889	0	0	0	0	0	0	0
A. Bellville	19-MAR-17		1	5.4m	0.0	3	1	1	1	2	2	2		0	0	0	0	1	0	0	0	0	0	0	1	1	3.87	0.716667	0	0	0	0	0	0	0
A. Bellville	19-MAR-17		1	5.4m	0.0	3	1	1	1	1	2	2		0	0	0	0	1	0	0	0	0	0	0	1	1	3.7	0.685185	0	0	0	0	0	0	0
A. Bellville	19-MAR-17		1	5.4m	0.0	3	1	1	1	1	2	2		0	0	0	0	1	0	0	0	0	0	0	1	1	3.51	0.65	0	0	0	0	0	0	0
A. Bellville	19-MAR-17		1	5.4m	0.0	2	0	1	0					1	0	0	2	0	0	0	0	0	0	2	0	2	5.31	0.983333	1	0	0	0	1	0	1
A. Bellville	19-MAR-17		1	5.4m	0.0	2	0	1	0					1	0	0	2	0	0	0	0	0	0	2	0	2	4.78	0.885185	1	0	0	0	1	0	1
A. Bellville	19-MAR-17		1	5.4m	0.0	3	1	1	0					1	0	0	1	1	0	0	0	0	0	1	1	2	5.96	1.1037	1	0	0	0	1	0	6
A. Bellville	19-MAR-17		1	5.4m	0.0	3	1	1	0					1	0	0	1	1	0	0	0	0	0	1	1	2	5.88	1.08889	1	0	0	0	1	0	6
A. Bellville	19-MAR-17		1	5.4m	0.0	3	1	1	1	0	1	1		1	0	0	1	1	0	0	0	0	0	1	1	2	7.83	1.45	1	0	0	0	1	0	6
A. Bellville	19-MAR-17		1	5.4m	0.0	3	1	1	1	1	2	2		1	0	0	1	2	0	0	0	0	0	1	1	2	6.08	1.12593	1	0	0	0	1	0	6
A. Bellville	19-MAR-17		1	5.4m	0.0	3	1	1	1	2	2	2		1	0	0	0	1	0	0	0	0	0	1	1	2	4.2	0.777778	1	0	0	0	1	0	6
A. Bellville	19-MAR-17		1	5.4m	0.0	3	1	1	1	2	2	2		1	0	0	1	1	0	0	0	0	0	1	1	2	3.31	0.612963	1	0	0	0	1	0	6
A. Bellville	19-MAR-17		1	5.4m	0.0	2	0	1	0					1	0	0	1	1	0	0	0	0	0	1	1	2	6.12	1.13333	0	1	0	0	2	0	6
A. Bellville	19-MAR-17		1	5.4m	0.0	2	0	1	0					1	0	0	1	1	0	0	0	0	0	1	1	2	4.8	0.888889	0	1	0	0	2	0	6
A. Bellville	19-MAR-17		1	5.4m	0.0	2	0	1	0					1	0	0	1	1	0	0	0	0	0	1	1	2	4.33	0.801852	0	1	0	0	2	0	6
A. Bellville	19-MAR-17		1	5.4m	0.0	2	0	1	0					1	0	0	1	1	0	0	0	0	0	1	1	2	3.87	0.716667	0	1	0	0	2	0	6
A. Bellville	19-MAR-17		1	5.4m	0.0	3	1	1	0					1	0	0	0	2	0	0	0	0	0	0	2	2	5.72	1.05926	0	1	0	0	2	0	2
A. Bellville	19-MAR-17		1	5.4m	0.0	3	1	1	1	1	2	2		1	0	0	0	3	0	0	0	0	0	0	3	3	5.83	1.07963	0	1	0	0	2	0	2
A. Bellville	19-MAR-17		1	5.4m	0.0	3	1	1	1	2	2	2		1	0	0	0	1	0	0	0	0	0	0	2	2	5.18	0.959259	0	1	0	0	2	0	2
A. Bellville	19-MAR-17		1	5.4m	0.0	3	1	1	1	1	2	2		1	0	0	0	2	0	0	0	0	0	0	2	2	5.04	0.933333	0	1	0	0	2	0	2
A. Bellville	19-MAR-17		1	5.4m	0.0	3	1	1	1	2	2	2		1	0	0	0	2	0	0	0	0	0	0	2	2	5.02	0.92963	0	1	0	0	2	0	2
A. Bellville	19-MAR-17		1	5.4m	0.0	3	1	1	1	1	2	1		1	0	0	0	2	0	0	0	0	0	0	2	2	4.8	0.888889	0	1	0	0	2	0	2
A. Bellville	19-MAR-17		1	5.4m	0.0	3	1	1	1	2	2	2		1	0	0	1	1	0	0	1	0	0	2	1	3	5.63	1.04259	1	0	0	1	3	2	5
A. Bellville	19-MAR-17		1	5.4m	0.0	2	0	1	0					1	0	0	1	0	0	0	0	1	0	1	1	2	6.83	1.26481	0	1	0	1	4	3	3
A. Bellville	19-MAR-17		1	5.4m	0.0	2	0	1	1	0	0	2	1	1	0	0	1	1	0	0	0	0	0	1	1	2	6.9	1.27778	0	1	0	1	4	1	5
A. Bellville	19-MAR-17		1	5.4m	0.0	2	0	1	0					1	0	0	1	1	0	0	1	1	0	2	2	4	6.39	1.18333	0	0	1	1	5	3	5
A. Bellville	19-MAR-17		1	5.4m	0.0	3	1	1	1	0	1	1		1	0	0	1	1	0	0	1	1	0	2	2	4	7.34	1.35926	0	0	1	1	5	2	5
A. Bellville	19-MAR-17		1	5.4m	0.0	3	1	1	1	2	2	1		1	0	0	1	1	0	0	0	0	0	1	2	3	7.17	1.32778	0	0	1	0	6	0	6
A. Bellville	19-MAR-17		1	5.4m	0.0	3	1	1	1	1	2	1		1	0	0	2	2	0	0	0	0	0	2	2	4	8.98	1.66296	0	0	1	0	6	0	6
A. Bellville	19-MAR-17		1	5.4m	0.0	3	1	1	1	2	2	2		1	0	0	2	2	0	0	0	0	0	2	2	4	6.24	1.15556	0	0	1	0	6	0	6
A. Bellville	21-MAR-17		1	5.4m	1.0	2	0	1	0					0	0	0	1	0	0	0	0	0	0	1	0	1	5.68	1.05185	0	0	0	0	0	0	0
A. Bellville	21-MAR-17		1	5.4m	1.0	2	0	1	0					0	0	0	1	0	0	0	0	0	0	1	0	1	5.49	1.01667	0	0	0	0	0	0	0
A. Bellville	21-MAR-17		1	5.4m	1.0	2	0	1	0					0	0	0	1	0	0	0	0	0	0	1	0	1	5.41	1.00185	0	0	0	0	0	0	0
A. Bellville	21-MAR-17		1	5.4m	0.0	2	0	1	0					0	0	0	1	0	0	0	0	0	0	1	0	1	5.04	0.933333	0	0	0	0	0	0	0
A. Bellville	21-MAR-17		1	5.4m	1.0	2	0	1	0					0	0	0	1	0	0	0	0	0	0	1	0	1	4.8	0.888889	0	0	0	0	0	0	0
A. Bellville	21-MAR-17		1	5.4m	1.0	2	0	1	0				0	0	0	0	1	0	0	0	0	0	0	1	0	1	4.26	0.788889	0	0	0	0	0	0	0
A. Bellville	21-MAR-17		1	5.4m	1.0	2	0	1	0					0	0	0	1	0	0	0	0	0	0	1	0	1	4.08	0.755556	0	0	0	0	0	0	0
A. Bellville	21-MAR-17		1	5.4m	1.0	2	0	1	0					0	0	0	1	0	0	0	0	0	0	1	0	1	4	0.740741	0	0	0	0	0	0	0
A. Bellville	21-MAR-17		1	5.4m	1.0	2	0	1	0					0	0	0	1	0	0	0	0	0	0	1	0	1	3.78	0.7	0	0	0	0	0	0	0
A. Bellville	21-MAR-17		1	5.4m	1.0	2	0	1	0					0	0	0	1	0	0	0	0	0	0	1	0	1	3.7	0.685185	0	0	0	0	0	0	0
A. Bellville	21-MAR-17		1	5.4m	1.0	2	0	1	0					0	0	0	1	0	0	0	0	0	0	1	0	1	3.63	0.672222	0	0	0	0	0	0	0
A. Bellville	21-MAR-17		1	5.4m	1.0	2	0	1	0					0	0	0	1	0	0	0	0	0	0	1	0	1	3.4	0.62963	0	0	0	0	0	0	0
A. Bellville	21-MAR-17		1	5.4m	1.0	3	1	1	0					0	0	0	0	0	0	0	0	0	1	0	1	1	6.61	1.22407	0	0	0	0	0	0	0
A. Bellville	21-MAR-17		1	5.4m	0.0	3	1	1	0					0	0	0		1	0	0	0	0	0	0	1	1	5.75	1.06481	0	0	0	0	0	0	0
A. Bellville	21-MAR-17		1	5.4m	1.0	3	1	1	0					0	0	0	0	1	0	0	0	0	0	0	1	1	4.65	0.861111	0	0	0	0	0	0	0
A. Bellville	21-MAR-17		1	5.4m	1.0	3	1	1	0					0	0	0	0	1	0	0	0	0	0	0	1	1	4.58	0.848148	0	0	0	0	0	0	0
A. Bellville	21-MAR-17		1	5.4m	1.0	5	1	2	0					0	0	0	0	0	1	0	0	0	0	0	1	1	4.26	0.788889	0	0	0	0	0	0	0
A. Bellville	21-MAR-17		1	5.4m	1.0	3	1	1	0					0	0	0	0	1	0	0	0	0	0	0	1	1	4.16	0.77037	0	0	0	0	0	0	0
A. Bellville	21-MAR-17		1	5.4m	1.0	3	1	1	1	0	0	1	0	0	0	0	0	1	0	0	0	0	0	0	1	1	6.53	1.20926	0	0	0	1	0	1	0
A. Bellville	21-MAR-17		1	5.4m	1.0	3	1	1	1	0	0	2	0	0	0	0	0	3	0	0	0	0	0	0	1	1	5.73	1.06111	0	0	0	1	0	1	0
A. Bellville	21-MAR-17		1	5.4m	1.0	2	0	1	1	0	1	1		0	0	0	1	0	0	0	0	0	0	1	0	1	5.03	0.931481	0	0	0	0	0	0	0
A. Bellville	21-MAR-17		1	5.4m	1.0	2	0	1	1	2	1	1		0	0	0	1	0	0	0	0	0	0	1	0	1	4.68	0.866667	0	0	0	0	0	0	0
A. Bellville	21-MAR-17		1	5.4m	0.0	2	0	1	1	0	1	1		0	0	0	1	0	0	0	0	0	0	1	0	1	4.29	0.794444	0	0	0	0	0	0	0
A. Bellville	21-MAR-17		1	5.4m	1.0	2	0	1	1	2	1	2		0	0	0	1	0	0	0	0	0	0	1	0	1	4.14	0.766667	0	0	0	0	0	0	0
A. Bellville	21-MAR-17		1	5.4m	1.0	3	1	1	1	0	1	1		0	0	0	0	1	0	0	0	0	0	0	1	1	6.39	1.18333	0	0	0	0	0	0	0
A. Bellville	21-MAR-17		1	5.4m	1.0	3	1	1	1	2	1	1		0	0	0	0	1	0	0	0	0	0	0	1	1	4.43	0.82037	0	0	0	0	0	0	0
A. Bellville	21-MAR-17		1	5.4m	1.0	3	1	1	1	0	1	1		0	0	0	0	1	0	0	0	0	0	0	1	1	4.31	0.798148	0	0	0	0	0	0	0
A. Bellville	21-MAR-17		1	5.4m	1.0	2	0	1	1	2	2	1		0	0	0	1	0	0	0	0	0	0	1	0	1	4.41	0.816667	0	0	0	0	0	0	0
A. Bellville	21-MAR-17		1	5.4m	1.0	7	0	3	1	1	2	2		0	0	0	0	0	0	0	0	1	0	1	0	1	4.79	0.887037	0	0	0	1	0	2	0
A. Bellville	21-MAR-17		1	5.4m	1.0	7	0	3	1	1	2	2		0	0	0	0	0	0	0	0	1	0	1	0	1	4.53	0.838889	0	0	0	1	0	2	0
A. Bellville	21-MAR-17		1	5.4m	1.0	2	0	1	1	2	2	2		0	0	0	1	0	0	0	0	0	0	1	0	1	6.43	1.19074	0	0	0	0	0	0	0
A. Bellville	21-MAR-17		1	5.4m	1.0	2	0	1	1	2	2	2		0	0	0	1	0	0	0	0	0	0	1	0	1	6.35	1.17593	0	0	0	0	0	0	0
A. Bellville	21-MAR-17		1	5.4m	1.0	2	0	1	1	2	2	3		0	0	0	1	0	0	0	0	0	0	1	0	1	6.28	1.16296	0	0	0	0	0	0	0
A. Bellville	21-MAR-17		1	5.4m	1.0	2	0	1	1	1	2	2		0	0	0	1	0	0	0	0	0	0	1	0	1	6.15	1.13889	0	0	0	0	0	0	0
A. Bellville	21-MAR-17		1	5.4m	1.0	2	0	1	1	0	2	1		0	0	0	1	0	0	0	0	0	0	1	0	1	6.14	1.13704	0	0	0	0	0	0	0
A. Bellville	21-MAR-17		1	5.4m	0.0	2	0	1	1	1	2	2		0	0	0	1	0	0	0	0	0	0	1	0	1	5.99	1.10926	0	0	0	0	0	0	0
A. Bellville	21-MAR-17		1	5.4m	0.0	2	0	1	1	2	2	2		0	0	0	1	0	0	0	0	0	0	1	0	1	5.88	1.08889	0	0	0	0	0	0	0
A. Bellville	21-MAR-17		1	5.4m	1.0	2	0		1	2	2	1		0	0	0	1	0	0	0	0	0	0	1	0	1	5.76	1.06667	0	0	0	0	0	0	0
A. Bellville	21-MAR-17		1	5.4m	0.0	2	0	1	1	1	2	2		0	0	0	1	0	0	0	0	0	0	1	0	1	5.2	0.962963	0	0	0	0	0	0	0
A. Bellville	21-MAR-17		1	5.4m	0.0	2	0	1	1	1	2	2		0	0	0	1	0	0	0	0	0	0	1	0	1	5.13	0.95	0	0	0	0	0	0	0
A. Bellville	21-MAR-17		1	5.4m	1.0	2	0	1	1	2	2	2		0	0	0	1	0	0	0	0	0	0	1	0	1	4.96	0.918519	0	0	0	0	0	0	0
A. Bellville	21-MAR-17		1	5.4m	1.0	2	0	1	1	2	2	2		0	0	0	1	0	0	0	0	0	0	1	0	1	4.83	0.894444	0	0	0	0	0	0	0
A. Bellville	21-MAR-17		1	5.4m	1.0	2	0	1	1	1	2	2		0	0	0	1	0	0	0	0	0	0	1	0	1	4.72	0.874074	0	0	0	0	0	0	0
A. Bellville	21-MAR-17		1	5.4m	1.0	2	0	1	1	2	2	2		0	0	0	1	0	0	0	0	0	0	1	0	1	4.44	0.822222	0	0	0	0	0	0	0
A. Bellville	21-MAR-17		1	5.4m	1.0	2	0	1	1	1	2	2		0	0	0	1	0	0	0	0	0	0	1	0	1	4.39	0.812963	0	0	0	0	0	0	0
A. Bellville	21-MAR-17		1	5.4m	1.0	2	0	1	1	2	2	1		0	0	0	1	0	0	0	0	0	0	1	0	1	4.34	0.803704	0	0	0	0	0	0	0
A. Bellville	21-MAR-17		1	5.4m	1.0	2	0	1	1	2	2	2		0	0	0	1	0	0	0	0	0	0	1	0	1	4.33	0.801852	0	0	0	0	0	0	0
A. Bellville	21-MAR-17		1	5.4m	1.0	2	0	1	1	2	2	1		0	0	0	1	0	0	0	0	0	0	1	0	1	4.11	0.761111	0	0	0	0	0	0	0
A. Bellville	21-MAR-17		1	5.4m	1.0	2	0	1	1	2	2	1		0	0	0	1	0	0	0	0	0	0	1	0	1	3.8	0.703704	0	0	0	0	0	0	0
A. Bellville	21-MAR-17		1	5.4m	0.0	2	0	1	1	1	2	2		0	0	0	1	0	0	0	0	0	0	1	0	1	3.61	0.668519	0	0	0	0	0	0	0
A. Bellville	21-MAR-17		1	5.4m	0.0	2	0	1	1	1	2	2		0	0	0	1	0	0	0	0	0	0	1	0	1	3.45	0.638889	0	0	0	0	0	0	0
A. Bellville	21-MAR-17		1	5.4m	0.0	2	0	1	1	1	2	2		0	0	0	1	0	0	0	0	0	0	1	0	1	3.22	0.596296	0	0	0	0	0	0	0
A. Bellville	21-MAR-17		1	5.4m	0.0	3	1	1	1	2	2	1		0	0	0	0	1	0	0	0	0	0	0	1	1	6.47	1.19815	0	0	0	0	0	0	0
A. Bellville	21-MAR-17		1	5.4m	0.0	3	1	1	1	2	2	2		0	0	0	0	1	0	0	0	0	0	0	1	1	6.41	1.18704	0	0	0	0	0	0	0
A. Bellville	21-MAR-17		1	5.4m	1.0	3	1	1	1	2	2	2		0	0	0	0	1	0	0	0	0	0	0	1	1	6.14	1.13704	0	0	0	0	0	0	0
A. Bellville	21-MAR-17		1	5.4m	0.0	3	1	1	1	2	2	1		0	0	0	0	1	0	0	0	0	0	0	1	1	6	1.11111	0	0	0	0	0	0	0
A. Bellville	21-MAR-17		1	5.4m	1.0	3	1	1	1	2	2	2		0	0	0	0	1	0	0	0	0	0	0	1	1	5.81	1.07593	0	0	0	0	0	0	0
A. Bellville	21-MAR-17		1	5.4m	1.0	3	1	1	1	2	2	1		0	0	0	0	1	0	0	0	0	0	0	1	1	5.31	0.983333	0	0	0	0	0	0	0
A. Bellville	21-MAR-17		1	5.4m	1.0	3	1	1	1	2	2	2		0	0	0	0	1	0	0	0	0	0	0	1	1	5.24	0.97037	0	0	0	0	0	0	0
A. Bellville	21-MAR-17		1	5.4m	1.0	3	1	1	1	2	2	2		0	0	0	0	1	0	0	0	0	0	0	1	1	5.22	0.966667	0	0	0	0	0	0	0
A. Bellville	21-MAR-17		1	5.4m	1.0	3	1	1	1	1	2	2		0	0	0	0	1	0	0	0	0	0	0	1	1	5.15	0.953704	0	0	0	0	0	0	0
A. Bellville	21-MAR-17		1	5.4m	1.0	3	1	1	1	2	2	1		0	0	0	0	1	0	0	0	0	0	0	1	1	4.98	0.922222	0	0	0	0	0	0	0
A. Bellville	21-MAR-17		1	5.4m	0.0	3	1	1	1	0	2	1		0	0	0	0	1	0	0	0	0	0	0	1	1	4.96	0.918519	0	0	0	0	0	0	0
A. Bellville	21-MAR-17		1	5.4m	1.0	3	1	1	1	0	2	1		0	0	0	0	1	0	0	0	0	0	0	1	1	4.67	0.864815	0	0	0	0	0	0	0
A. Bellville	21-MAR-17		1	5.4m	1.0	3	1	1	1	0	2	1		0	0	0	0	1	0	0	0	0	0	0	1	1	4.58	0.848148	0	0	0	0	0	0	0
A. Bellville	21-MAR-17		1	5.4m	1.0	3	1	1	1	2	2	2		0	0	0	0	1	0	0	0	0	0	0	1	1	4.46	0.825926	0	0	0	0	0	0	0
A. Bellville	21-MAR-17		1	5.4m	1.0	3	1	1	1	2	2	2		0	0	0	0	1	0	0	0	0	0	0	1	1	4.45	0.824074	0	0	0	0	0	0	0
A. Bellville	21-MAR-17		1	5.4m	1.0	3	1	1	1	2	2	2		0	0	0	0	1	0	0	0	0	0	0	1	1	4.4	0.814815	0	0	0	0	0	0	0
A. Bellville	21-MAR-17		1	5.4m	0.0	3	1	1	1	2	2	2		0	0	0	0	1	0	0	0	0	0	0	1	1	4.34	0.803704	0	0	0	0	0	0	0
A. Bellville	21-MAR-17		1	5.4m	1.0	3	1	1	1	2	2	2		0	0	0	0	1	0	0	0	0	0	0	1	1	4.19	0.775926	0	0	0	0	0	0	0
A. Bellville	21-MAR-17		1	5.4m	1.0	3	1	1	1	2	2	2		0	0	0	0	1	0	0	0	0	0	0	1	1	4.13	0.764815	0	0	0	0	0	0	0
A. Bellville	21-MAR-17		1	5.4m	1.0	3	1	1	1	2	2	2		0	0	0	0	1	0	0	0	0	0	0	1	1	4.05	0.75	0	0	0	0	0	0	0
A. Bellville	21-MAR-17		1	5.4m	1.0	3	1	1	1	1	2	2		0	0	0	0	1	0	0	0	0	0	0	1	1	4	0.740741	0	0	0	0	0	0	0
A. Bellville	21-MAR-17		1	5.4m	1.0	3	1	1	1	2	2	2		0	0	0	0	1	0	0	0	0	0	0	1	1	3.91	0.724074	0	0	0	0	0	0	0
A. Bellville	21-MAR-17		1	5.4m	1.0	3	1	1	1	2	2	2		0	0	0	0	1	0	0	0	0	0	0	1	1	3.83	0.709259	0	0	0	0	0	0	0
A. Bellville	21-MAR-17		1	5.4m	1.0	3	1	1	1	0	2	1		0	0	0	0	1	0	0	0	0	0	0	1	1	3.79	0.701852	0	0	0	0	0	0	0
A. Bellville	21-MAR-17		1	5.4m	1.0	3	1	1	1	2	2	2		0	0	0	0	1	0	0	0	0	0	0	1	1	3.71	0.687037	0	0	0	0	0	0	0
A. Bellville	21-MAR-17		1	5.4m	0.0	3	1	1	1	2	2	2		0	0	0	0	1	0	0	0	0	0	0	1	1	3.71	0.687037	0	0	0	0	0	0	0
A. Bellville	21-MAR-17		1	5.4m	1.0	3	1	1	1	1	2	2		0	0	0	0	1	0	0	0	0	0	0	1	1	3.51	0.65	0	0	0	0	0	0	0
A. Bellville	21-MAR-17		1	5.4m	1.0	3	1	1	1	1	2	1		0	0	0	0	1	0	0	0	0	0	0	1	1	3.22	0.596296	0	0	0	0	0	0	0
A. Bellville	21-MAR-17		1	5.4m	1.0	3	1	1	0					1	0	0	1	1	0	0	0	0	0	1	1	2	5.87	1.08704	1	0	0	0	1	0	6
A. Bellville	21-MAR-17		1	5.4m	1.0	3	1	1	0					1	0	0	1	1	0	0	0	0	0	1	1	2	5.11	0.946296	1	0	0	0	1	0	6
A. Bellville	21-MAR-17		1	5.4m	1.0	2	0	1	1	2	2	1		1	0	0	3	0	0	0	0	0	0	3	0	3	4.69	0.868519	1	0	0	0	1	0	1
A. Bellville	21-MAR-17		1	5.4m	1.0	2	0	1	0					1	0	0	1	1	0	0	0	0	0	1	1	2	4.21	0.77963	0	1	0	0	2	0	6
A. Bellville	21-MAR-17		1	5.4m	1.0	3	1	1	0					1	0	0	0	2	0	0	0	0	0	0	2	2	5.57	1.03148	0	1	0	0	2	0	2
A. Bellville	21-MAR-17		1	5.4m	1.0	3	1	1	0					1	0	0	0	2	0	0	0	0	0	0	2	2	5.13	0.95	0	1	0	0	2	0	2
A. Bellville	21-MAR-17		1	5.4m	1.0	5	1	2	0					1	0	0	0	0	2	0	0	0	0	0	2	2	3.96	0.733333	0	1	0	0	2	0	2
A. Bellville	21-MAR-17		1	5.4m	1.0	3	1	1	0					1	0	0	0	3	0	0	0	0	0	0	3	3	6.18	1.14444	0	1	0	0	2	0	2
A. Bellville	21-MAR-17		1	5.4m	1.0	5	1	2	0					1	0	0	0	0	3	0	0	0	0	0	3	3	5.78	1.07037	0	1	0	0	2	0	2
A. Bellville	21-MAR-17		1	5.4m	1.0	5	1	2	1	1	2	1		1	0	0	0	1	1	0	0	0	0	0	2	2	6.09	1.12778	0	1	0	0	2	0	2
A. Bellville	21-MAR-17		1	5.4m	1.0	5	1	2	1	1	2	2		1	0	0	0	0	2	0	0	0	0	0	2	2	4.3	0.796296	0	1	0	0	2	0	2
A. Bellville	21-MAR-17		1	5.4m	1.0	3	1	1	1	2	2	2		1	0	0	0	2	0	0	0	0	0	0	2	2	4.28	0.792593	0	1	0	0	2	0	2
A. Bellville	21-MAR-17		1	5.4m	1.0	3	1	1	0					1	0	0	0	1	0	0	1	0	0	1	1	2	6.98	1.29259	1	0	0	1	3	3	4
A. Bellville	21-MAR-17		1	5.4m	1.0	3	1	1	0					1	0	0	2	1	0	0	1	0	0	2	1	3	4.23	0.783333	1	0	0	1	3	3	5
A. Bellville	21-MAR-17		1	5.4m	1.0	2	0	1	1	1	2	2		1	0	0	2	0	0	0	1	0	0	2	0	2	4.98	0.922222	1	0	0	1	3	2	3
A. Bellville	21-MAR-17		1	5.4m	1.0	3	1	1	1	2	2			1	0	0	0	1	0	0	0	2	0	0	3	3	4.54	0.840741	0	1	0	1	4	2	4
A. Bellville	21-MAR-17		1	5.4m	1.0	3	1	1	1	0	3	3	0	1	0	0	0	1	0	0	0	1	0	0	2	2	4.14	0.766667	0	1	0	1	4	3	4
A. Bellville	21-MAR-17		1	5.4m	1.0	2	0	1	1	0	3	3	0	1	0	0	1	0	0	0	0	0	1	0	1	1	6.13	1.13519	0	0	0	1	10	4	3
Leah Bouterse	23-MAR-17		1	5.4m	0.0	2	0	1	0			0		0	0	0	1	0	0	0	0	0	0	1	0	1	5.27	0.975926	0	0	0	0	0	0	0
Leah Bouterse	23-MAR-17		1	5.4m	0.0	2	0	1	0			0		0	0	0	1	0	0	0	0	0	0	1	0	1	4.91	0.909259	0	0	0	0	0	0	0
Leah Bouterse	23-MAR-17		1	5.4m	0.0	2	0	1	0			0		0	0	0	1	0	0	0	0	0	0	1	0	1	4.65	0.861111	0	0	0	0	0	0	0
Leah Bouterse	23-MAR-17		1	5.4m	0.0	2	0	1	0			0		0	0	0	1	0	0	0	0	0	0	1	0	1	4.64	0.859259	0	0	0	0	0	0	0
Leah Bouterse	23-MAR-17		1	5.4m	0.0	2	0	1	0			0		0	0	0	0	1	0	0	0	0	0	1	0	1	4.62	0.855556	0	0	0	0	0	0	0
Leah Bouterse	23-MAR-17		1	5.4m	0.0	2	0	1	0			0		0	0	0	1	0	0	0	0	0	0	1	0	1	4.57	0.846296	0	0	0	0	0	0	0
Leah Bouterse	23-MAR-17		1	5.4m	0.0	2	0	1	0			0		0	0	0	1	0	0	0	0	0	0	1	0	1	4.52	0.837037	0	0	0	0	0	0	0
Leah Bouterse	23-MAR-17		1	5.4m	0.0	1	0	0	0			0		0	1	0	0	0	0	0	0	0	0	1	0	1	4.37	0.809259	0	0	0	0	0	0	0
Leah Bouterse	23-MAR-17		1	5.4m	0.0	2	0	1	0			0		0	0	0	0	1	0	0	0	0	0	1	0	1	4.32	0.8	0	0	0	0	0	0	0
Leah Bouterse	23-MAR-17		1	5.4m	0.0	2	0	1	0			0		0	0	0	1	0	0	0	0	0	0	1	0	1	4.15	0.768519	0	0	0	0	0	0	0
Leah Bouterse	23-MAR-17		1	5.4m	0.0	2	0	1	0			0		0	0	0	0	1	0	0	0	0	0	1	0	1	3.92	0.725926	0	0	0	0	0	0	0
Leah Bouterse	23-MAR-17		1	5.4m	0.0	2	0	1	0			0		0	0	0	0	1	0	0	0	0	0	1	0	1	3.77	0.698148	0	0	0	0	0	0	0
Leah Bouterse	23-MAR-17		1	5.4m	0.0	2	0	1	0			0		0	0	0	1	0	0	0	0	0	0	1	0	1	3.74	0.692593	0	0	0	0	0	0	0
Leah Bouterse	23-MAR-17		1	5.4m	0.0	2	0	1	0			0		0	0	0	0	1	0	0	0	0	0	1	0	1	3.58	0.662963	0	0	0	0	0	0	0
Leah Bouterse	23-MAR-17		1	5.4m	0.0	2	0	1	0			0		0	0	0	1	0	0	0	0	0	0	1	0	1	3.57	0.661111	0	0	0	0	0	0	0
Leah Bouterse	23-MAR-17		1	5.4m	0.0	1	0	0	0			0		0	1	0	0	0	0	0	0	0	0	1	0	1	3.53	0.653704	0	0	0	0	0	0	0
Leah Bouterse	23-MAR-17		1	5.4m	0.0	3	0	1	0			0		0	0	0	0	1	0	0	0	0	0	1	0	1	3.32	0.614815	0	0	0	0	0	0	0
Leah Bouterse	23-MAR-17		1	5.4m	0.0	3	1	1	1	0	0	2	0	0	0	0	0	1	0	0	0	0	0	0	1	1	5.26	0.974074	0	0	0	1	0	1	0
Leah Bouterse	23-MAR-17		1	5.4m	0.0	3	1	1	1	1	0	2	0	0	0	0	0	1	0	0	0	0	0	0	1	1	4.83	0.894444	0	0	0	1	0	1	0
Leah Bouterse	23-MAR-17		1	5.4m	0.0	2	0	1	1	0	1	1		0	0	0	1	0	0	0	0	0	0	1	0	1	4.49	0.831481	0	0	0	0	0	0	0
Leah Bouterse	23-MAR-17		1	5.4m	0.0	2	0	1	1	0	1	1		0	0	0	1	0	0	0	0	0	0	1	0	1	4.25	0.787037	0	0	0	0	0	0	0
Leah Bouterse	23-MAR-17		1	5.4m	0.0	3	1	1	1	0	1	1		0	0	0	0	1	0	0	0	0	0	0	1	1	6.54	1.21111	0	0	0	0	0	0	0
Leah Bouterse	23-MAR-17		1	5.4m	0.0	3	1	1	1	0	1	1		0	0	0	0	1	0	0	0	0	0	0	1	1	5.01	0.927778	0	0	0	0	0	0	0
Leah Bouterse	23-MAR-17		1	5.4m	0.0	3	1	1	1	0	1	1		0	0	0	0	1	0	0	0	0	0	0	1	1	4.19	0.775926	0	0	0	0	0	0	0
Leah Bouterse	23-MAR-17		1	5.4m	0.0	3	1	1	1	0	1	1		0	0	0	0	1	0	0	0	0	0	0	1	1	4.07	0.753704	0	0	0	0	0	0	0
Leah Bouterse	23-MAR-17		1	5.4m	0.0	3	1	1	1	0	1	1		0	0	0	0	1	0	0	0	0	0	0	1	1	4.06	0.751852	0	0	0	0	0	0	0
Leah Bouterse	23-MAR-17		1	5.4m	0.0	3	1	1	1	0	1	1		0	0	0	1	1	0	0	0	0	0	0	1	1	3.93	0.727778	0	0	0	0	0	0	0
Leah Bouterse	23-MAR-17		1	5.4m	0.0	3	1	1	1	0	1	1		0	0	0	0	1	0	0	0	0	0	0	1	1	3.85	0.712963	0	0	0	0	0	0	0
Leah Bouterse	23-MAR-17		1	5.4m	0.0	3	1	1	1	0	1	1		0	0	0	0	1	0	0	0	0	0	0	1	1	3.71	0.687037	0	0	0	0	0	0	0
Leah Bouterse	23-MAR-17		1	5.4m	0.0	2	0	1	1	0	2	1		0	0	0	1	0	0	0	0	0	0	1	0	1	5.67	1.05	0	0	0	0	0	0	0
Leah Bouterse	23-MAR-17		1	5.4m	0.0	2	0	1	1	2	2	1		0	0	0	1	0	0	0	0	0	0	1	0	1	4.98	0.922222	0	0	0	0	0	0	0
Leah Bouterse	23-MAR-17		1	5.4m	0.0	2	0	1	1	2	2	1		0	0	0	1	0	0	0	0	0	0	1	0	1	4.93	0.912963	0	0	0	0	0	0	0
Leah Bouterse	23-MAR-17		1	5.4m	0.0	2	0	1	1	0	2	1		0	0	0	1	0	0	0	0	0	0	1	0	1	4.88	0.903704	0	0	0	0	0	0	0
Leah Bouterse	23-MAR-17		1	5.4m	0.0	2	0	1	1	2	2	1		0	0	0	1	0	0	0	0	0	0	1	0	1	4.76	0.881481	0	0	0	0	0	0	0
Leah Bouterse	23-MAR-17		1	5.4m	0.0	2	0	1	1	2	2	1		0	0	0	1	0	0	0	0	0	0	1	0	1	4.52	0.837037	0	0	0	0	0	0	0
Leah Bouterse	23-MAR-17		1	5.4m	0.0	2	0	1	1	2	2	1		0	0	0	1	0	0	0	0	0	0	1	0	1	4.41	0.816667	0	0	0	0	0	0	0
Leah Bouterse	23-MAR-17		1	5.4m	0.0	2	0	1	1	2	2	1		0	0	0	1	0	0	0	0	0	0	1	0	1	4.4	0.814815	0	0	0	0	0	0	0
Leah Bouterse	23-MAR-17		1	5.4m	0.0	2	0	1	1	2	2	1		0	0	0	1	0	0	0	0	0	0	1	0	1	4.38	0.811111	0	0	0	0	0	0	0
Leah Bouterse	23-MAR-17		1	5.4m	0.0	2	0	1	1	2	2	1		0	0	0	1	0	0	0	0	0	0	1	0	1	4.38	0.811111	0	0	0	0	0	0	0
Leah Bouterse	23-MAR-17		1	5.4m	0.0	2	0	1	1	0	2	1		0	0	0	1	0	0	0	0	0	0	1	0	1	4.35	0.805556	0	0	0	0	0	0	0
Leah Bouterse	23-MAR-17		1	5.4m	0.0	2	0	1	1	0	2	1		0	0	0	1	0	0	0	0	0	0	1	0	1	4.32	0.8	0	0	0	0	0	0	0
Leah Bouterse	23-MAR-17		1	5.4m	0.0	2	0	1	1	2	2	1		0	0	0	1	0	0	0	0	0	0	1	0	1	4.23	0.783333	0	0	0	0	0	0	0
Leah Bouterse	23-MAR-17		1	5.4m	0.0	2	0	0	1	2	2	1		0	1	0	0	0	0	0	0	0	0	1	0	1	4.2	0.777778	0	0	0	0	0	0	0
Leah Bouterse	23-MAR-17		1	5.4m	0.0	2	0	0	1	2	2	1		0	1	0	0	0	0	0	0	0	0	1	0	1	4.04	0.748148	0	0	0	0	0	0	0
Leah Bouterse	23-MAR-17		1	5.4m	0.0	2	0	1	1	2	2	1		0	0	0	1	0	0	0	0	0	0	1	0	1	4.01	0.742593	0	0	0	0	0	0	0
Leah Bouterse	23-MAR-17		1	5.4m	0.0	2	0	1	1	0	2	1		0	0	0	1	0	0	0	0	0	0	0	1	1	3.9	0.722222	0	0	0	0	0	0	0
Leah Bouterse	23-MAR-17		1	5.4m	0.0	2	0	1	1	2	2	1		0	0	0	1	0	0	0	0	0	0	1	0	1	3.81	0.705556	0	0	0	0	0	0	0
Leah Bouterse	23-MAR-17		1	5.4m	0.0	3	1	1	1	0	2	1		0	0	0	0	1	0	0	0	0	0	0	1	1	6.04	1.11852	0	0	0	0	0	0	0
Leah Bouterse	23-MAR-17		1	5.4m	0.0	3	1	1	1	2	2	1		0	0	0	0	1	0	0	0	0	0	0	1	1	5.37	0.994444	0	0	0	0	0	0	0
Leah Bouterse	23-MAR-17		1	5.4m	0.0	3	1	1	1	2	2	1		0	0	0	0	1	0	0	0	0	0	0	1	1	5.11	0.946296	0	0	0	0	0	0	0
Leah Bouterse	23-MAR-17		1	5.4m	0.0	1	1	0	1	3	2	1		0	0	1	0	0	0	0	0	0	0	0	1	1	4.91	0.909259	0	0	0	0	0	0	0
Leah Bouterse	23-MAR-17		1	5.4m	0.0	3	1	1	1	2	2	1		0	0	0	0	1	0	0	0	0	0	0	1	1	4.7	0.87037	0	0	0	0	0	0	0
Leah Bouterse	23-MAR-17		1	5.4m	0.0	3	1	1	1	1	2	1		0	0	0	0	1	0	0	0	0	0	0	1	1	4.66	0.862963	0	0	0	0	0	0	0
Leah Bouterse	23-MAR-17		1	5.4m	0.0	3	1	1	1	0	2	1		0	0	0	0	1	0	0	0	0	0	0	1	1	4.42	0.818519	0	0	0	0	0	0	0
Leah Bouterse	23-MAR-17		1	5.4m	0.0	3	1	1	1	2	2	1		0	0	0	0	1	0	0	0	0	0	0	1	1	4.36	0.807407	0	0	0	0	0	0	0
Leah Bouterse	23-MAR-17		1	5.4m	0.0	3	1	1	1	1	2	1		0	0	0	0	1	0	0	0	0	0	0	1	1	4.21	0.77963	0	0	0	0	0	0	0
Leah Bouterse	23-MAR-17		1	5.4m	0.0	3	1	1	1	3	2	1		0	0	0	0	1	0	0	0	0	0	0	1	1	4.16	0.77037	0	0	0	0	0	0	0
Leah Bouterse	23-MAR-17		1	5.4m	0.0	3	1	1	1	0	2	1		0	0	0	0	1	0	0	0	0	0	0	1	1	4.11	0.761111	0	0	0	0	0	0	0
Leah Bouterse	23-MAR-17		1	5.4m	0.0	3	1	1	1	2	2	1		0	0	0	0	1	0	0	0	0	0	0	1	1	4.01	0.742593	0	0	0	0	0	0	0
Leah Bouterse	23-MAR-17		1	5.4m	0.0	3	1	1	1	0	2	1		0	0	0	0	1	0	0	0	0	0	0	1	1	3.98	0.737037	0	0	0	0	0	0	0
Leah Bouterse	23-MAR-17		1	5.4m	0.0	3	1	1	1	2	2	1		0	0	0	0	1	0	0	0	0	0	0	1	1	3.88	0.718519	0	0	0	0	0	0	0
Leah Bouterse	23-MAR-17		1	5.4m	0.0	3	1	1	1	2	2	1		0	0	0	0	1	0	0	0	0	0	0	1	1	3.85	0.712963	0	0	0	0	0	0	0
Leah Bouterse	23-MAR-17		1	5.4m	0.0	3	1	1	1	0	2	1		0	0	0	0	1	0	0	0	0	0	0	1	1	3.81	0.705556	0	0	0	0	0	0	0
Leah Bouterse	23-MAR-17		1	5.4m	0.0	3	1	1	1	2	2	1		0	0	0	0	1	0	0	0	0	0	0	1	1	3.61	0.668519	0	0	0	0	0	0	0
Leah Bouterse	23-MAR-17		1	5.4m	0.0	3	1	1	1	2	2	1		0	0	0	0	1	0	0	0	0	0	0	1	1	3.37	0.624074	0	0	0	0	0	0	0
Leah Bouterse	23-MAR-17		1	5.4m	0.0	3	1	1	1	2	2	1		1	0	0	0	1	0	0	0	0	1	0	1	1	5.37	0.994444	0	0	0	0	0	0	6
Leah Bouterse	23-MAR-17		1	5.4m	0.0	3	1	1	1	0	2	1		1	1	0	0	1	0	0	0	0	0	1	1	2	6.19	1.1463	1	0	0	0	1	0	6
Leah Bouterse	23-MAR-17		1	5.4m	0.0	3	1	1	1	2	2	1		1	0	0	1	1	0	0	0	0	0	1	1	2	5.3	0.981481	1	0	0	0	1	0	6
Leah Bouterse	23-MAR-17		1	5.4m	0.0	3	1	1	1	0	1	1		1	0	0	0	2	0	0	0	0	0	0	2	2	4.77	0.883333	0	1	0	0	2	0	2
Leah Bouterse	23-MAR-17		1	5.4m	0.0	3	1	1	1	0	1	1		1	0	0	0	2	0	0	0	0	0	0	2	2	4.74	0.877778	0	1	0	0	2	0	2
Leah Bouterse	23-MAR-17		1	5.4m	0.0	3	1	1	1	2	1	1		1	0	0	0	2	0	0	0	0	0	0	2	2	3.65	0.675926	0	1	0	0	2	0	2
Leah Bouterse	23-MAR-17		1	5.4m	0.0	2	0	1	1	2	2	1		1	0	0	1	1	0	0	0	0	0	1	1	2	5.28	0.977778	0	1	0	0	2	0	6
Leah Bouterse	23-MAR-17		1	5.4m	0.0	2	0	1	1	1	2	1		1	0	0	1	1	0	0	0	0	0	1	1	2	4.91	0.909259	0	1	0	0	2	0	6
Leah Bouterse	23-MAR-17		1	5.4m	0.0	2	0	1	1	1	2	1		1	0	0	1	1	0	0	0	0	0	1	1	2	3.61	0.668519	0	1	0	0	2	0	6
Leah Bouterse	23-MAR-17		1	5.4m	0.0	3	1	1	1	2	2	1		1	0	0	0	2	0	0	0	0	0	0	2	2	5.6	1.03704	0	1	0	0	2	0	2
Leah Bouterse	23-MAR-17		1	5.4m	0.0	3	1	1	1	2	2	1		1	0	0	0	1	1	0	0	0	0	0	2	2	5.06	0.937037	0	1	0	0	2	0	2
Leah Bouterse	23-MAR-17		1	5.4m	0.0	3	1	1	1	2	2	1		1	0	0	0	2	0	0	0	0	0	0	2	2	4.85	0.898148	0	1	0	0	2	0	2
Leah Bouterse	23-MAR-17		1	5.4m	0.0	3	1	1	1	1	2	1		1	0	0	0	2	0	0	0	0	0	0	2	2	4.84	0.896296	0	1	0	0	2	0	2
Leah Bouterse	23-MAR-17		1	5.4m	0.0	3	1	1	1	3	2	1		1	0	0	0	2	0	0	0	0	0	0	2	2	4.61	0.853704	0	1	0	0	2	0	2
Leah Bouterse	23-MAR-17		1	5.4m	0.0	3	1	1	1	1	2	1		1	0	0	0	3	0	0	0	0	0	0	3	3	6.81	1.26111	0	1	0	0	2	0	2
Leah Bouterse	23-MAR-17		1	5.4m	0.0	3	1	1	1	1	2	1		1	0	0	0	3	0	0	0	0	0	0	3	3	4.65	0.861111	0	1	0	0	2	0	2
Leah Bouterse	23-MAR-17		1	5.4m	0.0	3	1	1	1	2	0	2	0	1	0	0	0	1	0	0	1	0	0	1	1	2	5.89	1.09074	1	0	0	1	3	1	4
Leah Bouterse	23-MAR-17		1	5.4m	0.0	3	1	1	1	0	0	2	0	1	0	0	1	1	0	0	0	0	0	1	1	2	6.25	1.15741	1	0	0	1	3	1	5
Leah Bouterse	23-MAR-17		1	5.4m	0.0	2	0	1	0	0	0	2	0	1	0	0	1	1	0	0	0	0	0	1	1	2	5.45	1.00926	0	1	0	1	4	1	5
Leah Bouterse	23-MAR-17		1	5.4m	0.0	3	1	1	1	1	2	1		1	0	0	0	1	0	0	1	0	0	2	0	2	4.9	0.907407	0	0	0	1	4	2	4
Leah Bouterse	23-MAR-17		1	5.4m	0.0	3	1	1	1	3	2	1		1	0	0	0	1	0	0	0	1	0	0	2	2	5.64	1.04444	0	1	0	1	4	2	4
Leah Bouterse	23-MAR-17		1	5.4m	1.0	2	1	1	1	0	3	3		1	0	0	0	2	0	0	0	0	0	0	2	2	4.49	0.831481	0	1	0	1	4	4	4
Leah Bouterse	23-MAR-17		1	5.4m	0.0	3	1	1	1	2	1	1		1	0	0	1	1	0	0	0	1	0	1	2	3	4	0.740741	0	0	1	1	5	2	5
Leah Bouterse	23-MAR-17		1	5.4m	0.0	3	1	1	1	0	1	0		1	0	0	1	1	0	0	0	2	0	1	3	4	5.87	1.08704	0	0	1	1	5	2	5
Leah Bouterse	23-MAR-17		1	5.4m	0.0	3	1	1	1	3	2	1		1	0	0	0	1	0	0	1	1	0	1	2	3	5.98	1.10741	0	0	1	1	5	2	4
Leah Bouterse	23-MAR-17		1	5.4m	0.0	3	1	1	1	2	2	1		1	0	1	1	1	0	0	0	0	0	1	2	3	6.28	1.16296	0	0	1	0	6	0	6
Leah Bouterse	23-MAR-17		1	5.4m	0.0	3	1	1	1	3	2	1		1	0	0	0	1	0	0	0	1	3	0	2	1	6.02	1.11481	0	0	0	1	10	0	4
Leah Bouterse	28-MAR-17		1	5.4m	1.0	2	0	1				0		0	0	0	1	0	0	0	0	0	0	1	0	1	5.12	0.948148	0	0	0	0	0	0	0
Leah Bouterse	28-MAR-17		1	5.4m	1.0	2	0	1	0			0		0	0	0	1	0	0	0	0	0	0	1	0	1	6.64	1.22963	0	0	0	0	0	0	0
Leah Bouterse	28-MAR-17		1	5.4m	1.0	2	0	1	0			0		0	0	0	1	0	0	0	0	0	0	1	0	1	6.21	1.15	0	0	0	0	0	0	0
Leah Bouterse	28-MAR-17		1	5.4m	1.0	2	0	0	0			0		0	1	0	0	0	0	0	0	0	0	1	0	1	6.01	1.11296	0	0	0	0	0	0	0
Leah Bouterse	28-MAR-17		1	5.4m	1.0	1	0	1	0			0		0	0	0	1	0	0	0	0	0	0	1	0	1	5.52	1.02222	0	0	0	0	0	0	0
Leah Bouterse	28-MAR-17		1	5.4m	1.0	2	0	0	0			0		0	1	0	0	0	0	0	0	0	0	1	0	1	5.52	1.02222	0	0	0	0	0	0	0
Leah Bouterse	28-MAR-17		1	5.4m	1.0	2	0	0	0			0		0	1	0	0	0	0	0	0	0	0	1	0	1	5.47	1.01296	0	0	0	0	0	0	0
Leah Bouterse	28-MAR-17		1	5.4m	1.0	2	0	0	0			0		0	1	0	0	0	0	0	0	0	0	1	0	1	5.26	0.974074	0	0	0	0	0	0	0
Leah Bouterse	28-MAR-17		1	5.4m	1.0	2	0	1	0			0		0	0	0	1	0	0	0	0	0	0	1	0	1	5.08	0.940741	0	0	0	0	0	0	0
Leah Bouterse	28-MAR-17		1	5.4m	1.0	2	0	1	0			0		0	0	0	1	0	0	0	0	0	0	1	0	1	4.98	0.922222	0	0	0	0	0	0	0
Leah Bouterse	28-MAR-17		1	5.4m	1.0	2	0	1	0			0		0	0	0	1	0	0	0	0	0	0	1	0	1	4.94	0.914815	0	0	0	0	0	0	0
Leah Bouterse	28-MAR-17		1	5.4m	1.0	2	0	1	0			0		0	0	0	1	0	0	0	0	0	0	1	0	1	4.9	0.907407	0	0	0	0	0	0	0
Leah Bouterse	28-MAR-17		1	5.4m	1.0	2	0	1	0			0		0	0	0	1	0	0	0	0	0	0	1	0	1	4.87	0.901852	0	0	0	0	0	0	0
Leah Bouterse	28-MAR-17		1	5.4m	1.0	2	0	1	0			0		0	0	0	1	0	0	0	0	0	0	1	0	1	4.57	0.846296	0	0	0	0	0	0	0
Leah Bouterse	28-MAR-17		1	5.4m	1.0	2	0	1	0			0		0	0	0	1	0	0	0	0	0	0	1	0	1	4.51	0.835185	0	0	0	0	0	0	0
Leah Bouterse	28-MAR-17		1	5.4m	1.0	2	0	1	0			0		0	0	0	1	0	0	0	0	0	0	1	0	1	4.41	0.816667	0	0	0	0	0	0	0
Leah Bouterse	28-MAR-17		1	5.4m	1.0	2	0	2	0			0		0	0	0	0	0	0	1	0	0	0	1	0	1	4.27	0.790741	0	0	0	0	0	0	0
Leah Bouterse	28-MAR-17		1	5.4m	1.0	2	0	1	0			0		0	0	0	1	0	0	0	0	0	0	1	0	1	4.26	0.788889	0	0	0	0	0	0	0
Leah Bouterse	28-MAR-17		1	5.4m	1.0	2	0	1	0			0		0	0	0	1	0	0	0	0	0	0	1	0	1	4.22	0.781481	0	0	0	0	0	0	0
Leah Bouterse	28-MAR-17		1	5.4m	1.0	2	0	1	0			0		0	0	0	1	0	0	0	0	0	0	1	0	1	4.18	0.774074	0	0	0	0	0	0	0
Leah Bouterse	28-MAR-17		1	5.4m	1.0	2	0	1	0			0		0	0	0	1	0	0	0	0	0	0	1	0	1	4.13	0.764815	0	0	0	0	0	0	0
Leah Bouterse	28-MAR-17		1	5.4m	1.0	2	0	1	0			0		0	0	0	1	0	0	0	0	0	0	1	0	1	4.12	0.762963	0	0	0	0	0	0	0
Leah Bouterse	28-MAR-17		1	5.4m	1.0	2	0	1	0			0		0	0	0	1	0	0	0	0	0	0	1	0	1	4.09	0.757407	0	0	0	0	0	0	0
Leah Bouterse	28-MAR-17		1	5.4m	1.0	2	0	1	0			0		0	0	0	1	0	0	0	0	0	0	1	0	1	4.08	0.755556	0	0	0	0	0	0	0
Leah Bouterse	28-MAR-17		1	5.4m	1.0	2	0	1	0			0		0	0	0	1	0	0	0	0	0	0	1	0	1	4.07	0.753704	0	0	0	0	0	0	0
Leah Bouterse	28-MAR-17		1	5.4m	1.0	2	0	1	0			0		0	0	0	1	0	0	0	0	0	0	1	0	1	4.05	0.75	0	0	0	0	0	0	0
Leah Bouterse	28-MAR-17		1	5.4m	1.0	2	0	1	0			0		0	0	0	1	0	0	0	0	0	0	1	0	1	4.04	0.748148	0	0	0	0	0	0	0
Leah Bouterse	28-MAR-17		1	5.4m	1.0	2	0	0	0			0		0	1	0	0	0	0	0	0	0	0	1	0	1	3.98	0.737037	0	0	0	0	0	0	0
Leah Bouterse	28-MAR-17		1	5.4m	1.0	2	0	1	0			0		0	0	0	1	0	0	0	0	0	0	1	0	1	3.95	0.731481	0	0	0	0	0	0	0
Leah Bouterse	28-MAR-17		1	5.4m	1.0	2	0	1	0			0		0	0	0	1	0	0	0	0	0	0	1	0	1	3.91	0.724074	0	0	0	0	0	0	0
Leah Bouterse	28-MAR-17		1	5.4m	1.0	2	0	1	0			0		0	0	0	1	0	0	0	0	0	0	1	0	1	3.91	0.724074	0	0	0	0	0	0	0
Leah Bouterse	28-MAR-17		1	5.4m	1.0	2	0	1	0			0		0	0	0	1	0	0	0	0	0	0	1	0	1	3.9	0.722222	0	0	0	0	0	0	0
Leah Bouterse	28-MAR-17		1	5.4m	1.0	2	0	1	0			0		0	0	0	1	0	0	0	0	0	0	1	0	1	3.9	0.722222	0	0	0	0	0	0	0
Leah Bouterse	28-MAR-17		1	5.4m	1.0	2	0	1	0			0		0	0	0	1	0	0	0	0	0	0	1	0	1	3.87	0.716667	0	0	0	0	0	0	0
Leah Bouterse	28-MAR-17		1	5.4m	1.0	2	0	1	0			0		0	0	0	1	0	0	0	0	0	0	1	0	1	3.86	0.714815	0	0	0	0	0	0	0
Leah Bouterse	28-MAR-17		1	5.4m	1.0	2	0	1	0			0		0	0	0	1	0	0	0	0	0	0	1	0	1	3.81	0.705556	0	0	0	0	0	0	0
Leah Bouterse	28-MAR-17		1	5.4m	1.0	2	0	1	0			0		0	0	0	1	0	0	0	0	0	0	0	1	1	3.8	0.703704	0	0	0	0	0	0	0
Leah Bouterse	28-MAR-17		1	5.4m	1.0	2	0	1	0			0		0	0	0	1	0	0	0	0	0	0	1	0	1	3.79	0.701852	0	0	0	0	0	0	0
Leah Bouterse	28-MAR-17		1	5.4m	1.0	2	0	1	0			0		0	0	0	1	0	0	0	0	0	0	1	0	1	3.79	0.701852	0	0	0	0	0	0	0
Leah Bouterse	28-MAR-17		1	5.4m	1.0	2	0	1	0			0		0	0	0	1	0	0	0	0	0	0	1	0	1	3.78	0.7	0	0	0	0	0	0	0
Leah Bouterse	28-MAR-17		1	5.4m	1.0	2	0	1	0			0		0	0	0	1	0	0	0	0	0	0	1	0	1	3.75	0.694444	0	0	0	0	0	0	0
Leah Bouterse	28-MAR-17		1	5.4m	1.0	2	0	1	0			0		0	0	0	1	0	0	0	0	0	0	1	0	1	3.68	0.681481	0	0	0	0	0	0	0
Leah Bouterse	28-MAR-17		1	5.4m	1.0	2	0	1	0			0		0	0	0	1	0	0	0	0	0	0	1	0	1	3.68	0.681481	0	0	0	0	0	0	0
Leah Bouterse	28-MAR-17		1	5.4m	1.0	2	0	1	0			0		0	0	0	1	0	0	0	0	0	0	1	0	1	3.63	0.672222	0	0	0	0	0	0	0
Leah Bouterse	28-MAR-17		1	5.4m	1.0	2	0	1	0			0		0	0	0	1	0	0	0	0	0	0	1	0	1	3.49	0.646296	0	0	0	0	0	0	0
Leah Bouterse	28-MAR-17		1	5.4m	1.0	0	0	1	0			0		0	0	0	1	0	0	0	0	0	0	1	0	1	3.48	0.644444	0	0	0	0	0	0	0
Leah Bouterse	28-MAR-17		1	5.4m	1.0	2	0	1	0			0		0	0	0	1	0	0	0	0	0	0	1	0	1	3.45	0.638889	0	0	0	0	0	0	0
Leah Bouterse	28-MAR-17		1	5.4m	1.0	2	0	1	0			0		0	0	0	1	0	0	0	0	0	0	1	0	1	3.41	0.631481	0	0	0	0	0	0	0
Leah Bouterse	28-MAR-17		1	5.4m	1.0	2	0	1	0			0		0	0	0	1	0	0	0	0	0	0	1	0	1	3.37	0.624074	0	0	0	0	0	0	0
Leah Bouterse	28-MAR-17		1	5.4m	1.0	2	0	1	0			0		0	0	0	1	0	0	0	0	0	0	1	0	1	3.29	0.609259	0	0	0	0	0	0	0
Leah Bouterse	28-MAR-17		1	5.4m	1.0	3	1	1	0			0		0	0	0	1	0	0	0	0	0	0	0	1	1	4.75	0.87963	0	0	0	0	0	0	0
Leah Bouterse	28-MAR-17		1	5.4m	1.0	3	1	1	0			0		0	0	0	0	1	0	0	0	0	0	0	1	1	4.73	0.875926	0	0	0	0	0	0	0
Leah Bouterse	28-MAR-17		1	5.4m	1.0	3	1	1	0			0		0	0	0	0	1	0	0	0	0	0	0	1	1	4.56	0.844444	0	0	0	0	0	0	0
Leah Bouterse	28-MAR-17		1	5.4m	1.0	3	1	1	0			0		0	0	0	0	1	0	0	0	0	0	0	1	1	4.44	0.822222	0	0	0	0	0	0	0
Leah Bouterse	28-MAR-17		1	5.4m	1.0	3	1	1	0			0		0	0	0	0	1	0	0	0	0	0	0	1	1	4.38	0.811111	0	0	0	0	0	0	0
Leah Bouterse	28-MAR-17		1	5.4m	1.0	3	1	1	0			0		0	0	0	1	0	0	0	0	0	0	0	1	1	4.29	0.794444	0	0	0	0	0	0	0
Leah Bouterse	28-MAR-17		1	5.4m	1.0	3	1	1	0			0		0	0	0	0	1	0	0	0	0	0	0	1	1	4.25	0.787037	0	0	0	0	0	0	0
Leah Bouterse	28-MAR-17		1	5.4m	1.0	3	1	1	0			0		0	0	0	0	1	0	0	0	0	0	0	1	1	3.9	0.722222	0	0	0	0	0	0	0
Leah Bouterse	28-MAR-17		1	5.4m	1.0	3	1	1	0			0		0	0	0	0	1	0	0	0	0	0	0	1	1	3.67	0.67963	0	0	0	0	0	0	0
Leah Bouterse	28-MAR-17		1	5.4m	1.0	3	1	1	0			0		0	0	0	0	1	0	0	0	0	0	0	1	1	3.64	0.674074	0	0	0	0	0	0	0
Leah Bouterse	28-MAR-17		1	5.4m	1.0	3	1	1	0			0		0	0	0	0	1	0	0	0	0	0	0	1	1	3.45	0.638889	0	0	0	0	0	0	0
Leah Bouterse	28-MAR-17		1	5.4m	1.0	3	1	1	0			0		0	0	0	0	1	0	0	0	0	0	0	1	1	3.04	0.562963	0	0	0	0	0	0	0
Leah Bouterse	28-MAR-17		1	5.4m	1.0	2	0	1	1			0		0	0	0	0	1	0	0	0	0	0	1	0	1	5.01	0.927778	0	0	0	0	0	0	0
Leah Bouterse	28-MAR-17		1	5.4m	1.0	2	0	1	0			0		1	0	0	1	0	0	0	0	0	1	1	0	1	5.15	0.953704	0	0	0	0	0	0	6
Leah Bouterse	28-MAR-17		1	5.4m	1.0	3	1	1	0			0		1	0	0	0	1	0	0	0	0	1	0	1	1	4.72	0.874074	0	0	0	0	0	0	6
Leah Bouterse	28-MAR-17		1	5.4m	1.0	3	1	1	0			0		1	0	0	0	1	0	0	0	0	1	0	1	1	3.85	0.712963	0	0	0	0	0	0	6
Leah Bouterse	28-MAR-17		1	5.4m	1.0	2	0	0	0			0		1	1	0	1	0	0	0	0	0	0	2	0	2	6.31	1.16852	1	0	0	0	1	0	1
Leah Bouterse	28-MAR-17		1	5.4m	1.0	2	0	1	0			0		1	0	0	2	0	0	0	0	0	0	2	0	2	4.68	0.866667	1	0	0	0	1	0	1
Leah Bouterse	28-MAR-17		1	5.4m	1.0	2	0	1	0			0		1	0	0	2	0	0	0	0	0	0	2	0	2	4.3	0.796296	1	0	0	0	1	0	1
Leah Bouterse	28-MAR-17		1	5.4m	1.0	2	0	1	0			0		1	0	0	2	0	0	0	0	0	0	2	0	2	3.51	0.65	1	0	0	0	1	0	1
Leah Bouterse	28-MAR-17		1	5.4m	1.0	3	1	1	0			0		1	0	0	1	1	0	0	0	0	1	1	1	2	5.31	0.983333	1	0	0	0	1	0	6
Leah Bouterse	28-MAR-17		1	5.4m	1.0	3	1	1	0			0		1	0	0	1	1	0	0	0	0	0	1	1	2	5.97	1.10556	1	0	0	0	1	0	6
Leah Bouterse	28-MAR-17		1	5.4m	1.0	3	1	1	0			0		1	0	0	1	1	0	0	0	0	0	1	1	2	5.67	1.05	1	0	0	0	1	0	6
Leah Bouterse	28-MAR-17		1	5.4m	1.0	3	1	1	0			0		1	0	0	1	1	0	0	0	0	0	1	1	2	5.01	0.927778	1	0	0	0	1	0	6
Leah Bouterse	28-MAR-17		1	5.4m	1.0	3	1	1	0			0		1	0	0	1	1	0	0	0	0	0	1	1	2	4.97	0.92037	1	0	0	0	1	0	6
Leah Bouterse	28-MAR-17		1	5.4m	1.0	3	1	1	0			0		1	0	0	1	1	0	0	0	0	0	1	1	2	4.63	0.857407	1	0	0	0	1	0	6
Leah Bouterse	28-MAR-17		1	5.4m	1.0	2	0	1	0			0		1	0	0	1	1	0	0	0	0	0	1	1	2	5.31	0.983333	0	1	0	0	2	0	6
Leah Bouterse	28-MAR-17		1	5.4m	1.0	0	0	0	0			0		1	1	1	0	0	0	0	0	0	0	1	1	2	5.14	0.951852	0	1	0	0	2	0	6
Leah Bouterse	28-MAR-17		1	5.4m	1.0	2	0	1	0			0		1	0	0	1	0	0	0	1	0	0	2	0	2	5.47	1.01296	1	0	0	1	3	3	3
Leah Bouterse	28-MAR-17		1	5.4m	1.0	2	0	1	0			0		1	0	0	1	0	0	0	1	0	0	2	0	2	5.01	0.927778	1	0	0	1	3	3	3
Leah Bouterse	28-MAR-17		1	5.4m	1.0	2	0	1	0			0		1	0	0	1	0	0	0	1	0	0	2	0	2	4.15	0.768519	1	0	0	1	3	3	3
Leah Bouterse	28-MAR-17		1	5.4m	1.0	2	0	1	0			0		1	0	0	1	0	0	0	2	0	0	3	0	3	6.14	1.13704	1	0	0	1	3	3	3
Leah Bouterse	28-MAR-17		1	5.4m	1.0	2	0	1	0			0		1	0	0	1	0	0	0	2	0	0	3	0	3	5.98	1.10741	1	0	0	1	3	3	3
Leah Bouterse	28-MAR-17		1	5.4m	1.0	2	0	1	0			0		1	0	0	1	1	0	0	0	1	1	1	2	3	7.17	1.32778	0	1	0	1	4	3	5
Leah Bouterse	10‎/04/2016	16:45:00	0	7.3m	1	2	0	1	1	2	2	1		0	0	0	1	0	0	0	0	0	0	1	0	1	5.76	1.26736	0	0	0	0	0	0	0
Leah Bouterse	10‎/04/2016	16:45:00	0	7.3m	1	2	0	1	1	2	2	1		0	0	0	1	0	0	0	0	0	0	1	0	1	5.73	1.274	0	0	0	0	0	0	0
Leah Bouterse	10‎/04/2016	16:45:00	0	7.3m	1	2	0	1	1	2	2	1		0	0	0	1	0	0	0	0	0	0	1	0	1	6.6	1.10606	0	0	0	0	0	0	0
Leah Bouterse	10‎/04/2016	16:45:00	0	7.3m	1	2	0	1	1	2	2	1		0	0	0	1	0	0	0	0	0	0	1	0	1	7.2	1.01389	0	0	0	0	0	0	0
Leah Bouterse	10‎/04/2016	16:45:00	0	7.3m	1	2	0	1	1	2	2	1		0	0	0	1	0	0	0	0	0	0	1	0	1	11.89	0.613961	0	0	0	0	0	0	0
Leah Bouterse	10‎/04/2016	16:45:00	0	7.3m	1	2	0	1	1	2	2	1		0	0	0	1	0	0	0	0	0	0	1	0	1	7.5	0.973333	0	0	0	0	0	0	0
Leah Bouterse	10‎/04/2016	16:45:00	0	7.3m	1	2	0	1	1	2	2	1		0	0	0	1	0	0	0	0	0	0	1	0	1	8.52	0.856808	0	0	0	0	0	0	0
Leah Bouterse	10‎/04/2016	16:45:00	0	7.3m	1	2	0	1	1	2	2	1		0	0	0	1	0	0	0	0	0	0	1	0	1	5.26	1.38783	0	0	0	0	0	0	0
Leah Bouterse	10‎/04/2016	16:45:00	0	7.3m	1	2	0	1	1	2	2	1		0	0	0	1	0	0	0	0	0	0	1	0	1	7.17	1.01813	0	0	0	0	0	0	0
Leah Bouterse	10‎/04/2016	16:45:00	0	7.3m	1	2	0	1	1	2	2	1		0	0	0	1	0	0	0	0	0	0	1	0	1	6.25	1.168	0	0	0	0	0	0	0
Leah Bouterse	10‎/04/2016	16:45:00	0	7.3m	1	2	0	1	1	2	2	1		0	0	0	1	0	0	0	0	0	0	1	0	1	6.55	1.1145	0	0	0	0	0	0	0
Leah Bouterse	10‎/04/2016	16:45:00	0	7.3m	1	2	0	1	1	3	2	1		0	0	0	1	0	0	0	0	0	0	1	0	1	6.46	1.13003	0	0	0	0	0	0	0
Leah Bouterse	10‎/04/2016	16:45:00	0	7.3m	1	2	0	1	1	3	2	1		0	0	0	1	0	0	0	0	0	0	1	0	1	7.75	0.941935	0	0	0	0	0	0	0
Leah Bouterse	10‎/04/2016	16:45:00	0	7.3m	1	2	0	1	1	3	2	1		0	0	0	1	0	0	0	0	0	0	1	0	1	8.48	0.860849	0	0	0	0	0	0	0
Leah Bouterse	10‎/04/2016	16:45:00	0	7.3m	1	2	0	1	1	3	2	1		0	0	0	1	0	0	0	0	0	0	1	0	1	6.1	1.19672	0	0	0	0	0	0	0
Leah Bouterse	10‎/04/2016	16:45:00	0	7.3m	1	2	0	1	1	0	2	2		0	0	0	1	0	0	0	0	0	0	1	0	1	6.92	1.05491	0	0	0	0	0	0	0
Leah Bouterse	10‎/04/2016	16:45:00	0	7.3m	1	2	0	1	1	1	2	2		0	0	0	1	0	0	0	0	0	0	1	0	1	6.36	1.1478	0	0	0	0	0	0	0
Leah Bouterse	10‎/04/2016	16:45:00	0	7.3m	1	2	0	1	1	1	2	2		0	0	0	1	0	0	0	0	0	0	1	0	1	6.7	1.08955	0	0	0	0	0	0	0
Leah Bouterse	10‎/04/2016	16:45:00	0	7.3m	1	2	0	1	1	1	2	2		0	0	0	1	0	0	0	0	0	0	1	0	1	7.57	0.964333	0	0	0	0	0	0	0
Leah Bouterse	10‎/04/2016	16:45:00	0	7.3m	1	2	0	1	1	1	2	2		0	0	0	1	0	0	0	0	0	0	1	0	1	6.27	1.16427	0	0	0	0	0	0	0
Leah Bouterse	10‎/04/2016	16:45:00	0	7.3m	1	2	0	1	1	1	2	2		0	0	0	1	0	0	0	0	0	0	1	0	1	6.63	1.10106	0	0	0	0	0	0	0
Leah Bouterse	10‎/04/2016	16:45:00	0	7.3m	1	2	0	1	1	1	2	2		0	0	0	1	0	0	0	0	0	0	1	0	1	8.17	0.893513	0	0	0	0	0	0	0
Leah Bouterse	10‎/04/2016	16:45:00	0	7.3m	1	2	0	1	1	1	2	2		0	0	0	1	0	0	0	0	0	0	1	0	1	7.53	0.969456	0	0	0	0	0	0	0
Leah Bouterse	10‎/04/2016	16:45:00	0	7.3m	1	2	0	1	1	1	2	2		0	0	0	1	0	0	0	0	0	0	1	0	1	8.4	0.869048	0	0	0	0	0	0	0
Leah Bouterse	10‎/04/2016	16:45:00	0	7.3m	1	2	0	1	1	1	2	2		0	0	0	1	0	0	0	0	0	0	1	0	1	8.02	0.910224	0	0	0	0	0	0	0
Leah Bouterse	10‎/04/2016	16:45:00	0	7.3m	1	2	0	1	1	1	2	2		0	0	0	1	0	0	0	0	0	0	1	0	1	5.97	1.22278	0	0	0	0	0	0	0
Leah Bouterse	10‎/04/2016	16:45:00	0	7.3m	1	2	0	1	1	2	2	2		0	0	0	1	0	0	0	0	0	0	1	0	1	8.56	0.852804	0	0	0	0	0	0	0
Leah Bouterse	10‎/04/2016	16:45:00	0	7.3m	1	2	0	1	1	2	2	2		0	0	0	1	0	0	0	0	0	0	1	0	1	5.25	1.39048	0	0	0	0	0	0	0
Leah Bouterse	10‎/04/2016	16:45:00	0	7.3m	1	2	0	1	1	2	2	2		0	0	0	1	0	0	0	0	0	0	1	0	1	9.35	0.780749	0	0	0	0	0	0	0
Leah Bouterse	10‎/04/2016	16:45:00	0	7.3m	1	2	0	1	1	2	2	2		0	0	0	1	0	0	0	0	0	0	1	0	1	8.47	0.861865	0	0	0	0	0	0	0
Leah Bouterse	10‎/04/2016	16:45:00	0	7.3m	1	2	0	1	1	2	2	2		0	0	0	1	0	0	0	0	0	0	1	0	1	6	1.21667	0	0	0	0	0	0	0
Leah Bouterse	10‎/04/2016	16:45:00	0	7.3m	1	2	0	1	1	3	2	2		0	0	0	1	0	0	0	0	0	0	1	0	1	6.52	1.11963	0	0	0	0	0	0	0
Leah Bouterse	10‎/04/2016	16:45:00	0	7.3m	1	2	0	1	1	3	2	2		0	0	0	1	0	0	0	0	0	0	1	0	1	6.07	1.20264	0	0	0	0	0	0	0
Leah Bouterse	10‎/04/2016	16:45:00	0	7.3m	1	2	0	1	1	3	2	2		0	0	0	1	0	0	0	0	0	0	1	0	1	6.08	1.20066	0	0	0	0	0	0	0
Leah Bouterse	10‎/04/2016	16:45:00	0	7.3m	1	2	0	1	1	0	2	3		0	0	0	1	0	0	0	0	0	0	1	0	1	7.32	0.997268	0	0	0	0	0	0	0
Leah Bouterse	10‎/04/2016	16:45:00	0	7.3m	1	2	0	1	1	1	2	3		0	0	0	1	0	0	0	0	0	0	1	0	1	5.92	1.23311	0	0	0	0	0	0	0
Leah Bouterse	10‎/04/2016	16:45:00	0	7.3m	1	2	0	1	1	2	2	3		0	0	0	1	0	0	0	0	0	0	1	0	1	8.33	0.876351	0	0	0	0	0	0	0
Leah Bouterse	10‎/04/2016	16:45:00	0	7.3m	1	2	0	1	1	2	2	3		0	0	0	1	0	0	0	0	0	0	1	0	1	7.4	0.986486	0	0	0	0	0	0	0
Leah Bouterse	10‎/04/2016	16:45:00	0	7.3m	1	3	1	1	1	0	2	1		0	0	0	0	1	0	0	0	0	0	0	1	1	5.8	1.25862	0	0	0	0	0	0	0
Leah Bouterse	10‎/04/2016	16:45:00	0	7.3m	1	3	1	1	1	0	2	1		0	0	0	0	1	0	0	0	0	0	0	1	1	7.48	0.975936	0	0	0	0	0	0	0
Leah Bouterse	10‎/04/2016	16:45:00	0	7.3m	1	3	1	1	1	0	2	1		0	0	0	0	1	0	0	0	0	0	0	1	1	6.65	1.09774	0	0	0	0	0	0	0
Leah Bouterse	10‎/04/2016	16:45:00	0	7.3m	1	3	1	1	1	2	2	1		0	0	0	0	1	0	0	0	0	0	0	1	1	9.45	0.772487	0	0	0	0	0	0	0
Leah Bouterse	10‎/04/2016	16:45:00	0	7.3m	1	3	1	1	1	2	2	1		0	0	0	0	1	0	0	0	0	0	0	1	1	7.32	0.997268	0	0	0	0	0	0	0
Leah Bouterse	10‎/04/2016	16:45:00	0	7.3m	1	3	1	1	1	2	2	1		0	0	0	0	1	0	0	0	0	0	0	1	1	9.68	0.754132	0	0	0	0	0	0	0
Leah Bouterse	10‎/04/2016	16:45:00	0	7.3m	1	3	1	1	1	2	2	1		0	0	0	0	1	0	0	0	0	0	0	1	1	7.45	0.979866	0	0	0	0	0	0	0
Leah Bouterse	10‎/04/2016	16:45:00	0	7.3m	1	3	1	1	1	2	2	1		0	0	0	0	1	0	0	0	0	0	0	1	1	9.25	0.789189	0	0	0	0	0	0	0
Leah Bouterse	10‎/04/2016	16:45:00	0	7.3m	1	3	1	1	1	2	2	1		0	0	0	0	1	0	0	0	0	0	0	1	1	8.17	0.893513	0	0	0	0	0	0	0
Leah Bouterse	10‎/04/2016	16:45:00	0	7.3m	1	3	1	1	1	2	2	1		0	0	0	0	1	0	0	0	0	0	0	1	1	8.7	0.83908	0	0	0	0	0	0	0
Leah Bouterse	10‎/04/2016	16:45:00	0	7.3m	1	3	1	1	1	2	2	1		0	0	0	0	1	0	0	0	0	0	0	1	1	7.48	0.975936	0	0	0	0	0	0	0
Leah Bouterse	10‎/04/2016	16:45:00	0	7.3m	1	3	1	1	1	2	2	1		0	0	0	0	1	0	0	0	0	0	0	1	1	10.55	0.691943	0	0	0	0	0	0	0
Leah Bouterse	10‎/04/2016	16:45:00	0	7.3m	1	3	1	1	1	3	2	1		0	0	0	0	1	0	0	0	0	0	0	1	1	6.98	1.04585	0	0	0	0	0	0	0
Leah Bouterse	10‎/04/2016	16:45:00	0	7.3m	1	3	1	1	1	3	2	1		0	0	0	0	1	0	0	0	0	0	0	1	1	6.1	1.19672	0	0	0	0	0	0	0
Leah Bouterse	10‎/04/2016	16:45:00	0	7.3m	1	3	1	1	1	1	2	2	0	0	0	0	0	1	0	0	0	0	0	0	1	1	9.22	0.791757	0	0	0	0	0	0	0
Leah Bouterse	10‎/04/2016	16:45:00	0	7.3m	1	1	1	0	1	0	2	2		0	0	1	0	0	0	0	0	0	0	0	1	1	9.58	0.762004	0	0	0	0	0	0	0
Leah Bouterse	10‎/04/2016	16:45:00	0	7.3m	1	3	1	1	1	0	2	2		0	0	0	0	1	0	0	0	0	0	0	1	1	9.53	0.766002	0	0	0	0	0	0	0
Leah Bouterse	10‎/04/2016	16:45:00	0	7.3m	1	2	1	1	1	1	2	2		0	0	0	1	0	0	0	0	0	0	1	0	1	5.82	1.2543	0	0	0	0	0	0	0
Leah Bouterse	10‎/04/2016	16:45:00	0	7.3m	1	3	1	1	1	1	2	2		0	0	0	0	1	0	0	0	0	0	0	1	1	9	0.811111	0	0	0	0	0	0	0
Leah Bouterse	10‎/04/2016	16:45:00	0	7.3m	1	4	1	2	1	1	2	2		0	0	0	0	0	1	0	0	0	0	1	0	1	7.9	0.924051	0	0	0	0	0	0	0
Leah Bouterse	10‎/04/2016	16:45:00	0	7.3m	1	5	1	2	1	1	2	2		0	0	0	0	0	0	1	0	0	0	0	1	1	5.28	1.38258	0	0	0	0	0	0	0
Leah Bouterse	10‎/04/2016	16:45:00	0	7.3m	1	1	1	0	1	2	2	2		0	0	1	0	0	0	0	0	0	0	0	1	1	11.67	0.625536	0	0	0	0	0	0	0
Leah Bouterse	10‎/04/2016	16:45:00	0	7.3m	1	3	1	1	1	2	2	2		0	0	0	0	1	0	0	0	0	0	0	1	1	6.65	1.09774	0	0	0	0	0	0	0
Leah Bouterse	10‎/04/2016	16:45:00	0	7.3m	1	3	1	1	1	2	2	2		0	0	0	0	1	0	0	0	0	0	0	1	1	7.13	1.02384	0	0	0	0	0	0	0
Leah Bouterse	10‎/04/2016	16:45:00	0	7.3m	1	3	1	1	1	2	2	2		0	0	0	0	1	0	0	0	0	0	0	1	1	6.87	1.06259	0	0	0	0	0	0	0
Leah Bouterse	10‎/04/2016	16:45:00	0	7.3m	1	3	1	1	1	2	2	2		0	0	0	0	1	0	0	0	0	0	0	1	1	8.13	0.897909	0	0	0	0	0	0	0
Leah Bouterse	10‎/04/2016	16:45:00	0	7.3m	1	3	1	1	1	2	2	2		0	0	0	0	1	0	0	0	0	0	0	1	1	6.73	1.0847	0	0	0	0	0	0	0
Leah Bouterse	10‎/04/2016	16:45:00	0	7.3m	1	3	1	1	1	2	2	2		0	0	0	0	1	0	0	0	0	0	0	1	1	8.98	0.812918	0	0	0	0	0	0	0
Leah Bouterse	10‎/04/2016	16:45:00	0	7.3m	1	3	1	1	1	3	2	2		0	0	0	0	1	0	0	0	0	0	0	1	1	8	0.9125	0	0	0	0	0	0	0
Leah Bouterse	10‎/04/2016	16:45:00	0	7.3m	1	3	1	1	1	3	2	2		0	0	0	0	1	0	0	0	0	0	0	1	1	10.22	0.714286	0	0	0	0	0	0	0
Leah Bouterse	10‎/04/2016	16:45:00	0	7.3m	1	3	1	1	1	3	2	2		0	0	0	0	1	0	0	0	0	0	0	1	1	7.88	0.926396	0	0	0	0	0	0	0
Leah Bouterse	10‎/04/2016	16:45:00	0	7.3m	1	3	1	1	1	3	2	2		0	0	0	0	1	0	0	0	0	0	0	1	1	8.2	0.890244	0	0	0	0	0	0	0
Leah Bouterse	10‎/04/2016	16:45:00	0	7.3m	1	3	1	1	1	3	2	2		0	0	0	0	1	0	0	0	0	0	0	1	1	5.93	1.23103	0	0	0	0	0	0	0
Leah Bouterse	10‎/04/2016	16:45:00	0	7.3m	1	3	1	1	1	3	2	2		0	0	0	0	1	0	0	0	0	0	0	1	1	9.45	0.772487	0	0	0	0	0	0	0
Leah Bouterse	10‎/04/2016	16:45:00	0	7.3m	1	3	1	1	1	3	2	2		0	0	0	0	1	0	0	0	0	0	0	1	1	7.02	1.03989	0	0	0	0	0	0	0
Leah Bouterse	10‎/04/2016	16:45:00	0	7.3m	1	3	1	1	1	3	2	2		0	0	0	0	1	0	0	0	0	0	0	1	1	7.1	1.02817	0	0	0	0	0	0	0
Leah Bouterse	10‎/04/2016	16:45:00	0	7.3m	1	3	1	1	1	0	2	3		0	0	0	0	1	0	0	0	0	0	0	1	1	8.93	0.817469	0	0	0	0	0	0	0
Leah Bouterse	10‎/04/2016	16:45:00	0	7.3m	1	3	1	1	1	1	2	3		0	0	0	0	1	0	0	0	0	0	0	1	1	9.08	0.803965	0	0	0	0	0	0	0
Leah Bouterse	10‎/04/2016	16:45:00	0	7.3m	1	7	1	3	1	1	2	1		0	0	0	0	0	0	0	0	1	0	0	1	1	7.35	0.993197	0	0	0	1	7	2	0
Leah Bouterse	10‎/04/2016	16:45:00	0	7.3m	1	3	1	1	1	2	2	2		1	0	0	0	1	0	0	0	0	0	0	1	1	8.98	0.812918	0	0	0	0	0	0	6
Leah Bouterse	10‎/04/2016	16:45:00	0	7.3m	1	2	0	1	0			0		1	0	0	2	0	0	0	0	0	0	2	0	2	8.87	0.822999	1	0	0	0	1	0	1
Leah Bouterse	10‎/04/2016	16:45:00	0	7.3m	1	2	0	1	1	2	1	1		1	0	0	2	0	0	0	0	0	0	2	0	2	8.9	0.820225	1	0	0	0	1	0	1
Leah Bouterse	10‎/04/2016	16:45:00	0	7.3m	1	2	0	1	1	2	1	2		1	0	0	2	0	0	0	0	0	0	2	0	2	6.52	1.11963	1	0	0	0	1	0	1
Leah Bouterse	10‎/04/2016	16:45:00	0	7.3m	1	4	0	2	1	2	1	2		1	0	0	0	0	2	0	0	0	0	2	0	2	6.57	1.11111	1	0	0	0	1	0	1
Leah Bouterse	10‎/04/2016	16:45:00	0	7.3m	1	4	0	2	1	2	1	2		1	0	0	0	0	4	0	0	0	0	4	0	4	6.18	1.18123	1	0	0	0	1	0	1
Leah Bouterse	10‎/04/2016	16:45:00	0	7.3m	1	2	0	1	1	1	2	1		1	0	0	2	0	0	0	0	0	0	2	0	2	6.98	1.04585	1	0	0	0	1	0	1
Leah Bouterse	10‎/04/2016	16:45:00	0	7.3m	1	2	0	1	1	1	2	1		1	0	0	2	0	0	0	0	0	0	2	0	2	10.23	0.713587	1	0	0	0	1	0	1
Leah Bouterse	10‎/04/2016	16:45:00	0	7.3m	1	2	0	1	1	2	2	1		1	0	0	2	0	0	0	0	0	0	2	0	2	8.9	0.820225	1	0	0	0	1	0	1
Leah Bouterse	10‎/04/2016	16:45:00	0	7.3m	1	2	0	1	1	2	2	1		1	0	0	2	0	0	0	0	0	0	2	0	2	10.47	0.69723	1	0	0	0	1	0	1
Leah Bouterse	10‎/04/2016	16:45:00	0	7.3m	1	2	0	1	1	2	2	1		1	0	0	2	0	0	0	0	0	0	2	0	2	6.23	1.17175	1	0	0	0	1	0	1
Leah Bouterse	10‎/04/2016	16:45:00	0	7.3m	1	2	0	1	1	2	2	1		1	0	0	2	0	0	0	0	0	0	2	0	2	6.77	1.07829	1	0	0	0	1	0	1
Leah Bouterse	10‎/04/2016	16:45:00	0	7.3m	1	2	0	1	1	2	2	1		1	0	0	2	0	0	0	0	0	0	2	0	2	10.25	0.712195	1	0	0	0	1	0	1
Leah Bouterse	10‎/04/2016	16:45:00	0	7.3m	1	2	0	1	1	3	2	1		1	0	0	2	0	0	0	0	0	0	2	0	2	7.32	0.997268	1	0	0	0	1	0	1
Leah Bouterse	10‎/04/2016	16:45:00	0	7.3m	1	4	0	2	1	1	2	2		1	0	0	0	0	2	0	0	0	0	2	0	2	5.68	1.28521	1	0	0	0	1	0	1
Leah Bouterse	10‎/04/2016	16:45:00	0	7.3m	1	2	0	1	1	2	2	2		1	0	0	2	0	0	0	0	0	0	2	0	2	8.88	0.822072	1	0	0	0	1	0	1
Leah Bouterse	10‎/04/2016	16:45:00	0	7.3m	1	2	0	1	1	3	2	2		1	0	0	2	0	0	0	0	0	0	2	0	2	6.55	1.1145	1	0	0	0	1	0	1
Leah Bouterse	10‎/04/2016	16:45:00	0	7.3m	1	2	0	1	1	0	2	3		1	0	0	2	0	0	0	0	0	0	2	0	2	8.82	0.827664	1	0	0	0	1	0	1
Leah Bouterse	10‎/04/2016	16:45:00	0	7.3m	1	2	0	1	1	3	2	1		1	0	0	3	0	0	0	0	0	0	3	0	3	8.97	0.813824	1	0	0	0	1	0	1
Leah Bouterse	10‎/04/2016	16:45:00	0	7.3m	1	2	0	1	1	2	2	2		1	0	0	3	0	0	0	0	0	0	3	0	3	8.27	0.882709	1	0	0	0	1	0	1
Leah Bouterse	10‎/04/2016	16:45:00	0	7.3m	1	6	0	2	1	2	2	2		1	0	0	0	0	4	0	0	0	0	4	0	4	10.93	0.667887	1	0	0	0	1	0	1
Leah Bouterse	10‎/04/2016	16:45:00	0	7.3m	1	3	1	1	1	1	2	2		1	0	0	1	1	0	0	0	0	0	1	1	2	10.91	0.669111	1	0	0	0	1	0	6
Leah Bouterse	10‎/04/2016	16:45:00	0	7.3m	1	3	1	1	1	2	2	2		1	0	0	1	1	0	0	0	0	0	1	1	2	8.3	0.879518	1	0	0	0	1	0	6
Leah Bouterse	10‎/04/2016	16:45:00	0	7.3m	1	3	1	1	1	2	2	1		1	0	0	2	1	0	0	0	0	0	2	1	3	7.54	0.96817	1	0	0	0	1	0	6
Leah Bouterse	10‎/04/2016	16:45:00	0	7.3m	1	3	1	1	1	0	1	1		1	0	0	0	2	0	0	0	0	0	0	2	2	9.88	0.738866	0	1	0	0	2	0	2
Leah Bouterse	10‎/04/2016	16:45:00	0	7.3m	1	5	1	2	1	2	1	2		1	0	0	0	0	0	4	0	0	0	0	4	4	5.95	1.22689	0	1	0	0	2	0	2
Leah Bouterse	10‎/04/2016	16:45:00	0	7.3m	1	2	0	1	1	1	2	2		1	0	0	1	1	0	0	0	0	0	1	1	2	8.75	0.834286	0	1	0	0	2	0	6
Leah Bouterse	10‎/04/2016	16:45:00	0	7.3m	1	2	0	1	1	1	2	2		1	0	0	1	1	0	0	0	0	0	1	1	2	10.35	0.705314	0	1	0	0	2	0	6
Leah Bouterse	10‎/04/2016	16:45:00	0	7.3m	1	2	0	1	1	1	2	2		1	0	0	1	1	0	0	0	0	0	1	1	2	12.63	0.577989	0	1	0	0	2	0	6
Leah Bouterse	10‎/04/2016	16:45:00	0	7.3m	1	2	0	1	1	1	2	2		1	0	0	1	1	0	0	0	0	0	1	1	2	11.33	0.644307	0	1	0	0	2	0	6
Leah Bouterse	10‎/04/2016	16:45:00	0	7.3m	1	1	1	0	1	0	2	1		1	0	2	0	0	0	0	0	0	0	0	2	2	13.09	0.557678	0	1	0	0	2	0	2
Leah Bouterse	10‎/04/2016	16:45:00	0	7.3m	1	3	1	1	1	0	2	1		1	0	0	0	2	0	0	0	0	0	0	2	2	8.32	0.877404	0	1	0	0	2	0	2
Leah Bouterse	10‎/04/2016	16:45:00	0	7.3m	1	3	1	1	1	2	2	1		1	0	0	0	2	0	0	0	0	0	0	2	2	7.62	0.958005	0	1	0	0	2	0	2
Leah Bouterse	10‎/04/2016	16:45:00	0	7.3m	1	3	1	1	1	2	2	1		1	0	0	0	2	0	0	0	0	0	0	2	2	12.25	0.595918	0	1	0	0	2	0	2
Leah Bouterse	10‎/04/2016	16:45:00	0	7.3m	1	3	1	1	1	2	2	1		1	0	0	0	2	0	0	0	0	0	0	2	2	11.09	0.658251	0	1	0	0	2	0	2
Leah Bouterse	10‎/04/2016	16:45:00	0	7.3m	1	3	1	1	1	2	2	1		1	0	0	0	2	0	0	0	0	0	0	2	2	13.35	0.546816	0	1	0	0	2	0	2
Leah Bouterse	10‎/04/2016	16:45:00	0	7.3m	1	3	1	1	1	2	2	1		1	0	0	0	2	0	0	0	0	0	0	2	2	8.47	0.861865	0	1	0	0	2	0	2
Leah Bouterse	10‎/04/2016	16:45:00	0	7.3m	1	3	1	1	1	3	2	1		1	0	0	0	2	0	0	0	0	0	0	2	2	11.2	0.651786	0	1	0	0	2	0	2
Leah Bouterse	10‎/04/2016	16:45:00	0	7.3m	1	3	1	1	1	1	2	2		1	0	0	0	2	0	0	0	0	0	0	2	2	9.27	0.787487	0	1	0	0	2	0	2
Leah Bouterse	10‎/04/2016	16:45:00	0	7.3m	1	5	1	2	1	1	2	2		1	0	0	0	0	0	2	0	0	0	0	2	2	9.52	0.766807	0	1	0	0	2	0	2
Leah Bouterse	10‎/04/2016	16:45:00	0	7.3m	1	5	1	2	1	1	2	2		1	0	0	0	0	0	2	0	0	0	0	2	2	8.72	0.837156	0	1	0	0	2	0	2
Leah Bouterse	10‎/04/2016	16:45:00	0	7.3m	1	5	1	2	1	1	2	2		1	0	0	0	0	0	2	0	0	0	0	2	2	8.1	0.901235	0	1	0	0	2	0	2
Leah Bouterse	10‎/04/2016	16:45:00	0	7.3m	1	1	1	0	1	2	2	2		1	0	0	0	2	0	0	0	0	0	0	2	2	9.95	0.733668	0	1	0	0	2	0	2
Leah Bouterse	10‎/04/2016	16:45:00	0	7.3m	1	3	1	1	1	2	2	2		1	0	0	0	2	0	0	0	0	0	0	2	2	10.02	0.728543	0	1	0	0	2	0	2
Leah Bouterse	10‎/04/2016	16:45:00	0	7.3m	1	3	1	1	1	3	2	2		1	0	0	0	2	0	0	0	0	0	0	2	2	9.48	0.770042	0	1	0	0	2	0	2
Leah Bouterse	10‎/04/2016	16:45:00	0	7.3m	1	3	1	1	1	3	2	2		1	0	0	0	2	0	0	0	0	0	0	2	2	8.7	0.83908	0	1	0	0	2	0	2
Leah Bouterse	10‎/04/2016	16:45:00	0	7.3m	1	3	1	1	1	3	2	2		1	0	0	0	2	0	0	0	0	0	0	2	2	8.23	0.886999	0	1	0	0	2	0	2
Leah Bouterse	10‎/04/2016	16:45:00	0	7.3m	1	3	1	1	1	3	2	3		1	0	0	0	2	0	0	0	0	0	0	2	2	12.43	0.587289	0	1	0	0	2	0	2
Leah Bouterse	10‎/04/2016	16:45:00	0	7.3m	1	3	1	1	1	1	2	2		1	0	0	0	3	0	0	0	0	0	0	3	3	14.72	0.495924	0	1	0	0	2	0	2
Leah Bouterse	10‎/04/2016	16:45:00	0	7.3m	1	5	1	2	1	1	2	2		1	0	0	0	0	0	3	0	0	0	0	3	3	6.55	1.1145	0	1	0	0	2	0	2
Leah Bouterse	10‎/04/2016	16:45:00	0	7.3m	1	3	1	1	1	2	2	2		1	0	0	0	3	0	0	0	0	0	0	3	3	10.47	0.69723	0	1	0	0	2	0	2
Leah Bouterse	10‎/04/2016	16:45:00	0	7.3m	1	5	1	2	1	2	2	2		1	0	0	0	0	0	3	0	0	0	0	3	3	8.35	0.874251	0	1	0	0	2	0	2
Leah Bouterse	10‎/04/2016	16:45:00	0	7.3m	1	3	1	1	1	2	2	1		1	0	0	0	4	0	0	0	0	0	0	4	4	11.12	0.656475	0	1	0	0	2	0	2
Leah Bouterse	10‎/04/2016	16:45:00	0	7.3m	1	3	1	1	1	1	2	2		1	0	0	0	4	0	0	0	0	0	0	4	4	9.9	0.737374	0	1	0	0	2	0	2
Leah Bouterse	10‎/04/2016	16:45:00	0	7.3m	1	5	1	2	1	1	2	2		1	0	0	0	0	0	4	0	0	0	0	4	4	8.02	0.910224	0	1	0	0	2	0	2
Leah Bouterse	10‎/04/2016	16:45:00	0	7.3m	1	3	1	1	1	2	0	3	1	1	0	0	0	1	0	0	1	0	0	1	1	2	11.03	0.661831	1	0	0	1	3	3	4
Leah Bouterse	10‎/04/2016	16:45:00	0	7.3m	1	3	1	1	1	0	1	1		1	0	0	0	1	0	0	1	0	0	1	1	2	7.52	0.970745	1	0	0	1	3	2	4
Leah Bouterse	10‎/04/2016	16:45:00	0	7.3m	1	3	1	1	1	1	2	1		1	0	0	0	1	0	0	1	0	0	1	1	2	7.81	0.934699	1	0	0	1	3	2	4
Leah Bouterse	10‎/04/2016	16:45:00	0	7.3m	1	3	1	1	1	1	2	2		1	0	0	0	1	0	0	1	0	0	1	1	2	11.15	0.654709	1	0	0	1	3	2	4
Leah Bouterse	10‎/04/2016	16:45:00	0	7.3m	1	3	1	1	1	2	2	2		1	0	0	0	1	0	0	1	0	0	1	1	2	10.92	0.668498	1	0	0	1	3	2	4
Leah Bouterse	10‎/04/2016	16:45:00	0	7.3m	1	3	1	1	1	3	2	2		1	0	0	0	1	0	0	1	0	0	1	1	2	7.92	0.921717	1	0	0	1	3	2	4
Leah Bouterse	10‎/04/2016	16:45:00	0	7.3m	1	3	1	1	1	1	0	2	0	1	0	0	0	2	0	0	0	1	0	0	3	3	9.65	0.756477	0	1	0	1	4	3	4
Leah Bouterse	10‎/04/2016	16:45:00	0	7.3m	1	3	1	1	1	1	0	2	0	1	0	0	0	1	0	1	0	1	0	0	3	3	10.05	0.726368	0	1	0	1	4	3	4
Leah Bouterse	10‎/04/2016	16:45:00	0	7.3m	1	3	1	1	1	2	1	2		1	0	0	0	1	0	0	0	1	0	0	2	2	8.27	0.882709	0	1	0	1	4	2	4
Leah Bouterse	10‎/04/2016	16:45:00	0	7.3m	1	3	1	1	1	1	2	2		1	0	0	0	1	0	0	0	1	0	0	2	2	10.05	0.726368	0	1	0	1	4	2	4
Leah Bouterse	10‎/04/2016	16:45:00	0	7.3m	1	3	1	1	1	3	2	2		1	0	0	0	1	0	0	0	1	0	0	2	2	9.47	0.770855	0	1	0	1	4	2	4
Leah Bouterse	10‎/04/2016	16:45:00	0	7.3m	1	4	0	2	1	0	0	3	1	1	0	0	0	1	1	0	1	0	0	2	1	3	8.92	0.818386	0	0	1	1	5	3	5
Leah Bouterse	10‎/04/2016	16:45:00	0	7.3m	1	6	0	3	1	1	2	1		1	0	0	0	0	0	0	2	0	0	2	0	2	4.73	1.54334	1	0	0	1	7	2	7
Leah Bouterse	10‎/04/2016	16:45:00	0	7.3m	1	7	1	3	1	1	2	2		1	0	0	0	0	0	0	0	3	0	0	3	3	8.6	0.848837	0	1	0	1	7	2	7
Leah Bouterse	10‎/04/2016	16:45:00	0	7.3m	1	3	0	1	1	0	0	2	0	0	0	0	0	1	0	0	0	0	0	0	1	1	8.32	0.877404	0	0	0	1	0	1	0
Leah Bouterse	10‎/04/2016	16:45:00	0	7.3m	1	3	1	1	1	0	0	2	0	0	0	0	0	1	0	0	0	0	0	0	1	1	10.33	0.70668	0	0	0	1	0	1	0
Leah Bouterse	10‎/04/2016	16:45:00	0	7.3m	1	3	1	1	1	0	0	2	0	0	0	0	0	1	0	0	0	0	0	0	1	1	11.92	0.612416	0	0	0	1	0	1	0
Leah Bouterse	10‎/04/2016	16:45:00	0	7.3m	1	3	1	1	1	0	0	2	0	0	0	0	0	1	0	0	0	0	0	0	1	1	9.65	0.756477	0	0	0	1	0	1	0
Leah Bouterse	10‎/04/2016	16:45:00	0	7.3m	1	3	1	1	1	1	0	2	0	0	0	0	0	1	0	0	0	0	0	0	1	1	7.12	1.02528	0	0	0	1	0	1	0
Leah Bouterse	10‎/04/2016	16:45:00	0	7.3m	1	3	1	1	1	1	0	2	0	0	0	0	0	1	0	0	0	0	0	0	1	1	9	0.811111	0	0	0	1	0	1	0
Leah Bouterse	10‎/04/2016	16:45:00	0	7.3m	1	3	1	1	1	1	0	2	0	0	0	0	0	1	0	0	0	0	0	0	1	1	9.48	0.770042	0	0	0	1	0	1	0
Leah Bouterse	10‎/04/2016	16:45:00	0	7.3m	1	3	1	1	1	1	0	2	0	0	0	0	0	1	0	0	0	0	0	0	1	1	9.92	0.735887	0	0	0	1	0	1	0
Leah Bouterse	10‎/04/2016	16:45:00	0	7.3m	1	3	1	1	1	1	0	2	0	0	0	0	0	1	0	0	0	0	0	0	1	1	7.98	0.914787	0	0	0	1	0	1	0
Leah Bouterse	10‎/04/2016	16:45:00	0	7.3m	1	3	1	1	1	1	0	2	0	0	0	0	0	1	0	0	0	0	0	0	1	1	6.97	1.04735	0	0	0	1	0	1	0
Leah Bouterse	10‎/04/2016	16:45:00	0	7.3m	0	3	1	1	1	2	0	2	0	0	0	0	0	1	0	0	0	0	0	0	1	1	10.53	0.693257	0	0	0	1	0	1	0
Leah Bouterse	10‎/04/2016	16:45:00	0	7.3m	1	3	1	1	1	0	0	3	1	0	0	0	0	1	0	0	0	0	0	0	1	1	7.93	0.920555	0	0	0	1	0	1	0
Leah Bouterse	10‎/04/2016	16:45:00	0	7.3m	1	2	0	1	1	2	1			0	0	0	1	0	0	0	0	0	0	1	0	1	7.45	0.979866	0	0	0	0	0	0	0
Leah Bouterse	10‎/04/2016	16:45:00	0	7.3m	0	2	0	1	1	2	1	1		0	0	0	1	0	0	0	0	0	0	1	0	1	6.27	1.16427	0	0	0	0	0	0	0
Leah Bouterse	10‎/04/2016	16:45:00	0	7.3m	1	2	0	1	1	2	1	1		0	0	0	1	0	0	0	0	0	0	1	0	1	8.6	0.848837	0	0	0	0	0	0	0
Leah Bouterse	10‎/04/2016	16:45:00	0	7.3m	1	2	0	1	1	2	1	2		0	0	0	1	0	0	0	0	0	0	1	0	1	7.77	0.939511	0	0	0	0	0	0	0
Leah Bouterse	10‎/04/2016	16:45:00	0	7.3m	1	3	1	1	1	0	1	1		0	0	0	0	1	0	0	0	0	0	0	1	1	9.2	0.793478	0	0	0	0	0	0	0
Leah Bouterse	10‎/04/2016	16:45:00	0	7.3m	1	3	1	1	1	0	1	1		0	0	0	0	1	0	0	0	0	0	0	1	1	10.18	0.717092	0	0	0	0	0	0	0
Leah Bouterse	10‎/04/2016	16:45:00	0	7.3m	1	3	1	1	1	2	1	1		0	0	0	0	1	0	0	0	0	0	0	1	1	7.2	1.01389	0	0	0	0	0	0	0
Leah Bouterse	10‎/04/2016	16:45:00	0	7.3m	1	3	1	1	1	2	1	1		0	0	0	0	1	0	0	0	0	0	0	1	1	6.5	1.12308	0	0	0	0	0	0	0
Leah Bouterse	10‎/04/2016	16:45:00	0	7.3m	1	3	1	1	1	2	1	2		0	0	0	0	1	0	0	0	0	0	0	1	1	9.43	0.774125	0	0	0	0	0	0	0
Leah Bouterse	10‎/04/2016	16:45:00	0	7.3m	1	3	1	1	1	2	1	2		0	0	0	0	1	0	0	0	0	0	0	1	1	11.72	0.622867	0	0	0	0	0	0	0
Leah Bouterse	10‎/04/2016	16:45:00	0	7.3m	1	2	0	1	1	1	2	1		0	0	0	1	0	0	0	0	0	0	1	0	1	5.08	1.43701	0	0	0	0	0	0	0
Leah Bouterse	10‎/04/2016	16:45:00	0	7.3m	1	2	0	1	1	1	2	1		0	0	0	1	0	0	0	0	0	0	1	0	1	8.27	0.882709	0	0	0	0	0	0	0
Leah Bouterse	10‎/04/2016	16:45:00	0	7.3m	1	2	0	1	1	1	2	1		0	0	0	1	0	0	0	0	0	0	1	0	1	8.12	0.899015	0	0	0	0	0	0	0
Leah Bouterse	10‎/04/2016	16:45:00	0	7.3m	1	2	0	1	1	1	2	1		0	0	0	1	0	0	0	0	0	0	1	0	1	7.38	0.98916	0	0	0	0	0	0	0
Leah Bouterse	10‎/04/2016	16:45:00	0	7.3m	1	2	0	1	1	1	2	1		0	0	0	1	0	0	0	0	0	0	1	0	1	8.02	0.910224	0	0	0	0	0	0	0
Leah Bouterse	10‎/04/2016	16:45:00	0	7.3m	1	2	0	1	1	1	2	1		0	0	0	1	0	0	0	0	0	0	1	0	1	7	1.04286	0	0	0	0	0	0	0
Leah Bouterse	11‎/03/2016	12:00:00	0	7.3m	0	3	1	1	1	2	1	1		0	0	0	0	1	0	0	0	0	0	0	1	1	7.85	0.929936	0	0	0	0	0	0	0
Leah Bouterse	11‎/03/2016	12:00:00	0	7.3m	0	3	1	1	1	2	1	1		0	0	0	0	1	0	0	0	0	0	0	1	1	7.83	0.932312	0	0	0	0	0	0	0
Leah Bouterse	11‎/03/2016	12:00:00	0	7.3m	0	3	1	1	1	2	1	1		0	0	0	0	1	0	0	0	0	0	0	1	1	8.18	0.892421	0	0	0	0	0	0	0
Leah Bouterse	11‎/03/2016	12:00:00	0	7.3m	0	3	1	1	1	2	1	1		0	0	0	0	1	0	0	0	0	0	0	1	1	7.08	1.03107	0	0	0	0	0	0	0
Leah Bouterse	11‎/03/2016	12:00:00	0	7.3m	0	3	1	1	1	2	1	1		0	0	0	0	1	0	0	0	0	0	0	1	1	7.23	1.00968	0	0	0	0	0	0	0
Leah Bouterse	11‎/03/2016	12:00:00	0	7.3m	0	3	1	1	1	2	1	1		0	0	0	0	1	0	0	0	0	0	0	1	1	8.47	0.861865	0	0	0	0	0	0	0
Leah Bouterse	11‎/03/2016	12:00:00	0	7.3m	0	3	1	1	1	2	1	1		0	0	0	0	1	0	0	0	0	0	0	1	1	8.62	0.846868	0	0	0	0	0	0	0
Leah Bouterse	11‎/03/2016	12:00:00	0	7.3m	0	3	1	1	1	3	1	1		0	0	0	0	1	0	0	0	0	0	0	1	1	9.05	0.80663	0	0	0	0	0	0	0
Leah Bouterse	11‎/03/2016	12:00:00	0	7.3m	0	3	1	1	1	0	1	2		0	0	0	0	1	0	0	0	0	0	0	1	1	6.77	1.07829	0	0	0	0	0	0	0
Leah Bouterse	11‎/03/2016	12:00:00	0	7.3m	0	3	1	1	1	0	1	2		0	0	0	0	1	0	0	0	0	0	0	1	1	9.13	0.799562	0	0	0	0	0	0	0
Leah Bouterse	11‎/03/2016	12:00:00	0	7.3m	0	3	1	1	1	0	1	2		0	0	0	0	1	0	0	0	0	0	0	1	1	5.76	1.26736	0	0	0	0	0	0	0
Leah Bouterse	11‎/03/2016	12:00:00	0	7.3m	0	3	1	1	1	2	1	2		0	0	0	0	1	0	0	0	0	0	0	1	1	7.27	1.00413	0	0	0	0	0	0	0
Leah Bouterse	11‎/03/2016	12:00:00	0	7.3m	0	3	1	1	1	2	1	2		0	0	0	0	1	0	0	0	0	0	0	1	1	7.28	1.00275	0	0	0	0	0	0	0
Leah Bouterse	11‎/03/2016	12:00:00	0	7.3m	0	3	1	1	1	2	1	2		0	0	0	0	1	0	0	0	0	0	0	1	1	6.75	1.08148	0	0	0	0	0	0	0
Leah Bouterse	11‎/03/2016	12:00:00	0	7.3m	0	3	1	1	1	2	1	2		0	0	0	0	1	0	0	0	0	0	0	1	1	10.47	0.69723	0	0	0	0	0	0	0
Leah Bouterse	11‎/03/2016	12:00:00	0	7.3m	0	3	1	1	1	2	1	2		0	0	0	0	1	0	0	0	0	0	0	1	1	8.22	0.888078	0	0	0	0	0	0	0
Leah Bouterse	11‎/03/2016	12:00:00	0	7.3m	0	3	1	1	1	2	1	2		0	0	0	0	1	0	0	0	0	0	0	1	1	10.1	0.722772	0	0	0	0	0	0	0
Leah Bouterse	11‎/03/2016	12:00:00	0	7.3m	0	3	1	1	1	2	1	2		0	0	0	0	1	0	0	0	0	0	0	1	1	8.13	0.897909	0	0	0	0	0	0	0
Leah Bouterse	11‎/03/2016	12:00:00	0	7.3m	0	3	1	1	1	2	1	2		0	0	0	0	1	0	0	0	0	0	0	1	1	6.98	1.04585	0	0	0	0	0	0	0
Leah Bouterse	11‎/03/2016	12:00:00	0	7.3m	0	3	1	1	1	2	1	2		0	0	0	0	1	0	0	0	0	0	0	1	1	7.95	0.918239	0	0	0	0	0	0	0
Leah Bouterse	11‎/03/2016	12:00:00	0	7.3m	0	3	1	1	1	2	1	2		0	0	0	0	1	0	0	0	0	0	0	1	1	10.7	0.682243	0	0	0	0	0	0	0
Leah Bouterse	11‎/03/2016	12:00:00	0	7.3m	0	3	1	1	1	2	1	2		0	0	0	0	1	0	0	0	0	0	0	1	1	7.78	0.938303	0	0	0	0	0	0	0
Leah Bouterse	11‎/03/2016	12:00:00	0	7.3m	0	3	1	1	1	2	1	3		0	0	0	0	1	0	0	0	0	0	0	1	1	7.5	0.973333	0	0	0	0	0	0	0
Leah Bouterse	11‎/03/2016	12:00:00	0	7.3m	0	2	0	1	1	0	2	1		0	0	0	1	0	0	0	0	0	0	1	0	1	8.91	0.819304	0	0	0	0	0	0	0
Leah Bouterse	11‎/03/2016	12:00:00	0	7.3m	0	2	0	1	1	0	2	1		0	0	0	1	0	0	0	0	0	0	1	0	1	8.91	0.819304	0	0	0	0	0	0	0
Leah Bouterse	11‎/03/2016	12:00:00	0	7.3m	0	2	0	1	1	0	2	1		0	0	0	1	0	0	0	0	0	0	1	0	1	6.27	1.16427	0	0	0	0	0	0	0
Leah Bouterse	11‎/03/2016	12:00:00	0	7.3m	0	2	0	1	1	1	2	1		0	0	0	1	0	0	0	0	0	0	1	0	1	8.18	0.892421	0	0	0	0	0	0	0
Leah Bouterse	11‎/03/2016	12:00:00	0	7.3m	0	2	0	1	1	1	2	1		0	0	0	1	0	0	0	0	0	0	1	0	1	7.67	0.95176	0	0	0	0	0	0	0
Leah Bouterse	11‎/03/2016	12:00:00	0	7.3m	0	2	0	1	1	1	2	1		0	0	0	1	0	0	0	0	0	0	1	0	1	6.95	1.05036	0	0	0	0	0	0	0
Leah Bouterse	11‎/03/2016	12:00:00	0	7.3m	0	2	0	1	1	2	2	1		0	0	0	1	0	0	0	0	0	0	1	0	1	8.11	0.900123	0	0	0	0	0	0	0
Leah Bouterse	11‎/03/2016	12:00:00	0	7.3m	0	2	0	1	1	2	2	1		0	0	0	1	0	0	0	0	0	0	1	0	1	6.21	1.17552	0	0	0	0	0	0	0
Leah Bouterse	11‎/03/2016	12:00:00	0	7.3m	0	2	0	1	1	2	2	1		0	0	0	1	0	0	0	0	0	0	1	0	1	6.21	1.17552	0	0	0	0	0	0	0
Leah Bouterse	11‎/03/2016	12:00:00	0	7.3m	0	2	0	1	1	2	2	1		0	0	0	1	0	0	0	0	0	0	1	0	1	10.68	0.683521	0	0	0	0	0	0	0
Leah Bouterse	11‎/03/2016	12:00:00	0	7.3m	0	2	0	1	1	2	2	1		0	0	0	1	0	0	0	0	0	0	1	0	1	7.47	0.977242	0	0	0	0	0	0	0
Leah Bouterse	11‎/03/2016	12:00:00	0	7.3m	0	2	0	1	1	2	2	1		0	0	0	1	0	0	0	0	0	0	1	0	1	6.06	1.20462	0	0	0	0	0	0	0
Leah Bouterse	11‎/03/2016	12:00:00	0	7.3m	0	2	0	1	1	2	2	1		0	0	0	1	0	0	0	0	0	0	1	0	1	8.33	0.876351	0	0	0	0	0	0	0
Leah Bouterse	11‎/03/2016	12:00:00	0	7.3m	0	2	0	1	1	2	2	1		0	0	0	1	0	0	0	0	0	0	1	0	1	6.77	1.07829	0	0	0	0	0	0	0
Leah Bouterse	11‎/03/2016	12:00:00	0	7.3m	0	2	0	1	1	2	2	1		0	0	0	1	0	0	0	0	0	0	1	0	1	5.77	1.26516	0	0	0	0	0	0	0
Leah Bouterse	11‎/03/2016	12:00:00	0	7.3m	0	2	0	1	1	3	2	1		0	0	0	1	0	0	0	0	0	0	1	0	1	7.17	1.01813	0	0	0	0	0	0	0
Leah Bouterse	11‎/03/2016	12:00:00	0	7.3m	0	2	0	1	1	3	2	1		0	0	0	1	0	0	0	0	0	0	1	0	1	10.78	0.67718	0	0	0	0	0	0	0
Leah Bouterse	11‎/03/2016	12:00:00	0	7.3m	0	2	0	1	1	0	2	2		0	0	0	1	0	0	0	0	0	0	1	0	1	8.32	0.877404	0	0	0	0	0	0	0
Leah Bouterse	11‎/03/2016	12:00:00	0	7.3m	0	2	0	1	1	0	2	2		0	0	0	1	0	0	0	0	0	0	1	0	1	8.47	0.861865	0	0	0	0	0	0	0
Leah Bouterse	11‎/03/2016	12:00:00	0	7.3m	0	2	0	1	1	0	2	2		0	0	0	1	0	0	0	0	0	0	0	1	1	8.93	0.817469	0	0	0	0	0	0	0
Leah Bouterse	11‎/03/2016	12:00:00	0	7.3m	0	2	0	1	1	1	2	2		0	0	0	1	0	0	0	0	0	0	1	0	1	7.52	0.970745	0	0	0	0	0	0	0
Leah Bouterse	11‎/03/2016	12:00:00	0	7.3m	0	2	0	1	1	1	2	2		0	0	0	1	0	0	0	0	0	0	1	0	1	6.1	1.19672	0	0	0	0	0	0	0
Leah Bouterse	11‎/03/2016	12:00:00	0	7.3m	0	2	0	1	1	1	2	2		0	0	0	1	0	0	0	0	0	0	1	0	1	6.23	1.17175	0	0	0	0	0	0	0
Leah Bouterse	11‎/03/2016	12:00:00	0	7.3m	0	2	0	1	1	1	2	2		0	0	0	1	0	0	0	0	0	0	1	0	1	5.45	1.33945	0	0	0	0	0	0	0
Leah Bouterse	11‎/03/2016	12:00:00	0	7.3m	0	2	0	1	1	1	2	2		0	0	0	1	0	0	0	0	0	0	1	0	1	6.4	1.14062	0	0	0	0	0	0	0
Leah Bouterse	11‎/03/2016	12:00:00	0	7.3m	0	2	0	1	1	1	2	2		0	0	0	1	0	0	0	0	0	0	1	0	1	5.91	1.23519	0	0	0	0	0	0	0
Leah Bouterse	11‎/03/2016	12:00:00	0	7.3m	0	4	0	2	1	1	2	2		0	0	0	0	0	1	0	0	0	0	1	0	1	4.6	1.58696	0	0	0	0	0	0	0
Leah Bouterse	11‎/03/2016	12:00:00	0	7.3m	0	2	0	1	1	2	2	2		0	0	0	1	0	0	0	0	0	0	1	0	1	5.51	1.32486	0	0	0	0	0	0	0
Leah Bouterse	11‎/03/2016	12:00:00	0	7.3m	0	2	0	1	1	2	2	2		0	0	0	1	0	0	0	0	0	0	1	0	1	7.5	0.973333	0	0	0	0	0	0	0
Leah Bouterse	11‎/03/2016	12:00:00	0	7.3m	0	2	0	1	1	3	2	2		0	0	0	1	0	0	0	0	0	0	1	0	1	7.22	1.01108	0	0	0	0	0	0	0
Leah Bouterse	11‎/03/2016	12:00:00	0	7.3m	0	2	0	1	1	3	2	2		0	0	0	1	0	0	0	0	0	0	1	0	1	5.63	1.29663	0	0	0	0	0	0	0
Leah Bouterse	11‎/03/2016	12:00:00	0	7.3m	0	2	0	1	1	3	2	2		0	0	0	1	0	0	0	0	0	0	1	0	1	7.97	0.915935	0	0	0	0	0	0	0
Leah Bouterse	11‎/03/2016	12:00:00	0	7.3m	0	2	0	1	1	0	2	3		0	0	0	1	0	0	0	0	0	0	1	0	1	8.17	0.893513	0	0	0	0	0	0	0
Leah Bouterse	11‎/03/2016	12:00:00	0	7.3m	0	2	0	1	1	2	2	3		0	0	0	1	0	0	0	0	0	0	1	0	1	7.92	0.921717	0	0	0	0	0	0	0
Leah Bouterse	11‎/03/2016	12:00:00	0	7.3m	0	2	0	1	1	3	2	3		0	0	0	1	0	0	0	0	0	0	1	0	1	8.12	0.899015	0	0	0	0	0	0	0
Leah Bouterse	11‎/03/2016	12:00:00	0	7.3m	0	2	0	1	1	3	2	3		0	0	0	1	0	0	0	0	0	0	1	0	1	7.88	0.926396	0	0	0	0	0	0	0
Leah Bouterse	11‎/03/2016	12:00:00	0	7.3m	0	2	0	1	1	3	2	3		0	0	0	1	0	0	0	0	0	0	1	0	1	7.12	1.02528	0	0	0	0	0	0	0
Leah Bouterse	11‎/03/2016	12:00:00	0	7.3m	0	3	1	1	1	0	2	1		0	0	0	0	1	0	0	0	0	0	0	1	1	9.05	0.80663	0	0	0	0	0	0	0
Leah Bouterse	11‎/03/2016	12:00:00	0	7.3m	0	3	1	1	1	0	2	1		0	0	0	0	1	0	0	0	0	0	0	1	1	9.05	0.80663	0	0	0	0	0	0	0
Leah Bouterse	11‎/03/2016	12:00:00	0	7.3m	0	3	1	1	1	1	2	1		0	0	0	0	1	0	0	0	0	0	0	1	1	7.67	0.95176	0	0	0	0	0	0	0
Leah Bouterse	11‎/03/2016	12:00:00	0	7.3m	0	3	1	1	1	2	2	1		0	0	0	0	1	0	0	0	0	0	0	1	1	7.52	0.970745	0	0	0	0	0	0	0
Leah Bouterse	11‎/03/2016	12:00:00	0	7.3m	0	3	1	1	1	2	2	1		0	0	0	0	1	0	0	0	0	0	0	1	1	8.72	0.837156	0	0	0	0	0	0	0
Leah Bouterse	11‎/03/2016	12:00:00	0	7.3m	0	3	1	1	1	2	2	1		0	0	0	0	1	0	0	0	0	0	0	1	1	6.48	1.12654	0	0	0	0	0	0	0
Leah Bouterse	11‎/03/2016	12:00:00	0	7.3m	0	3	1	1	1	2	2	1		0	0	0	0	1	0	0	0	0	0	0	1	1	6.1	1.19672	0	0	0	0	0	0	0
Leah Bouterse	11‎/03/2016	12:00:00	0	7.3m	0	3	1	1	1	2	2	1		0	0	0	0	1	0	0	0	0	0	0	1	1	10.67	0.684161	0	0	0	0	0	0	0
Leah Bouterse	11‎/03/2016	12:00:00	0	7.3m	0	3	1	1	1	2	2	1		0	0	0	0	1	0	0	0	0	0	0	1	1	8.1	0.901235	0	0	0	0	0	0	0
Leah Bouterse	11‎/03/2016	12:00:00	0	7.3m	0	3	1	1	1	2	2	1		0	0	0	0	1	0	0	0	0	0	0	1	1	7.73	0.944373	0	0	0	0	0	0	0
Leah Bouterse	11‎/03/2016	12:00:00	0	7.3m	0	3	1	1	1	2	2	1		0	0	0	0	1	0	0	0	0	0	0	1	1	8.66	0.842956	0	0	0	0	0	0	0
Leah Bouterse	11‎/03/2016	12:00:00	0	7.3m	0	3	1	1	1	2	2	1		0	0	0	0	1	0	0	0	0	0	0	1	1	6.83	1.06881	0	0	0	0	0	0	0
Leah Bouterse	11‎/03/2016	12:00:00	0	7.3m	0	3	1	1	1	2	2	1		0	0	0	0	1	0	0	0	0	0	0	1	1	9.88	0.738866	0	0	0	0	0	0	0
Leah Bouterse	11‎/03/2016	12:00:00	0	7.3m	0	3	1	1	1	2	2	1		0	0	0	0	1	0	0	0	0	0	0	1	1	9.58	0.762004	0	0	0	0	0	0	0
Leah Bouterse	11‎/03/2016	12:00:00	0	7.3m	0	3	1	1	1	2	2	1		0	0	0	0	1	0	0	0	0	0	0	1	1	5.89	1.23939	0	0	0	0	0	0	0
Leah Bouterse	11‎/03/2016	12:00:00	0	7.3m	0	3	1	1	1	2	2	1		0	0	0	0	1	0	0	0	0	0	0	1	1	8.23	0.886999	0	0	0	0	0	0	0
Leah Bouterse	11‎/03/2016	12:00:00	0	7.3m	0	3	1	1	1	3	2	1		0	0	0	0	1	0	0	0	0	0	0	1	1	7.57	0.964333	0	0	0	0	0	0	0
Leah Bouterse	11‎/03/2016	12:00:00	0	7.3m	0	3	1	1	1	3	2	1		0	0	0	0	1	0	0	0	0	0	0	1	1	6.5	1.12308	0	0	0	0	0	0	0
Leah Bouterse	11‎/03/2016	12:00:00	0	7.3m	0	3	1	1	1	3	2	1		0	0	0	0	1	0	0	0	0	0	0	1	1	9.58	0.762004	0	0	0	0	0	0	0
Leah Bouterse	11‎/03/2016	12:00:00	0	7.3m	0	3	1	1	1	3	2	1		0	0	0	0	1	0	0	0	0	0	0	1	1	7.85	0.929936	0	0	0	0	0	0	0
Leah Bouterse	11‎/03/2016	12:00:00	0	7.3m	0	3	1	1	1	0	2	2		0	0	0	0	1	0	0	0	0	0	0	1	1	9.32	0.783262	0	0	0	0	0	0	0
Leah Bouterse	11‎/03/2016	12:00:00	0	7.3m	0	3	1	1	1	0	2	2		0	0	0	0	1	0	0	0	0	0	0	1	1	7.67	0.95176	0	0	0	0	0	0	0
Leah Bouterse	11‎/03/2016	12:00:00	0	7.3m	0	3	1	1	1	1	2	2		0	0	0	0	1	0	0	0	0	0	0	1	1	6.6	1.10606	0	0	0	0	0	0	0
Leah Bouterse	11‎/03/2016	12:00:00	0	7.3m	0	3	1	1	1	1	2	2		0	0	0	0	1	0	0	0	0	0	0	1	1	7.15	1.02098	0	0	0	0	0	0	0
Leah Bouterse	11‎/03/2016	12:00:00	0	7.3m	0	3	1	1	1	1	2	2		0	0	0	0	1	0	0	0	0	0	0	1	1	7.98	0.914787	0	0	0	0	0	0	0
Leah Bouterse	11‎/03/2016	12:00:00	0	7.3m	0	3	1	1	1	1	2	2		0	0	0	0	1	0	0	0	0	0	0	1	1	10.35	0.705314	0	0	0	0	0	0	0
Leah Bouterse	11‎/03/2016	12:00:00	0	7.3m	0	3	1	1	1	1	2	2		0	0	0	0	1	0	0	0	0	0	0	1	1	7.77	0.939511	0	0	0	0	0	0	0
Leah Bouterse	11‎/03/2016	12:00:00	0	7.3m	0	3	1	1	1	1	2	2		0	0	0	0	1	0	0	0	0	0	0	1	1	8.23	0.886999	0	0	0	0	0	0	0
Leah Bouterse	11‎/03/2016	12:00:00	0	7.3m	0	3	1	1	1	2	2	2		0	0	0	0	1	0	0	0	0	0	0	1	1	11.45	0.637555	0	0	0	0	0	0	0
Leah Bouterse	11‎/03/2016	12:00:00	0	7.3m	0	3	1	1	1	2	2	2		0	0	0	0	1	0	0	0	0	0	0	1	1	5.7	1.2807	0	0	0	0	0	0	0
Leah Bouterse	11‎/03/2016	12:00:00	0	7.3m	0	3	1	1	1	2	2	2		0	0	0	0	1	0	0	0	0	0	0	1	1	9.05	0.80663	0	0	0	0	0	0	0
Leah Bouterse	11‎/03/2016	12:00:00	0	7.3m	0	3	1	1	1	2	2	2		0	0	0	0	1	0	0	0	0	0	0	1	1	9.9	0.737374	0	0	0	0	0	0	0
Leah Bouterse	11‎/03/2016	12:00:00	0	7.3m	0	3	1	1	1	2	2	2		0	0	0	0	1	0	0	0	0	0	0	1	1	9.25	0.789189	0	0	0	0	0	0	0
Leah Bouterse	11‎/03/2016	12:00:00	0	7.3m	0	3	1	1	1	2	2	2		0	0	0	0	1	0	0	0	0	0	0	1	1	8.47	0.861865	0	0	0	0	0	0	0
Leah Bouterse	11‎/03/2016	12:00:00	0	7.3m	0	3	1	1	1	2	2	2		0	0	0	0	1	0	0	0	0	0	0	1	1	7.91	0.922882	0	0	0	0	0	0	0
Leah Bouterse	11‎/03/2016	12:00:00	0	7.3m	0	3	1	1	1	2	2	2		0	0	0	0	1	0	0	0	0	0	0	1	1	9.6	0.760417	0	0	0	0	0	0	0
Leah Bouterse	11‎/03/2016	12:00:00	0	7.3m	0	3	1	1	1	2	2	2		0	0	0	0	1	0	0	0	0	0	0	1	1	5.8	1.25862	0	0	0	0	0	0	0
Leah Bouterse	11‎/03/2016	12:00:00	0	7.3m	0	3	1	1	1	2	2	2		0	0	0	0	1	0	0	0	0	0	0	1	1	8.22	0.888078	0	0	0	0	0	0	0
Leah Bouterse	11‎/03/2016	12:00:00	0	7.3m	0	3	1	1	1	2	2	2		0	0	0	0	1	0	0	0	0	0	0	1	1	7.18	1.01671	0	0	0	0	0	0	0
Leah Bouterse	11‎/03/2016	12:00:00	0	7.3m	0	3	1	1	1	2	2	2		0	0	0	0	1	0	0	0	0	0	0	1	1	9.65	0.756477	0	0	0	0	0	0	0
Leah Bouterse	11‎/03/2016	12:00:00	0	7.3m	0	3	1	1	1	2	2	2		0	0	0	0	1	0	0	0	0	0	0	1	1	7.88	0.926396	0	0	0	0	0	0	0
Leah Bouterse	11‎/03/2016	12:00:00	0	7.3m	0	3	1	1	1	3	2	2		0	0	0	0	1	0	0	0	0	0	0	1	1	7.6	0.960526	0	0	0	0	0	0	0
Leah Bouterse	11‎/03/2016	12:00:00	0	7.3m	0	3	1	1	1	3	2	2		0	0	0	0	1	0	0	0	0	0	0	1	1	8.16	0.894608	0	0	0	0	0	0	0
Leah Bouterse	11‎/03/2016	12:00:00	0	7.3m	0	3	1	1	1	3	2	2		0	0	0	0	1	0	0	0	0	0	0	1	1	7.45	0.979866	0	0	0	0	0	0	0
Leah Bouterse	11‎/03/2016	12:00:00	0	7.3m	0	3	1	1	1	3	2	2		0	0	0	0	1	0	0	0	0	0	0	1	1	7.45	0.979866	0	0	0	0	0	0	0
Leah Bouterse	11‎/03/2016	12:00:00	0	7.3m	0	3	1	1	1	3	2	2		0	0	0	0	1	0	0	0	0	0	0	1	1	8.17	0.893513	0	0	0	0	0	0	0
Leah Bouterse	11‎/03/2016	12:00:00	0	7.3m	0	3	1	1	1	3	2	2		0	0	0	0	1	0	0	0	0	0	0	1	1	8.47	0.861865	0	0	0	0	0	0	0
Leah Bouterse	11‎/03/2016	12:00:00	0	7.3m	0	3	1	1	1	3	2	2		0	0	0	0	1	0	0	0	0	0	0	1	1	9.1	0.802198	0	0	0	0	0	0	0
Leah Bouterse	11‎/03/2016	12:00:00	0	7.3m	0	3	1	1	1	3	2	2		0	0	0	0	1	0	0	0	0	0	0	1	1	9.52	0.766807	0	0	0	0	0	0	0
Leah Bouterse	11‎/03/2016	12:00:00	0	7.3m	0	3	1	1	1	3	2	2		0	0	0	0	1	0	0	0	0	0	0	1	1	7.37	0.990502	0	0	0	0	0	0	0
Leah Bouterse	11‎/03/2016	12:00:00	0	7.3m	0	3	1	1	1	3	2	2		0	0	0	0	1	0	0	0	0	0	0	1	1	7.88	0.926396	0	0	0	0	0	0	0
Leah Bouterse	11‎/03/2016	12:00:00	0	7.3m	0	3	1	1	1	3	2	2		0	0	0	0	1	0	0	0	0	0	0	1	1	9.19	0.794342	0	0	0	0	0	0	0
Leah Bouterse	11‎/03/2016	12:00:00	0	7.3m	0	3	1	1	1	3	2	2		0	0	0	0	1	0	0	0	0	0	0	1	1	6.9	1.05797	0	0	0	0	0	0	0
Leah Bouterse	11‎/03/2016	12:00:00	0	7.3m	0	3	1	1	1	3	2	2		0	0	0	0	1	0	0	0	0	0	0	1	1	10.3	0.708738	0	0	0	0	0	0	0
Leah Bouterse	11‎/03/2016	12:00:00	0	7.3m	0	3	1	1	1	3	2	2		0	0	0	0	1	0	0	0	0	0	0	1	1	8.8	0.829545	0	0	0	0	0	0	0
Leah Bouterse	11‎/03/2016	12:00:00	0	7.3m	0	3	1	1	1	3	2	2		0	0	0	0	1	0	0	0	0	0	0	1	1	7.98	0.914787	0	0	0	0	0	0	0
Leah Bouterse	11‎/03/2016	12:00:00	0	7.3m	0	3	1	1	1	3	2	2		0	0	0	0	1	0	0	0	0	0	0	1	1	8	0.9125	0	0	0	0	0	0	0
Leah Bouterse	11‎/03/2016	12:00:00	0	7.3m	0	3	1	1	1	1	2	3		0	0	0	0	1	0	0	0	0	0	0	1	1	9.27	0.787487	0	0	0	0	0	0	0
Leah Bouterse	11‎/03/2016	12:00:00	0	7.3m	0	3	1	1	1	3	2	3		0	0	0	0	1	0	0	0	0	0	0	1	1	9.54	0.765199	0	0	0	0	0	0	0
Leah Bouterse	11‎/03/2016	12:00:00	0	7.3m	0	3	1	1	1	2	1	2		1	0	0	2	1	0	0	0	0	0	2	1	2	6.8	1.07353	0	0	0	0	0	0	5
Leah Bouterse	11‎/03/2016	12:00:00	0	7.3m	0	2	0	1	0			0		1	0	0	2	0	0	0	0	0	0	2	0	2	8.46	0.862884	1	0	0	0	1	0	1
Leah Bouterse	11‎/03/2016	12:00:00	0	7.3m	0	2	0	1	1	2	1	2		1	0	0	2	0	0	0	0	0	0	2	0	2	8.75	0.834286	1	0	0	0	1	0	1
Leah Bouterse	11‎/03/2016	12:00:00	0	7.3m	0	3	1	1	1	2	1	1		1	0	0	1	1	0	0	0	0	0	1	1	2	10.43	0.699904	1	0	0	0	1	0	6
Leah Bouterse	11‎/03/2016	12:00:00	0	7.3m	0	3	1	1	1	2	1	2		1	0	0	1	1	0	0	0	0	0	1	1	2	10.27	0.710808	1	0	0	0	1	0	6
Leah Bouterse	11‎/03/2016	12:00:00	0	7.3m	0	2	0	1	1	1	2	1		1	0	0	2	0	0	0	0	0	0	2	0	2	8.53	0.855803	1	0	0	0	1	0	1
Leah Bouterse	11‎/03/2016	12:00:00	0	7.3m	0	2	0	1	1	2	2	1		1	0	0	2	0	0	0	0	0	0	2	0	2	6.13	1.19086	1	0	0	0	1	0	1
Leah Bouterse	11‎/03/2016	12:00:00	0	7.3m	0	2	0	1	1	2	2	1		1	0	0	2	0	0	0	0	0	0	2	0	2	6.61	1.10439	1	0	0	0	1	0	1
Leah Bouterse	11‎/03/2016	12:00:00	0	7.3m	0	2	0	1	1	2	2	1		1	0	0	2	0	0	0	0	0	0	2	0	2	7.42	0.983827	1	0	0	0	1	0	1
Leah Bouterse	11‎/03/2016	12:00:00	0	7.3m	0	2	0	1	1	2	2	1		1	0	0	2	0	0	0	0	0	0	2	0	2	6.88	1.06105	1	0	0	0	1	0	1
Leah Bouterse	11‎/03/2016	12:00:00	0	7.3m	0	2	0	1	1	2	2	1		1	0	0	2	0	0	0	0	0	0	2	0	2	9.52	0.766807	1	0	0	0	1	0	1
Leah Bouterse	11‎/03/2016	12:00:00	0	7.3m	0	2	0	1	1	0	2	2		1	0	0	2	0	0	0	0	0	0	2	0	2	8.05	0.906832	1	0	0	0	1	0	1
Leah Bouterse	11‎/03/2016	12:00:00	0	7.3m	0	2	0	1	1	1	2	2		1	0	0	2	0	0	0	0	0	0	2	0	2	7.97	0.915935	1	0	0	0	1	0	1
Leah Bouterse	11‎/03/2016	12:00:00	0	7.3m	0	2	0	1	1	2	2	2		1	0	0	2	0	0	0	0	0	0	2	0	2	6.8	1.07353	1	0	0	0	1	0	1
Leah Bouterse	11‎/03/2016	12:00:00	0	7.3m	0	3	1	1	1	2	2	1		1	0	0	1	1	0	0	0	0	0	1	1	2	5.93	1.23103	1	0	0	0	1	0	6
Leah Bouterse	11‎/03/2016	12:00:00	0	7.3m	0	3	1	1	1	2	2	1		1	0	0	1	1	0	0	0	0	0	1	1	2	5.93	1.23103	1	0	0	0	1	0	6
Leah Bouterse	11‎/03/2016	12:00:00	0	7.3m	0	3	1	1	1	2	2	1		1	0	0	1	1	0	0	0	0	0	1	1	2	7.22	1.01108	1	0	0	0	1	0	6
Leah Bouterse	11‎/03/2016	12:00:00	0	7.3m	0	3	1	1	1	3	2	1		1	0	0	1	1	0	0	0	0	0	1	1	2	11.22	0.650624	1	0	0	0	1	0	6
Leah Bouterse	11‎/03/2016	12:00:00	0	7.3m	0	3	1	1	1	3	2	2		1	0	0	1	1	0	0	0	0	0	1	1	2	8.22	0.888078	1	0	0	0	1	0	6
Leah Bouterse	11‎/03/2016	12:00:00	0	7.3m	0	3	1	1	1	3	2	2		1	0	0	1	1	0	0	0	0	0	1	1	2	8.11	0.900123	1	0	0	0	1	0	6
Leah Bouterse	11‎/03/2016	12:00:00	0	7.3m	0	3	1	1	1	2	2	1		1	0	0	3	1	0	0	0	0	0	3	1	4	8.92	0.818386	1	0	0	0	1	0	6
Leah Bouterse	11‎/03/2016	12:00:00	0	7.3m	0	3	1	1	1	2	1	1		1	0	0	0	2	0	0	0	0	0	0	2	2	10.33	0.70668	0	1	0	0	2	0	2
Leah Bouterse	11‎/03/2016	12:00:00	0	7.3m	0	3	1	1	1	2	1	2		1	0	0	0	2	0	0	0	0	0	0	2	2	8.19	0.891331	0	1	0	0	2	0	2
Leah Bouterse	11‎/03/2016	12:00:00	0	7.3m	0	3	1	1	1	2	1	2		1	0	0	0	2	0	0	0	0	0	0	2	2	8.71	0.838117	0	1	0	0	2	0	2
Leah Bouterse	11‎/03/2016	12:00:00	0	7.3m	0	2	0	1	1	0	2	1		1	0	0	1	1	0	0	0	0	0	1	1	2	8.19	0.891331	0	1	0	0	2	0	6
Leah Bouterse	11‎/03/2016	12:00:00	0	7.3m	0	2	0	1	1	1	2	2		1	0	0	1	1	0	0	0	0	0	1	1	2	10.17	0.717797	0	1	0	0	2	0	6
Leah Bouterse	11‎/03/2016	12:00:00	0	7.3m	0	3	1	1	1	3	2	1		1	0	0	0	2	0	0	0	0	0	0	2	2	10	0.73	0	1	0	0	2	0	2
Leah Bouterse	11‎/03/2016	12:00:00	0	7.3m	0	3	1	1	1	2	2	2		1	0	0	0	2	0	0	0	0	0	0	2	2	8.71	0.838117	0	1	0	0	2	0	2
Leah Bouterse	11‎/03/2016	12:00:00	0	7.3m	0	3	1	1	1	1	2	2		1	0	0	0	2	0	0	0	0	0	0	2	2	6.75	1.08148	0	1	0	0	2	0	2
Leah Bouterse	11‎/03/2016	12:00:00	0	7.3m	0	5	1	2	1	1	2	2		1	0	0	0	0	0	1	0	0	0	0	2	2	7.78	0.938303	0	1	0	0	2	0	2
Leah Bouterse	11‎/03/2016	12:00:00	0	7.3m	0	3	1	1	1	2	2	2		1	0	0	0	2	0	0	0	0	0	0	2	2	15.54	0.469755	0	1	0	0	2	0	2
Leah Bouterse	11‎/03/2016	12:00:00	0	7.3m	0	3	1	1	1	3	2	2		1	0	0	0	2	0	0	0	0	0	0	2	2	8.25	0.884848	0	1	0	0	2	0	2
Leah Bouterse	11‎/03/2016	12:00:00	0	7.3m	0	3	1	1	1	3	2	2		1	0	0	0	2	0	0	0	0	0	0	2	2	9.55	0.764398	0	1	0	0	2	0	2
Leah Bouterse	11‎/03/2016	12:00:00	0	7.3m	0	3	1	1	1	3	2	2		1	0	0	0	2	0	0	0	0	0	0	2	2	8.42	0.866983	0	1	0	0	2	0	2
Leah Bouterse	11‎/03/2016	12:00:00	0	7.3m	0	3	1	1	1	3	2	2		1	0	0	0	2	0	0	0	0	0	0	2	2	7.37	0.990502	0	1	0	0	2	0	2
Leah Bouterse	11‎/03/2016	12:00:00	0	7.3m	0	3	1	1	1	2	2	3		1	0	0	0	2	0	0	0	0	0	0	2	2	8.76	0.833333	0	1	0	0	2	0	2
Leah Bouterse	11‎/03/2016	12:00:00	0	7.3m	0	3	1	1	1	2	2	1		1	0	0	0	3	0	0	0	0	0	0	3	3	8.53	0.855803	0	1	0	0	2	0	2
Leah Bouterse	11‎/03/2016	12:00:00	0	7.3m	0	3	1	1	1	0	0	2	0	1	0	0	1	1	0	0	0	0	0	1	1	2	8.43	0.865955	1	0	0	1	3	1	5
Leah Bouterse	11‎/03/2016	12:00:00	0	7.3m	0	3	1	1	1	0	0	2	0	1	0	0	1	1	0	0	0	0	0	1	1	2	10.11	0.722057	1	0	0	1	3	1	5
Leah Bouterse	11‎/03/2016	12:00:00	0	7.3m	0	3	1	1	1	2	0	2	0	1	0	0	1	1	0	0	0	0	0	1	1	2	8.58	0.850816	1	0	0	1	3	1	5
Leah Bouterse	11‎/03/2016	12:00:00	0	7.3m	0	3	1	1	1	2	0	2	0	1	0	0	1	1	0	0	0	0	0	1	1	2	10.07	0.724926	1	0	0	1	3	1	5
Leah Bouterse	11‎/03/2016	12:00:00	0	7.3m	0	3	1	1	1	2	1	2		1	0	0	0	1	0	0	1	0	0	1	1	2	9.52	0.766807	1	0	0	1	3	2	4
Leah Bouterse	11‎/03/2016	12:00:00	0	7.3m	0	3	1	1	1	2	1	2		1	0	0	1	1	0	0	1	0	0	2	1	3	8.7	0.83908	1	0	0	1	3	2	5
Leah Bouterse	11‎/03/2016	12:00:00	0	7.3m	0	3	1	1	1	2	2	1		1	0	0	0	1	0	0	1	0	0	1	1	2	9.47	0.770855	1	0	0	1	3	2	4
Leah Bouterse	11‎/03/2016	12:00:00	0	7.3m	0	3	1	1	1	2	2	1		1	0	0	0	1	0	0	1	0	0	1	1	2	9.03	0.808416	1	0	0	1	3	2	4
Leah Bouterse	11‎/03/2016	12:00:00	0	7.3m	0	3	1	1	1	2	2	1		1	0	0	0	1	0	0	1	0	0	1	1	2	8.43	0.865955	1	0	0	1	3	2	4
Leah Bouterse	11‎/03/2016	12:00:00	0	7.3m	0	3	1	1	1	2	2	1		1	0	0	0	1	0	0	1	0	0	1	1	2	7.82	0.933504	1	0	0	1	3	2	4
Leah Bouterse	11‎/03/2016	12:00:00	0	7.3m	0	3	1	1	1	3	2	2		1	0	0	0	1	0	0	1	0	0	1	1	2	8.03	0.909091	1	0	0	1	3	2	4
Leah Bouterse	11‎/03/2016	12:00:00	0	7.3m	0	2	0	1	1	2	0	3	1	1	0	0	1	1	0	0	0	0	0	1	1	2	9.01	0.810211	0	1	0	1	4	1	5
Leah Bouterse	11‎/03/2016	12:00:00	0	7.3m	0	3	1	1	1	0	0	2	0	1	0	0	0	2	0	0	0	0	0	0	2	2	9.37	0.779082	0	1	0	1	4	1	4
Leah Bouterse	11‎/03/2016	12:00:00	0	7.3m	0	3	1	1	1	0	0	2	0	1	0	0	0	2	0	0	0	0	0	0	2	2	9.74	0.749487	0	1	0	1	4	1	4
Leah Bouterse	11‎/03/2016	12:00:00	0	7.3m	0	3	1	1	1	2	0	3	1	1	0	0	0	1	0	0	0	1	0	0	2	2	9.42	0.774947	0	1	0	1	4	3	4
Leah Bouterse	11‎/03/2016	12:00:00	0	7.3m	0	3	1	1	1	2	0	3	1	1	0	0	0	2	0	0	0	0	0	0	2	2	8.71	0.838117	0	1	0	1	4	1	4
Leah Bouterse	11‎/03/2016	12:00:00	0	7.3m	0	3	1	1	1	3	2	2		1	0	0	0	1	0	0	0	1	0	0	2	2	11.41	0.63979	0	1	0	1	4	2	4
Leah Bouterse	11‎/03/2016	12:00:00	0	7.3m	0	3	1	1	1	3	2	2		1	0	0	0	1	0	0	0	1	0	0	2	2	9.91	0.73663	0	1	0	1	4	2	4
Leah Bouterse	11‎/03/2016	12:00:00	0	7.3m	0	3	1	1	1	2	2	3		1	0	0	0	2	0	0	0	1	0	0	3	3	8.02	0.910224	0	1	0	1	4	2	4
Leah Bouterse	11‎/03/2016	12:00:00	0	7.3m	0	2	0	1	1	2	2	1		1	0	0	1	0	0	0	1	1	0	2	1	3	8.44	0.864929	0	0	1	1	5	2	3
Leah Bouterse	11‎/03/2016	12:00:00	0	7.3m	0	2	0	1	1	2	2	1		1	0	0	1	0	0	0	1	1	0	2	1	3	8.53	0.855803	0	0	1	1	5	2	3
Leah Bouterse	11‎/03/2016	12:00:00	0	7.3m	0	3	1	1	1	3	2	2		1	0	0	0	2	0	0	1	0	0	1	2	3	10.91	0.669111	0	0	1	1	5	2	4
Leah Bouterse	11‎/03/2016	12:00:00	0	7.3m	0	3	1	1	1	2	1	2		1	0	0	1	2	0	0	0	0	0	1	2	3	9.08	0.803965	0	0	1	0	6	0	6
Leah Bouterse	11‎/03/2016	12:00:00	0	7.3m	0	3	1	1	1	3	2	1		1	0	0	1	2	0	0	0	0	0	1	2	3	7.25	1.0069	0	0	1	0	6	0	6
Leah Bouterse	11‎/03/2016	12:00:00	0	7.3m	0	7	0	3	1	2	1	1		1	0	0	0	0	0	0	2	0	0	2	0	2	6.81	1.07195	1	0	0	1	7	2	7
Leah Bouterse	11‎/03/2016	12:00:00	0	7.3m	0	2	0	1	0			0		0	0	0	1	0	0	0	0	0	0	1	0	1	7.57	0.964333	0	0	0	0	0	0	0
Leah Bouterse	11‎/03/2016	12:00:00	0	7.3m	0	2	0	1	0			0		0	0	0	1	0	0	0	0	0	0	1	0	1	7.37	0.990502	0	0	0	0	0	0	0
Leah Bouterse	11‎/03/2016	12:00:00	0	7.3m	0	2	0	1	0			0		0	0	0	1	0	0	0	0	0	0	1	0	1	7.45	0.979866	0	0	0	0	0	0	0
Leah Bouterse	11‎/03/2016	12:00:00	0	7.3m	0	2	0	1	0			0		0	0	0	1	0	0	0	0	0	0	1	0	1	9.01	0.810211	0	0	0	0	0	0	0
Leah Bouterse	11‎/03/2016	12:00:00	0	7.3m	0	2	0	1	0			0		0	0	0	1	0	0	0	0	0	0	1	0	1	8.42	0.866983	0	0	0	0	0	0	0
Leah Bouterse	11‎/03/2016	12:00:00	0	7.3m	0	2	0	1	0			0		0	0	0	1	0	0	0	0	0	0	1	0	1	9.1	0.802198	0	0	0	0	0	0	0
Leah Bouterse	11‎/03/2016	12:00:00	0	7.3m	0	1	1	0	0			0		0	0	1	0	0	0	0	0	0	0	0	1	1	9.9	0.737374	0	0	0	0	0	0	0
Leah Bouterse	11‎/03/2016	12:00:00	0	7.3m	0	3	1	1	0			0		0	0	0	0	1	0	0	0	0	0	0	1	1	8.2	0.890244	0	0	0	0	0	0	0
Leah Bouterse	11‎/03/2016	12:00:00	0	7.3m	0	3	1	1	0			0		0	0	0	0	1	0	0	0	0	0	0	1	1	8.2	0.890244	0	0	0	0	0	0	0
Leah Bouterse	11‎/03/2016	12:00:00	0	7.3m	0	3	1	1	0			0		0	0	0	1	0	0	0	0	0	0	1	0	1	9.01	0.810211	0	0	0	0	0	0	0
Leah Bouterse	11‎/03/2016	12:00:00	0	7.3m	0	3	1	1	0			0		0	0	0	0	1	0	0	0	0	0	0	1	1	10.13	0.720632	0	0	0	0	0	0	0
Leah Bouterse	11‎/03/2016	12:00:00	0	7.3m	0	3	1	1	0			0		0	0	0	0	1	0	0	0	0	0	0	1	1	9.68	0.754132	0	0	0	0	0	0	0
Leah Bouterse	11‎/03/2016	12:00:00	0	7.3m	0	3	1	1	1	0	0	2	0	0	0	0	0	1	0	0	0	0	0	0	1	1	9.71	0.751802	0	0	0	1	0	1	0
Leah Bouterse	11‎/03/2016	12:00:00	0	7.3m	0	3	1	1	1	0	0	2	0	0	0	0	0	1	0	0	0	0	0	0	1	1	10.23	0.713587	0	0	0	1	0	1	0
Leah Bouterse	11‎/03/2016	12:00:00	0	7.3m	0	3	1	1	1	2	0	2	0	0	0	0	0	1	0	0	0	0	0	0	1	1	9.48	0.770042	0	0	0	1	0	1	0
Leah Bouterse	11‎/03/2016	12:00:00	0	7.3m	0	3	1	1	1	2	0	2	0	0	0	0	0	1	0	0	0	0	0	0	1	1	10.7	0.682243	0	0	0	1	0	1	0
Leah Bouterse	11‎/03/2016	12:00:00	0	7.3m	0	3	1	1	1	2	0	2	0	0	0	0	0	1	0	0	0	0	0	0	1	1	10.22	0.714286	0	0	0	1	0	1	0
Leah Bouterse	11‎/03/2016	12:00:00	0	7.3m	0	3	1	1	1	1	0	3	1	0	0	0	0	1	0	0	0	0	0	0	1	1	9.12	0.800439	0	0	0	1	0	1	0
Leah Bouterse	11‎/03/2016	12:00:00	0	7.3m	0	2	0	1	1	0	1	1		0	0	0	1	0	0	0	0	0	0	1	0	1	6.78	1.0767	0	0	0	0	0	0	0
Leah Bouterse	11‎/03/2016	12:00:00	0	7.3m	0	2	0	1	1	2	1	1		0	0	0	1	0	0	0	0	0	0	1	0	1	5.46	1.337	0	0	0	0	0	0	0
Leah Bouterse	11‎/03/2016	12:00:00	0	7.3m	0	2	0	1	1	2	1	1		0	0	0	1	0	0	0	0	0	0	1	0	1	6.52	1.11963	0	0	0	0	0	0	0
Leah Bouterse	11‎/03/2016	12:00:00	0	7.3m	0	2	0	1	1	2	1	1		0	0	0	1	0	0	0	0	0	0	1	0	1	5.95	1.22689	0	0	0	0	0	0	0
Leah Bouterse	11‎/03/2016	12:00:00	0	7.3m	0	2	0	1	1	2	1	1		0	0	0	1	0	0	0	0	0	0	1	0	1	5.93	1.23103	0	0	0	0	0	0	0
Leah Bouterse	11‎/03/2016	12:00:00	0	7.3m	0	2	0	1	1	2	1	2		0	0	0	1	0	0	0	0	0	0	1	0	1	8.33	0.876351	0	0	0	0	0	0	0
Leah Bouterse	11‎/03/2016	12:00:00	0	7.3m	0	2	0	1	1	2	1	2		0	0	0	1	0	0	0	0	0	0	1	0	1	9.42	0.774947	0	0	0	0	0	0	0
Leah Bouterse	11‎/03/2016	12:00:00	0	7.3m	0	2	0	1	1	2	1	2		0	0	0	1	0	0	0	0	0	0	1	0	1	7.92	0.921717	0	0	0	0	0	0	0
Leah Bouterse	11‎/03/2016	12:00:00	0	7.3m	0	2	0	1	1	2	1	2		0	0	0	1	0	0	0	0	0	0	1	0	1	8.62	0.846868	0	0	0	0	0	0	0
Leah Bouterse	11‎/03/2016	12:00:00	0	7.3m	0	2	0	1	1	2	1	2		0	0	0	1	0	0	0	0	0	0	1	0	1	7.16	1.01955	0	0	0	0	0	0	0
Leah Bouterse	11‎/03/2016	12:00:00	0	7.3m	0	2	0	1	1	2	1	2		0	0	0	1	0	0	0	0	0	0	1	0	1	7.2	1.01389	0	0	0	0	0	0	0
Leah Bouterse	11‎/29/2016	17:30:00	0	7.3m	0	3	1	1	1	2	1	1		0	0	0	0	1	0	0	0	0	0	0	1	1	9.77	0.747185	0	0	0	0	0	0	0
Leah Bouterse	11‎/29/2016	17:30:00	0	7.3m	0	3	1	1	1	2	1	1		0	0	0	0	1	0	0	0	0	0	0	1	1	12.69	0.575256	0	0	0	0	0	0	0
Leah Bouterse	11‎/29/2016	17:30:00	0	7.3m	0	3	1	1	1	2	1	1		0	0	0	0	1	0	0	0	0	0	0	1	1	7.72	0.945596	0	0	0	0	0	0	0
Leah Bouterse	11‎/29/2016	17:30:00	0	7.3m	0	2	0	1	1	0	2	1		0	0	0	1	0	0	0	0	0	0	1	0	1	7.98	0.914787	0	0	0	0	0	0	0
Leah Bouterse	11‎/29/2016	17:30:00	0	7.3m	0	2	0	1	1	2	2	1		0	0	0	1	0	0	0	0	0	0	1	0	1	7.08	1.03107	0	0	0	0	0	0	0
Leah Bouterse	11‎/29/2016	17:30:00	0	7.3m	0	3	1	1	1	1	2	2		0	0	0	0	1	0	0	0	0	0	0	1	1	9.4	0.776596	0	0	0	0	0	0	0
Leah Bouterse	11‎/29/2016	17:30:00	0	7.3m	0	3	1	1	1	1	2	2		0	0	0	0	1	0	0	0	0	0	0	1	1	6.41	1.13885	0	0	0	0	0	0	0
Leah Bouterse	11‎/29/2016	17:30:00	0	7.3m	0	1	1	0	1	3	2	2		0	0	1	0	0	0	0	0	0	0	0	1	1	9	0.811111	0	0	0	0	0	0	0
Leah Bouterse	11‎/29/2016	17:30:00	0	7.3m	0	3	1	1	1	2	2	3		0	0	0	0	1	0	0	0	0	0	0	1	1	8.43	0.865955	0	0	0	0	0	0	0
Leah Bouterse	11‎/29/2016	17:30:00	0	7.3m	0	1	1	0	0			0		0	0	1	1	0	0	0	0	1	0	1	2	3	10.27	0.710808	0	0	1	1	5	2	0
Leah Bouterse	11‎/29/2016	17:30:00	0	7.3m	0	2	0	1	0			0		1	0	0	2	0	0	0	0	0	0	2	0	2	9.67	0.754912	1	0	0	0	1	0	1
Leah Bouterse	11‎/29/2016	17:30:00	0	7.3m	0	2	0	1	1	0	1	1		1	0	0	2	0	0	0	0	0	0	2	0	2	7.95	0.918239	1	0	0	0	1	0	1
Leah Bouterse	11‎/29/2016	17:30:00	0	7.3m	0	2	0	1	1	0	1	1		1	0	0	2	0	0	0	0	0	0	2	0	2	6.48	1.12654	1	0	0	0	1	0	1
Leah Bouterse	11‎/29/2016	17:30:00	0	7.3m	0	3	1	1	1	3	1	1		1	0	0	2	1	0	0	0	0	0	2	1	3	8.02	0.910224	1	0	0	0	1	0	6
Leah Bouterse	11‎/29/2016	17:30:00	0	7.3m	0	2	0	1	1	2	2	1		1	0	0	2	0	0	0	0	0	0	2	0	2	8.13	0.897909	1	0	0	0	1	0	1
Leah Bouterse	11‎/29/2016	17:30:00	0	7.3m	0	3	1	1	1	2	2	1		1	0	0	4	1	0	0	0	0	0	4	1	5	10.5	0.695238	1	0	0	0	1	0	6
Leah Bouterse	11‎/29/2016	17:30:00	0	7.3m	0	3	1	1	1	1	2	1		1	0	0	0	2	0	0	0	0	0	0	2	2	7	1.04286	0	1	0	0	2	0	2
Leah Bouterse	11‎/29/2016	17:30:00	0	7.3m	0	3	1	1	1	2	2	1		1	0	0	0	2	0	0	0	0	0	0	2	2	8.67	0.841984	0	1	0	0	2	0	2
Leah Bouterse	11‎/29/2016	17:30:00	0	7.3m	0	3	1	1	1	3	2	1		1	0	0	0	2	0	0	0	0	0	0	2	2	9.35	0.780749	0	1	0	0	2	0	2
Leah Bouterse	11‎/29/2016	17:30:00	0	7.3m	0	3	1	1	1	3	2	1		1	0	0	0	2	0	0	0	0	0	0	2	2	7.05	1.03546	0	1	0	0	2	0	2
Leah Bouterse	11‎/29/2016	17:30:00	0	7.3m	0	3	1	1	1	3	2	1		1	0	0	0	2	0	0	0	0	0	0	2	2	6.45	1.13178	0	1	0	0	2	0	2
Leah Bouterse	11‎/29/2016	17:30:00	0	7.3m	0	3	1	1	1	3	2	1		1	0	0	0	2	0	0	0	0	0	0	2	2	5.33	1.36961	0	1	0	0	2	0	2
Leah Bouterse	11‎/29/2016	17:30:00	0	7.3m	0	3	1	1	1	1	2	2		1	0	0	0	2	0	0	0	0	0	0	2	2	10.13	0.720632	0	1	0	0	2	0	2
Leah Bouterse	11‎/29/2016	17:30:00	0	7.3m	0	3	1	1	1	1	2	1		1	0	0	0	4	0	0	0	0	0	0	4	4	7.85	0.929936	0	1	0	0	2	0	2
Leah Bouterse	11‎/29/2016	17:30:00	0	7.3m	0	2	0	1	1	2	2	2		1	0	0	1	0	0	0	1	0	0	2	0	2	16.09	0.453698	1	0	0	1	3	2	3
Leah Bouterse	11‎/29/2016	17:30:00	0	7.3m	0	3	1	1	1	1	0	2	0	1	0	0	0	2	0	0	0	0	0	0	2	2	11.63	0.627687	0	1	0	1	4	1	4
Leah Bouterse	11‎/29/2016	17:30:00	0	7.3m	0	3	1	1	1	2	0	2	0	1	0	0	0	2	0	0	0	0	0	0	2	2	10.52	0.693916	0	1	0	1	4	1	4
Leah Bouterse	11‎/29/2016	17:30:00	0	7.3m	0	3	1	1	1	2	0	2	0	1	0	0	0	3	0	0	1	0	0	1	3	4	17.01	0.429159	0	0	1	1	5	3	4
Leah Bouterse	11‎/29/2016	17:30:00	0	7.3m	0	3	1	1	1	2	2	2		1	0	0	1	2	0	0	0	0	0	1	2	3	8.08	0.903465	0	0	1	0	6	0	6
Leah Bouterse	11‎/29/2016	17:30:00	0	7.3m	0	2	0	1	1	2	0	3	1	0	0	0	1	0	0	0	0	0	0	1	0	1	10.33	0.70668	0	0	0	1	0	1	0
Leah Bouterse	11‎/29/2016	17:30:00	0	7.3m	0	3	1	1	1	0	0	2	0	0	0	0	0	1	0	0	0	0	0	0	1	1	7.8	0.935897	0	0	0	1	0	1	0
Leah Bouterse	11‎/29/2016	17:30:00	0	7.3m	0	3	1	1	1	1	0	2	0	0	0	0	0	1	0	0	0	0	0	0	1	1	8.28	0.881643	0	0	0	1	0	1	0
Leah Bouterse	11‎/29/2016	17:30:00	0	7.3m	0	3	1	1	1	1	0	2	0	0	0	0	0	1	0	0	0	0	0	0	1	1	7.75	0.941935	0	0	0	1	0	1	0
Leah Bouterse	11‎/29/2016	17:30:00	0	7.3m	0	3	1	1	1	2	0	2	0	0	0	0	0	1	0	0	0	0	0	0	1	1	8.73	0.836197	0	0	0	1	0	1	0
Leah Bouterse	11‎/29/2016	17:30:00	0	7.3m	0	2	0	1	1	0	1	1		0	0	0	1	0	0	0	0	0	0	1	0	1	9.3	0.784946	0	0	0	0	0	0	0
Leah Bouterse	11‎/29/2016	17:30:00	0	7.3m	0	0	0	0	1	2	1	1		0	1	0	0	0	0	0	0	0	0	1	0	1	10.55	0.691943	0	0	0	0	0	0	0
Leah Bouterse	12‎/01/2016	17:30:00	0	7.3m	0	1	1	0	1	2	1	2		0	0	1	0	0	0	0	0	0	0	0	1	1	11.05	0.660633	0	0	0	0	0	0	0
Leah Bouterse	12‎/01/2016	17:30:00	0	7.3m	0	3	1	1	1	2	1	2		0	0	0	0	1	0	0	0	0	0	0	1	1	8.72	0.837156	0	0	0	0	0	0	0
Leah Bouterse	12‎/01/2016	17:30:00	0	7.3m	0	2	0	1	1	2	2	1		0	0	0	1	0	0	0	0	0	0	1	0	1	6.33	1.15324	0	0	0	0	0	0	0
Leah Bouterse	12‎/01/2016	17:30:00	0	7.3m	0	2	0	1	1	3	2	2		0	0	0	1	0	0	0	0	0	0	1	0	1	6.58	1.10942	0	0	0	0	0	0	0
Leah Bouterse	12‎/01/2016	17:30:00	0	7.3m	0	3	1	1	1	3	2	1		0	0	0	0	1	0	0	0	0	0	0	1	1	5.58	1.30824	0	0	0	0	0	0	0
Leah Bouterse	12‎/01/2016	17:30:00	0	7.3m	0	6	1	2	1	1	2	2		0	0	0	0	0	0	0	0	1	0	0	1	1	8.18	0.892421	0	0	0	1	0	2	0
Leah Bouterse	12‎/01/2016	17:30:00	0	7.3m	0	3	1	1	1	2	2	2		0	0	0	0	1	0	0	0	0	0	0	1	1	11	0.663636	0	0	0	0	0	0	0
Leah Bouterse	12‎/01/2016	17:30:00	0	7.3m	0	3	1	1	1	3	2	2		1	0	0	1	1	0	0	0	0	0	1	1	2	11.23	0.650045	1	0	0	0	1	0	6
Leah Bouterse	12‎/01/2016	17:30:00	0	7.3m	0	3	1	1	1	3	2	2		1	0	0	0	2	0	0	0	0	0	0	2	2	9.63	0.758048	0	1	0	0	2	0	2
Leah Bouterse	12‎/01/2016	17:30:00	0	7.3m	0	3	1	1	1	3	2	1		1	0	0	0	1	0	0	1	0	0	1	1	2	10.03	0.727817	1	0	0	1	3	2	4
Leah Bouterse	12‎/01/2016	17:30:00	0	7.3m	0	2	0	1	0			0		0	0	0	1	0	0	0	0	0	0	1	0	1	7.12	1.02528	0	0	0	0	0	0	0
Leah Bouterse	12‎/01/2016	17:30:00	0	7.3m	0	2	0	1	0			0		0	0	0	1	0	0	0	0	0	0	1	0	1	8.27	0.882709	0	0	0	0	0	0	0
Leah Bouterse	12‎/01/2016	17:30:00	0	7.3m	0	2	0	1	0			0		0	0	0	1	0	0	0	0	0	0	1	0	1	5.83	1.25214	0	0	0	0	0	0	0
Leah Bouterse	12‎/01/2016	17:30:00	0	7.3m	0	3	1	1	0			0		0	0	0	0	1	0	0	0	0	0	0	1	1	6	1.21667	0	0	0	0	0	0	0
Leah Bouterse	12‎/01/2016	17:30:00	0	7.3m	0	3	1	1	1	0	0	2	0	0	0	0	0	1	0	0	0	0	0	0	1	1	8	0.9125	0	0	0	1	0	1	0
Leah Bouterse	12‎/01/2016	17:30:00	0	7.3m	0	2	0	1	1	0	1	2		0	0	0	1	0	0	0	0	0	0	1	0	1	7.45	0.979866	0	0	0	0	0	0	0
